# Supplementary material for: Optimization of axial ligands to promote the photoactivation of BODIPY-conjugated platinum(iv) anticancer prodrugs
Source: Royal Society of Chemistry journal article supplement (doi:10.1039/d1dt02362d), 2021-01-01
Supplement: d1dt02362d1.pdf [file d1dt02362d1.pdf]

Supporting Information for

**Optimization of axial ligands to promote the photoactivation of BODIPY-  
conjugated platinum(IV) anticancer prodrugs**

*Houzong Yao,<sup>ab</sup> Yuliana F. Gunawan,<sup>a</sup> Gongyuan Liu,<sup>ab</sup> Man-Kit Tse,<sup>a</sup> and Guangyu Zhu<sup>\*ab</sup>*

<sup>a</sup> Department of Chemistry, City University of Hong Kong, 83 Tat Chee Avenue, Hong Kong SAR  
999077, People's Republic of China

<sup>b</sup> City University of Hong Kong Shenzhen Research Institute, Shenzhen 518057, People's  
Republic of China

\* Email: guangzhu@cityu.edu.hk

CONTENTS

**Figure S1-S2.** <sup>1</sup>H-NMR and ESI-MS spectra of compound **1**.

**Figure S3-S4.** <sup>1</sup>H-NMR and ESI-MS spectra of compound **6**.

**Figure S5-S6.** <sup>1</sup>H-NMR and ESI-MS spectra of compound **7**.

**Figure S7-S8.** <sup>1</sup>H-NMR and ESI-MS spectra of compound **8**.

**Figure S9-S10.** <sup>1</sup>H-NMR and ESI-MS spectra of compound **9**.

**Figure S11-S12.**  $^1\text{H}$ -NMR and ESI-MS spectra of compound **10**.

**Figure S13-S14.**  $^1\text{H}$ -NMR and ESI-MS spectra of compound **11**.

**Figure S15-S16.**  $^1\text{H}$ -NMR and ESI-MS spectra of compound **12**.

**Figure S17-S18.**  $^1\text{H}$ -NMR and ESI-MS spectra of compound **13**.

**Figure S19-S20.**  $^1\text{H}$ -NMR and ESI-MS spectra of compound **14**.

**Figures S21-S25.**  $^1\text{H}$ -NMR,  $^{13}\text{C}$ -NMR,  $^{19}\text{F}$ -NMR,  $^{195}\text{Pt}$ -NMR, and ESI-MS spectra of complex **OH3C**.

**Figures S26-S30.**  $^1\text{H}$ -NMR,  $^{13}\text{C}$ -NMR,  $^{19}\text{F}$ -NMR,  $^{195}\text{Pt}$ -NMR, and ESI-MS spectra of complex **OH4C**.

**Figures S31-S35.**  $^1\text{H}$ -NMR,  $^{13}\text{C}$ -NMR,  $^{19}\text{F}$ -NMR,  $^{195}\text{Pt}$ -NMR, and ESI-MS spectra of complex **OH6C**.

**Figures S36-S40.**  $^1\text{H}$ -NMR,  $^{13}\text{C}$ -NMR,  $^{19}\text{F}$ -NMR,  $^{195}\text{Pt}$ -NMR, and ESI-MS spectra of complex **OH8C**.

**Figure S41-S42.**  $^1\text{H}$ -NMR and ESI-MS spectra of compound **15**.

**Figure S43-S44.**  $^1\text{H}$ -NMR and ESI-MS spectra of compound **20**.

**Figure S45-S46.**  $^1\text{H}$ -NMR and ESI-MS spectra of compound **21**.

**Figure S47-S48.**  $^1\text{H}$ -NMR and ESI-MS spectra of compound **22**.

**Figure S49-S50.**  $^1\text{H}$ -NMR and ESI-MS spectra of compound **23**.

**Figure S51-S52.**  $^1\text{H}$ -NMR and ESI-MS spectra of compound **24**.

**Figure S53-S54.**  $^1\text{H}$ -NMR and ESI-MS spectra of compound **25**.

**Figure S55-S56.**  $^1\text{H}$ -NMR and ESI-MS spectra of compound **26**.

**Figure S57-S58.**  $^1\text{H}$ -NMR and ESI-MS spectra of compound **27**.

**Figures S59-S63.**  $^1\text{H}$ -NMR,  $^{13}\text{C}$ -NMR,  $^{19}\text{F}$ -NMR,  $^{195}\text{Pt}$ -NMR, and ESI-MS spectra of complex **AC3C**.

**Figures S64-S68.**  $^1\text{H}$ -NMR,  $^{13}\text{C}$ -NMR,  $^{19}\text{F}$ -NMR,  $^{195}\text{Pt}$ -NMR, and ESI-MS spectra of complex **AC4C**.

**Figures S69-S73.**  $^1\text{H}$ -NMR,  $^{13}\text{C}$ -NMR,  $^{19}\text{F}$ -NMR,  $^{195}\text{Pt}$ -NMR, and ESI-MS spectra of complex **AC6C**.

**Figures S74-S78.**  $^1\text{H}$ -NMR,  $^{13}\text{C}$ -NMR,  $^{19}\text{F}$ -NMR,  $^{195}\text{Pt}$ -NMR, and ESI-MS spectra of complex **AC8C**.

**Figure S79.** Purity of complexes **OH2C-OH8C** and **AC2C-AC8C**.

**Figure S80.** Absorbance and emission of BODIPY ligand.

**Figure S81.** Molar extinction coefficients of complexes **OH2C-OH8C**.

**Figure S82.** Molar extinction coefficients of complexes **AC2C-AC8C**.

**Figure S83.** Stability of complexes **OH2C-OH8C** in PBS by HPLC.

**Figure S84.** Stability of complexes **AC2C-AC8C** in PBS by HPLC.

**Figure S85.** Reduction and photoactivation of complexes **OH2C-OH8C** and **AC2C-AC8C** in PBS with ascorbate.

**Figure S86.** Reduction of complexes **OH2C-OH8C** in PBS with ascorbate by HPLC.

**Figure S87.** Reduction of complexes **AC2C-AC8C** in PBS with ascorbate by HPLC.

**Figure S88.** Photoactivation of complexes **OH2C-OH8C** under white light in PBS by HPLC.

**Figure S89.** Photoactivation of complexes **AC2C-AC8C** under white light in PBS by HPLC.

**Figure S90.** Photoactivation of complexes **OH2C-OH8C** under white light in PBS with ascorbate by HPLC.

**Figure S91.** Photoactivation of complexes **AC2C-AC8C** under white light in PBS with ascorbate by HPLC.

**Table S1.** Cellular accumulation of complexes carboplatin, **OH2C-OH8C**, and **AC2C-AC8C** in A2780 cells.

**Table S2.** IC<sub>50</sub> of complexes carboplatin, **OH2C-OH8C**, and **AC2C-AC8C** in A2780 cells.



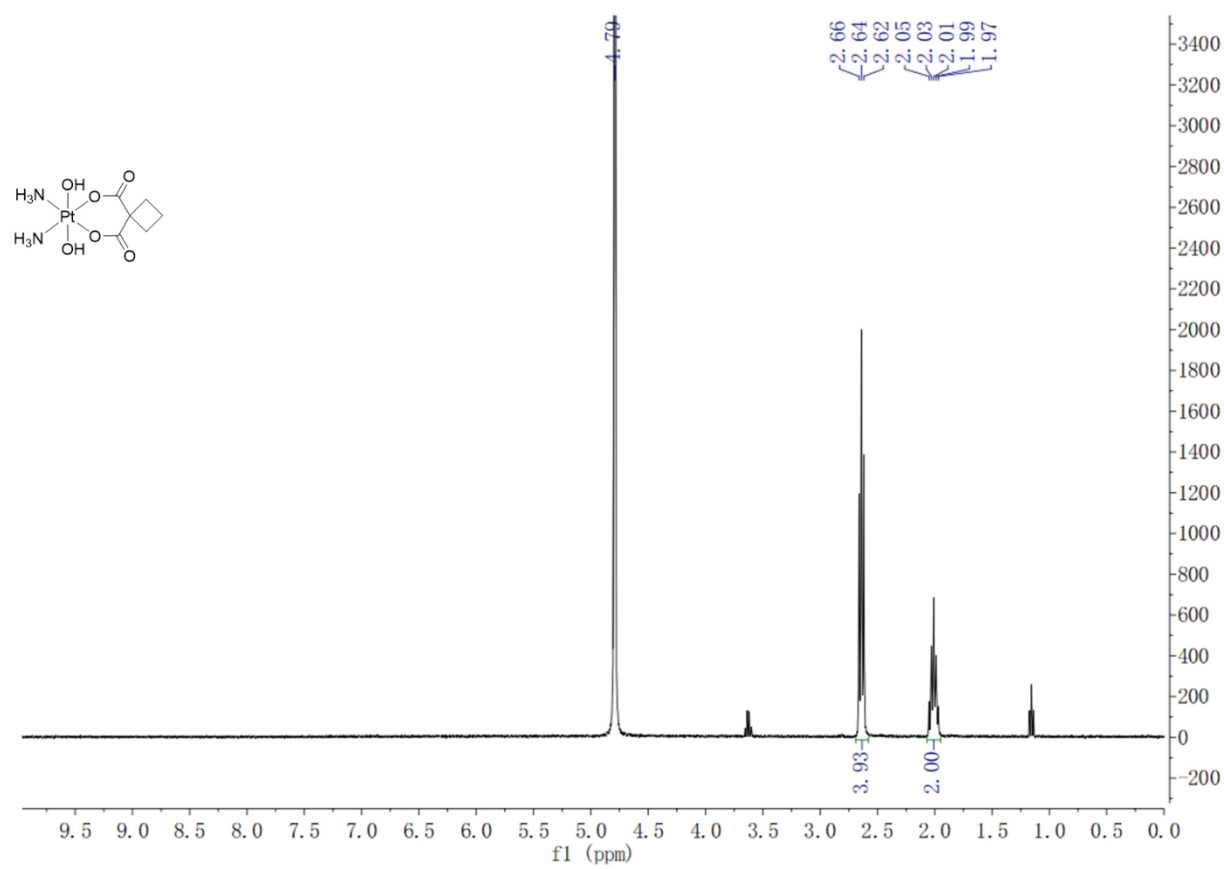

**Figure S1.** <sup>1</sup>H-NMR spectrum of compound **1** in D<sub>2</sub>O.

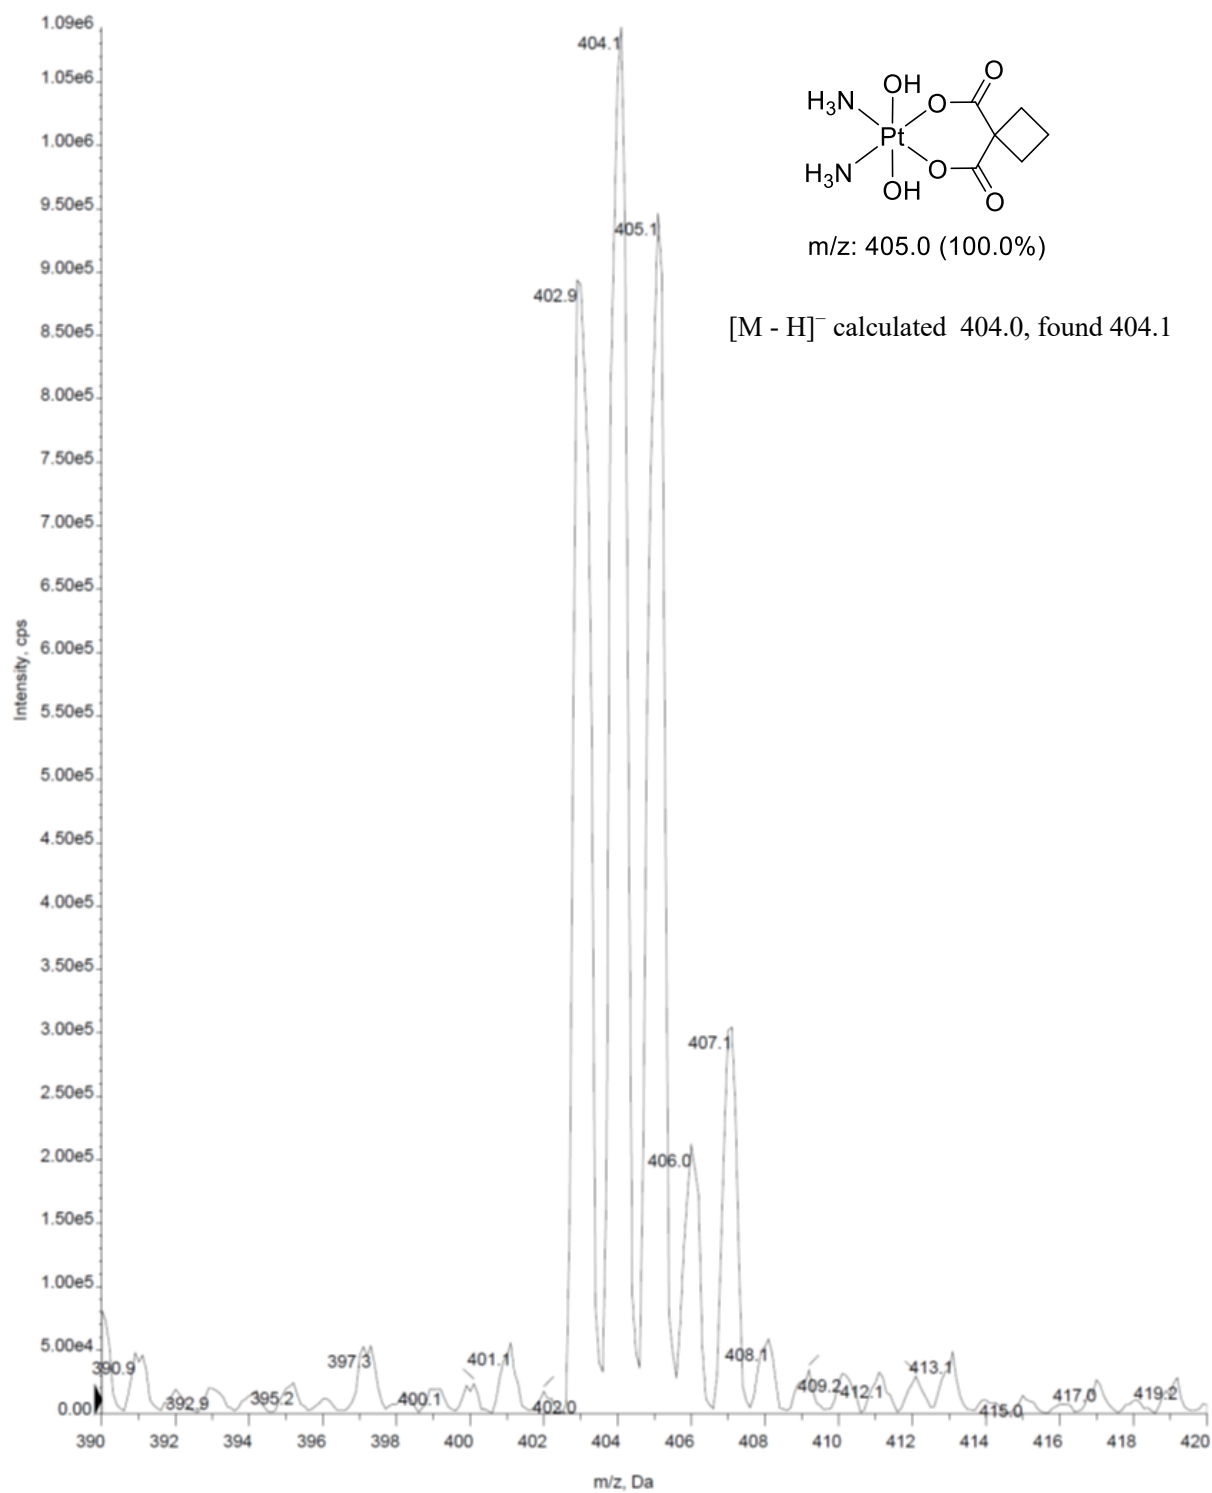

**Figure S2.** ESI-MS spectrum of compound **1**, negative mode in methanol.

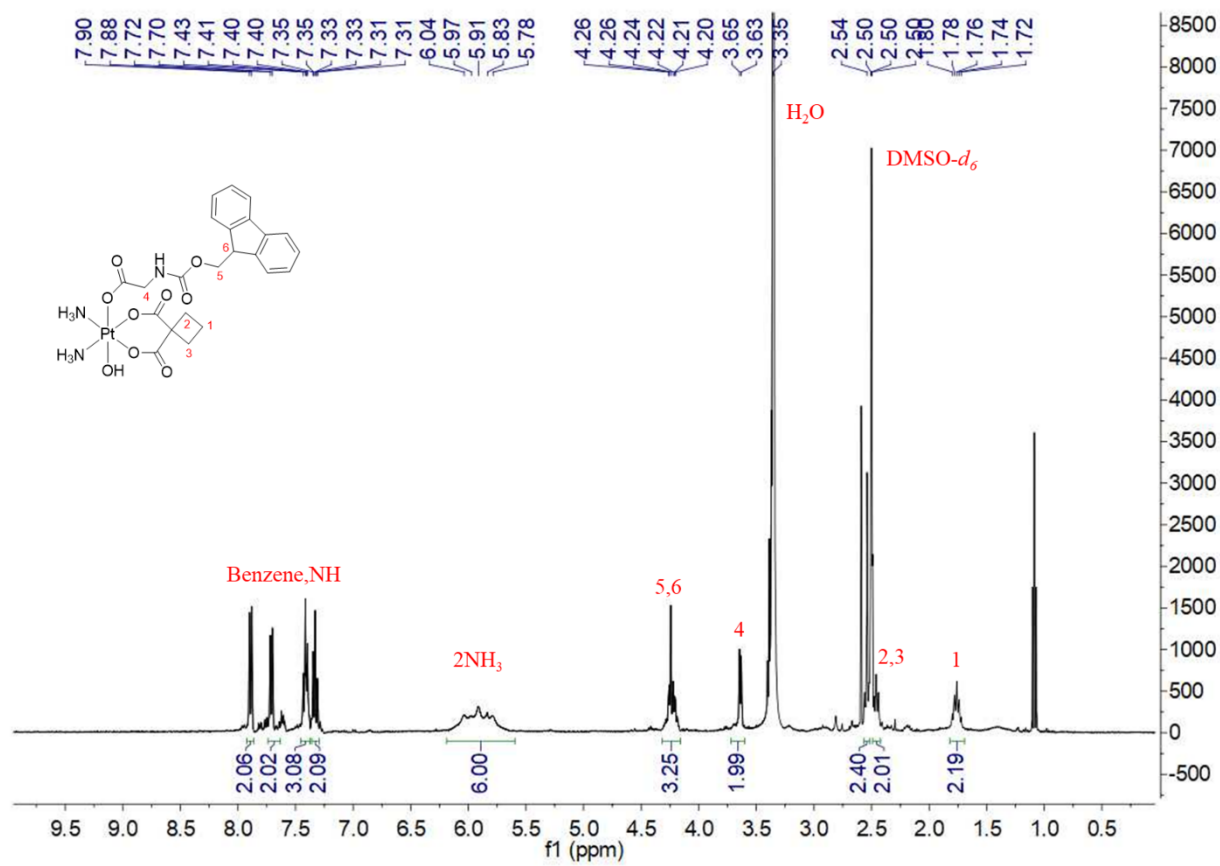

**Figure S3.** <sup>1</sup>H-NMR spectrum of compound **6** in DMSO-*d*<sub>6</sub>.

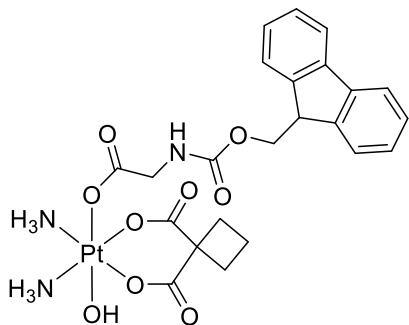

**Figure S4.** ESI-MS spectrum of compound **6**, negative mode in methanol.

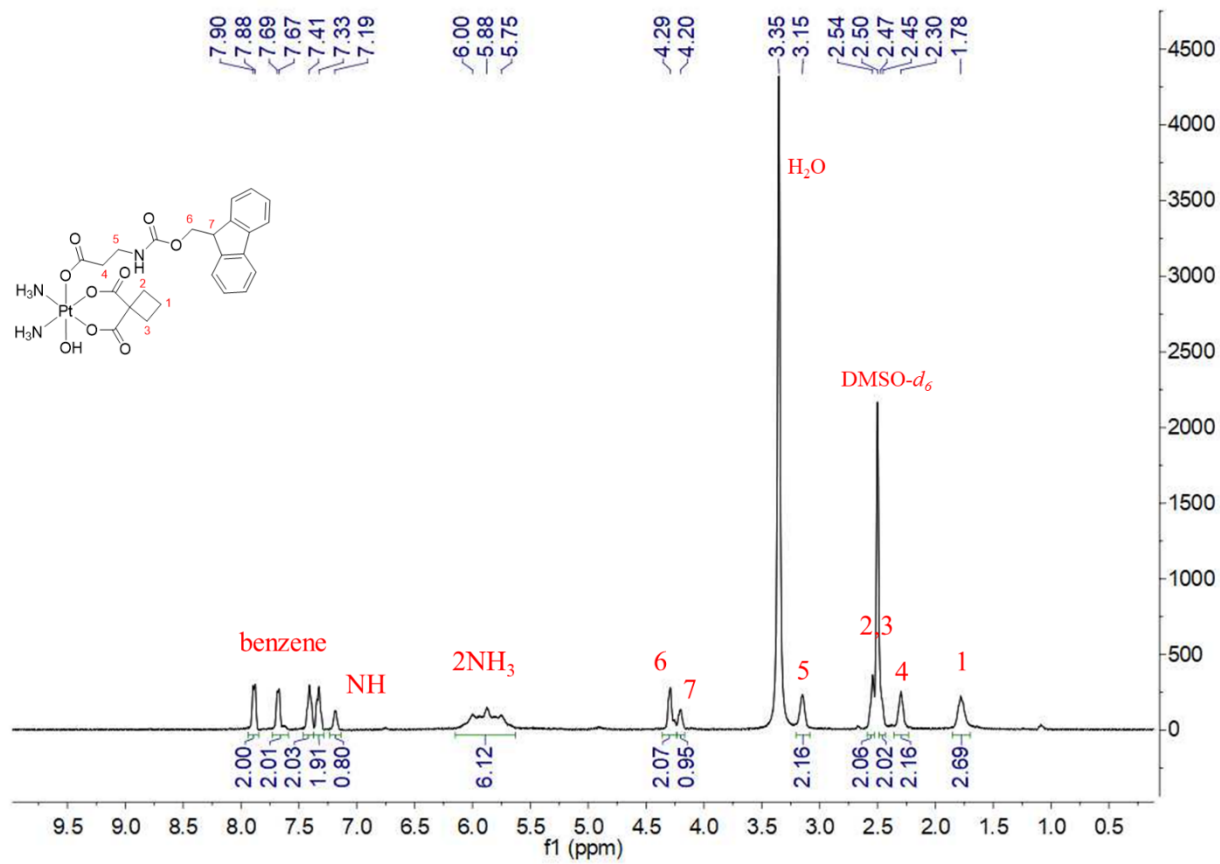

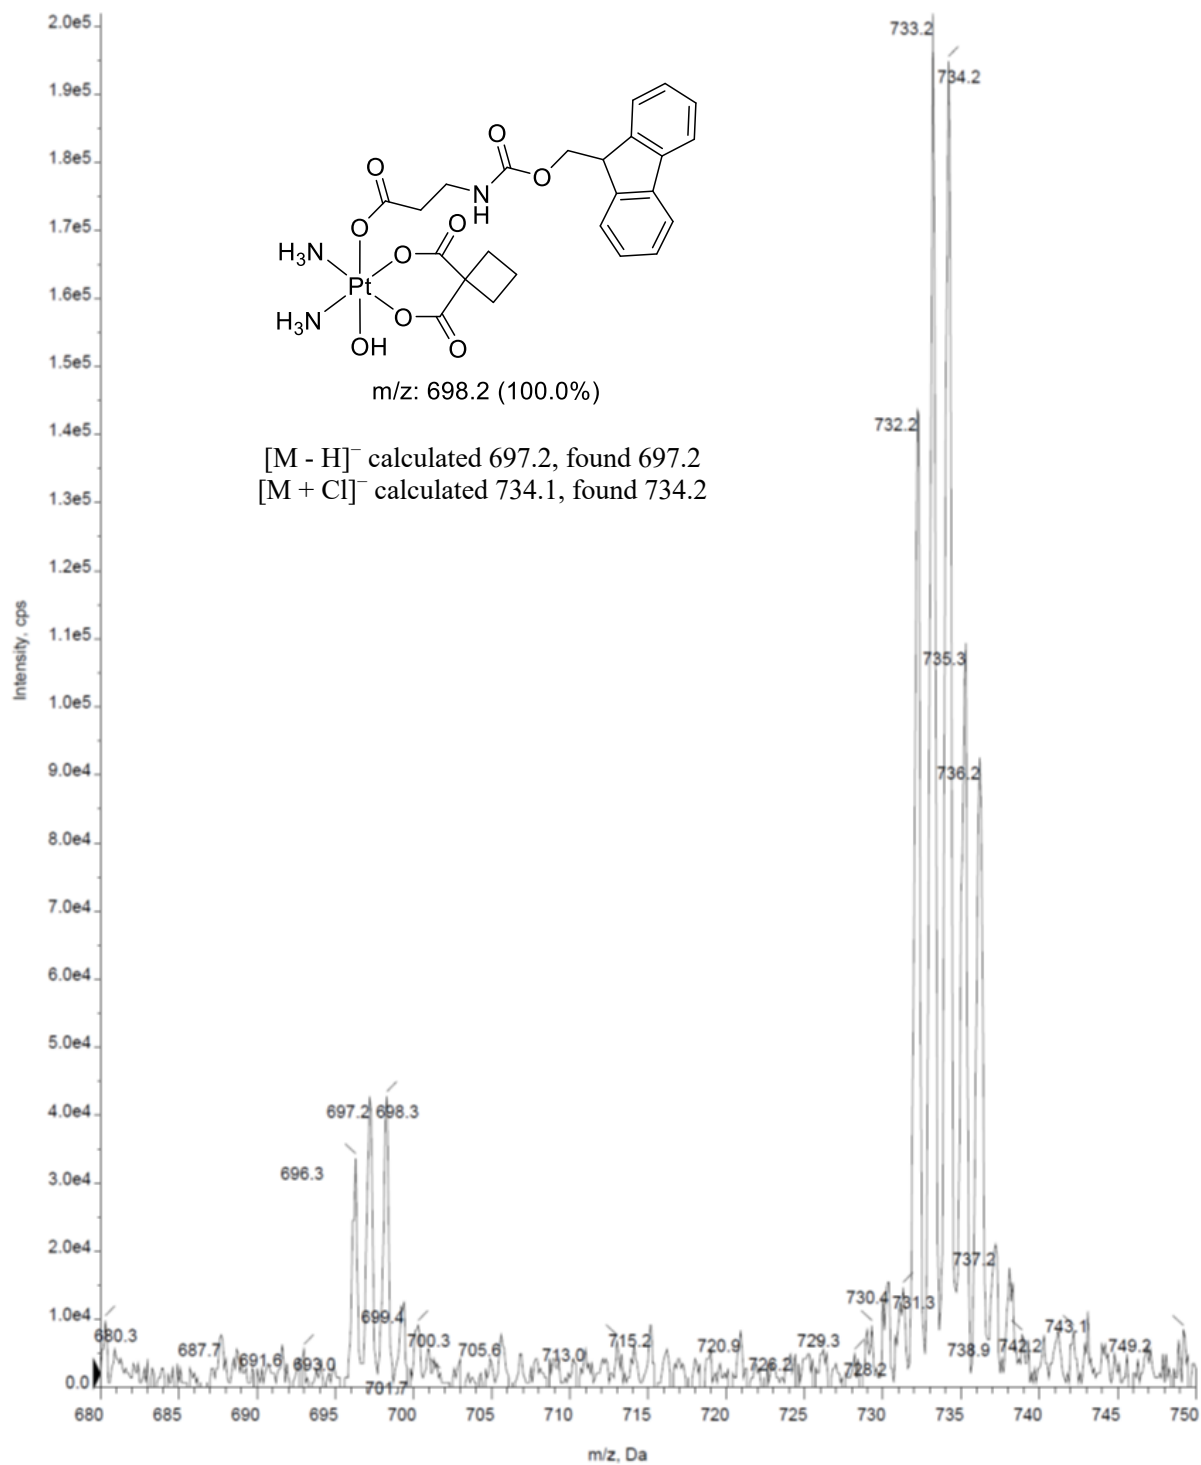

**Figure S6.** ESI-MS spectrum of compound **7**, negative mode in methanol.

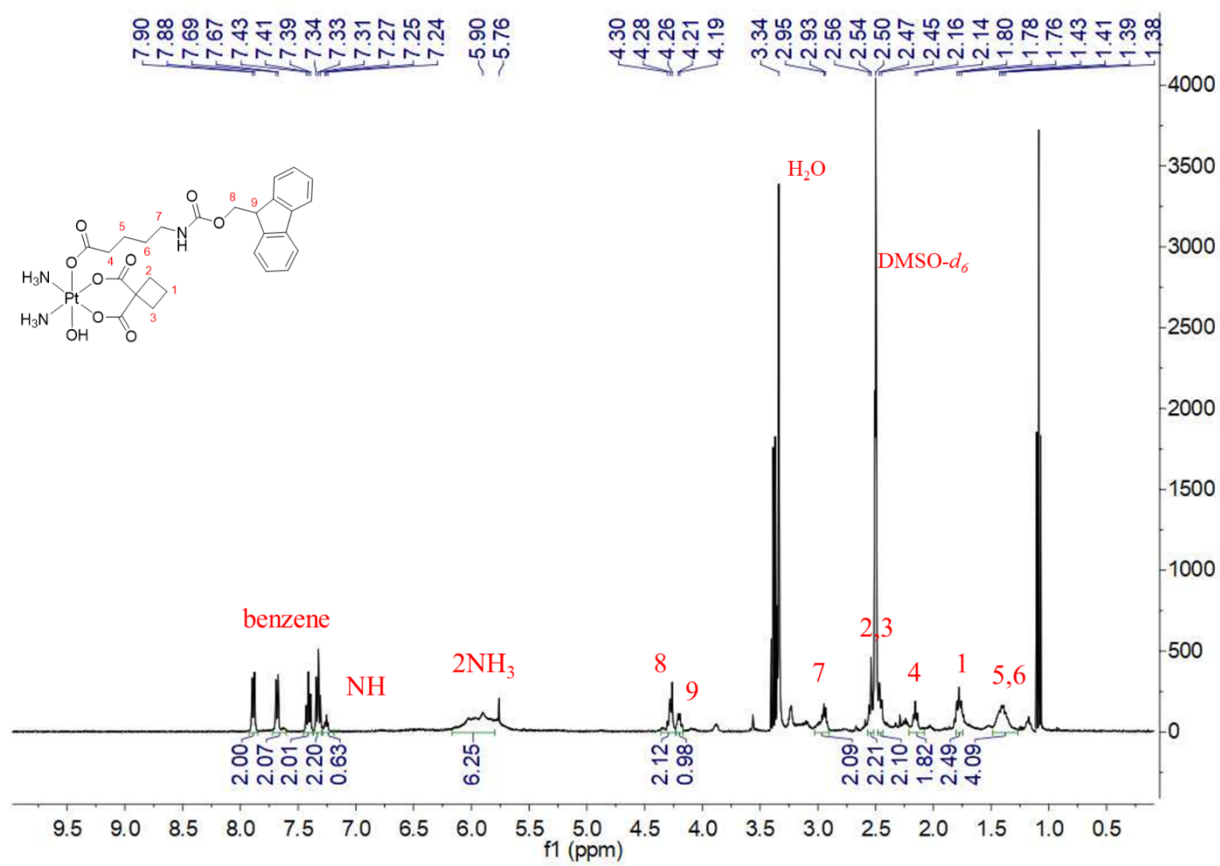

**Figure S7.** <sup>1</sup>H-NMR spectrum of compound **8** in DMSO-*d*<sub>6</sub>.

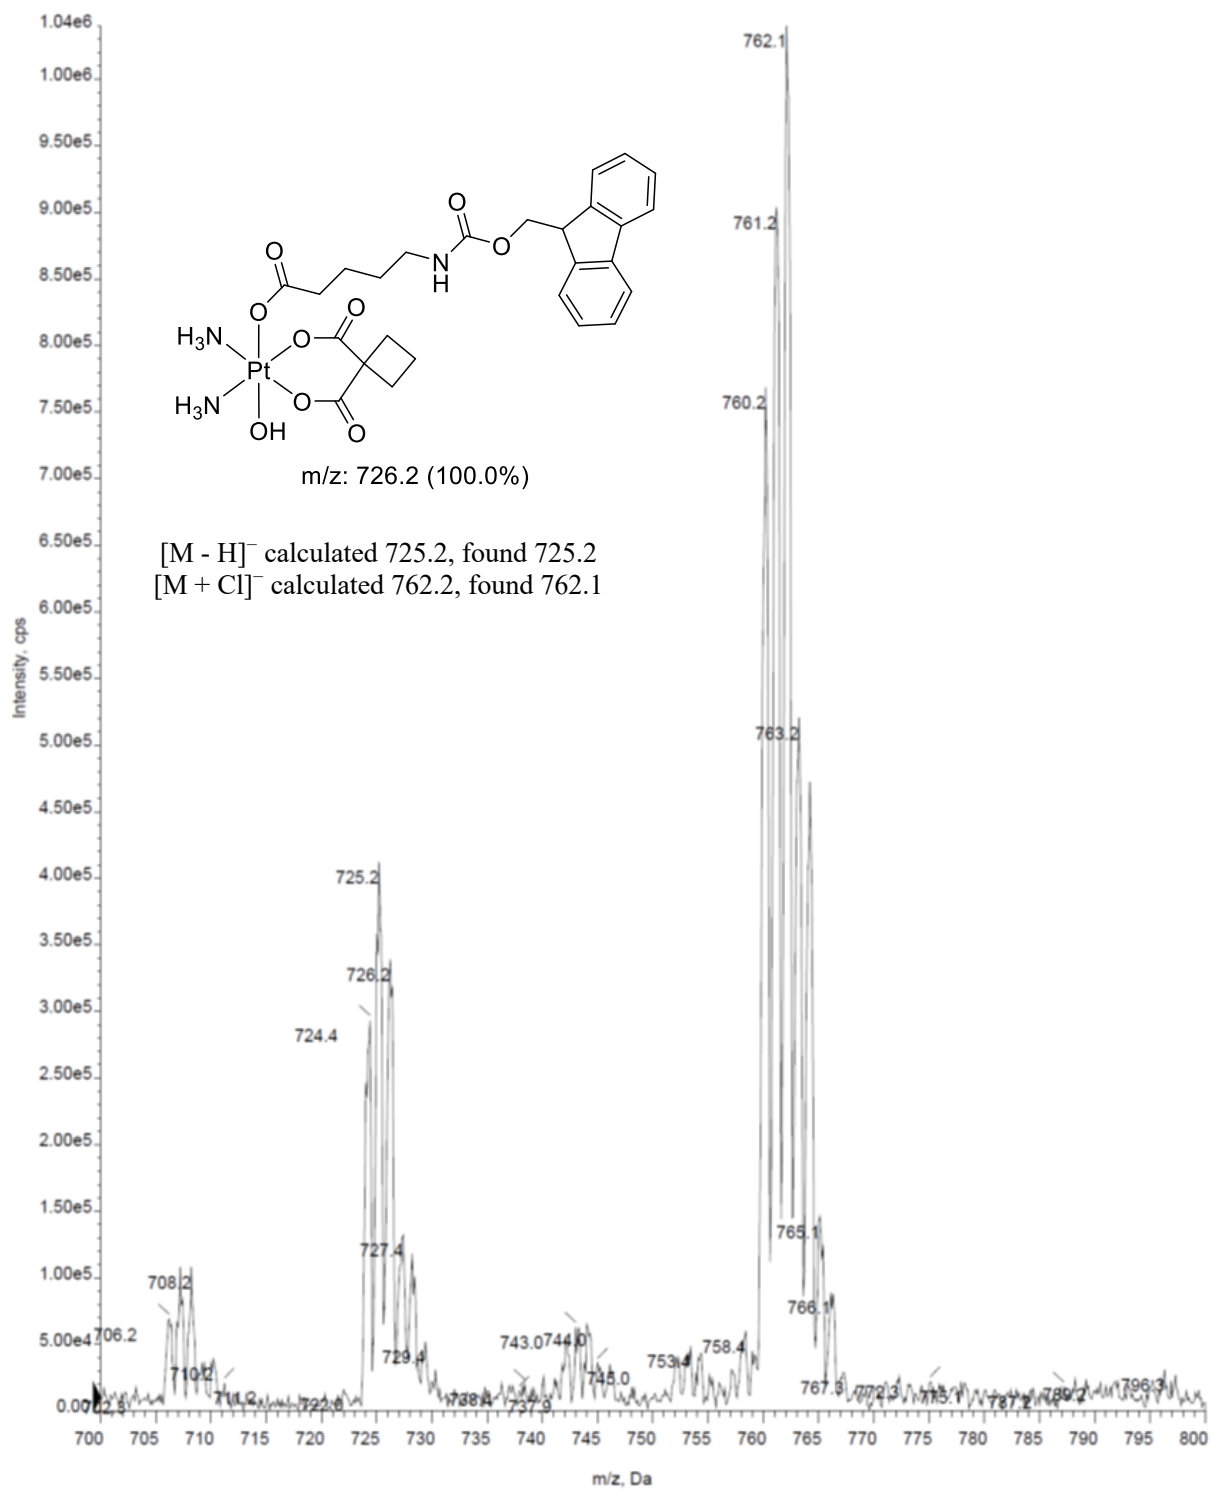

**Figure S8.** ESI-MS spectrum of compound **8**, negative mode in methanol.



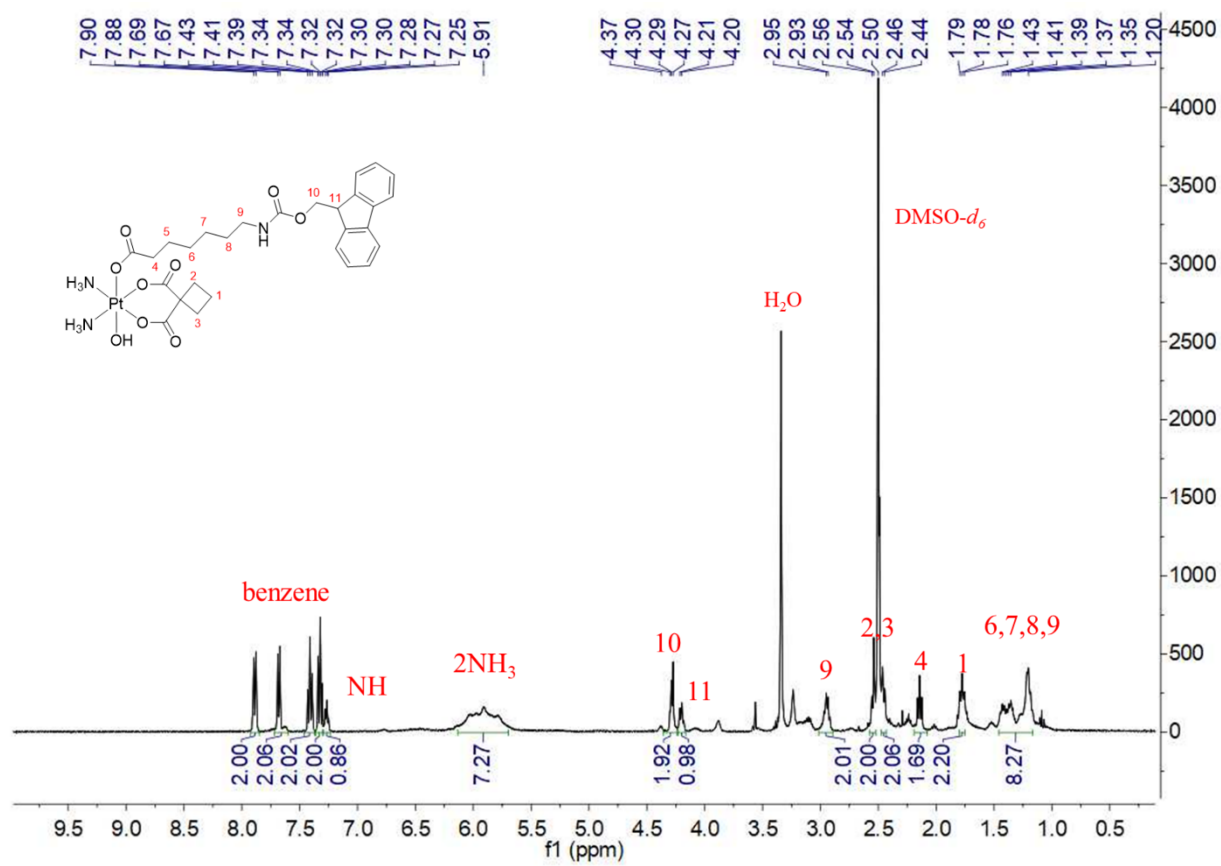

**Figure S9.** <sup>1</sup>H-NMR spectrum of compound **9** in DMSO-*d*<sub>6</sub>.

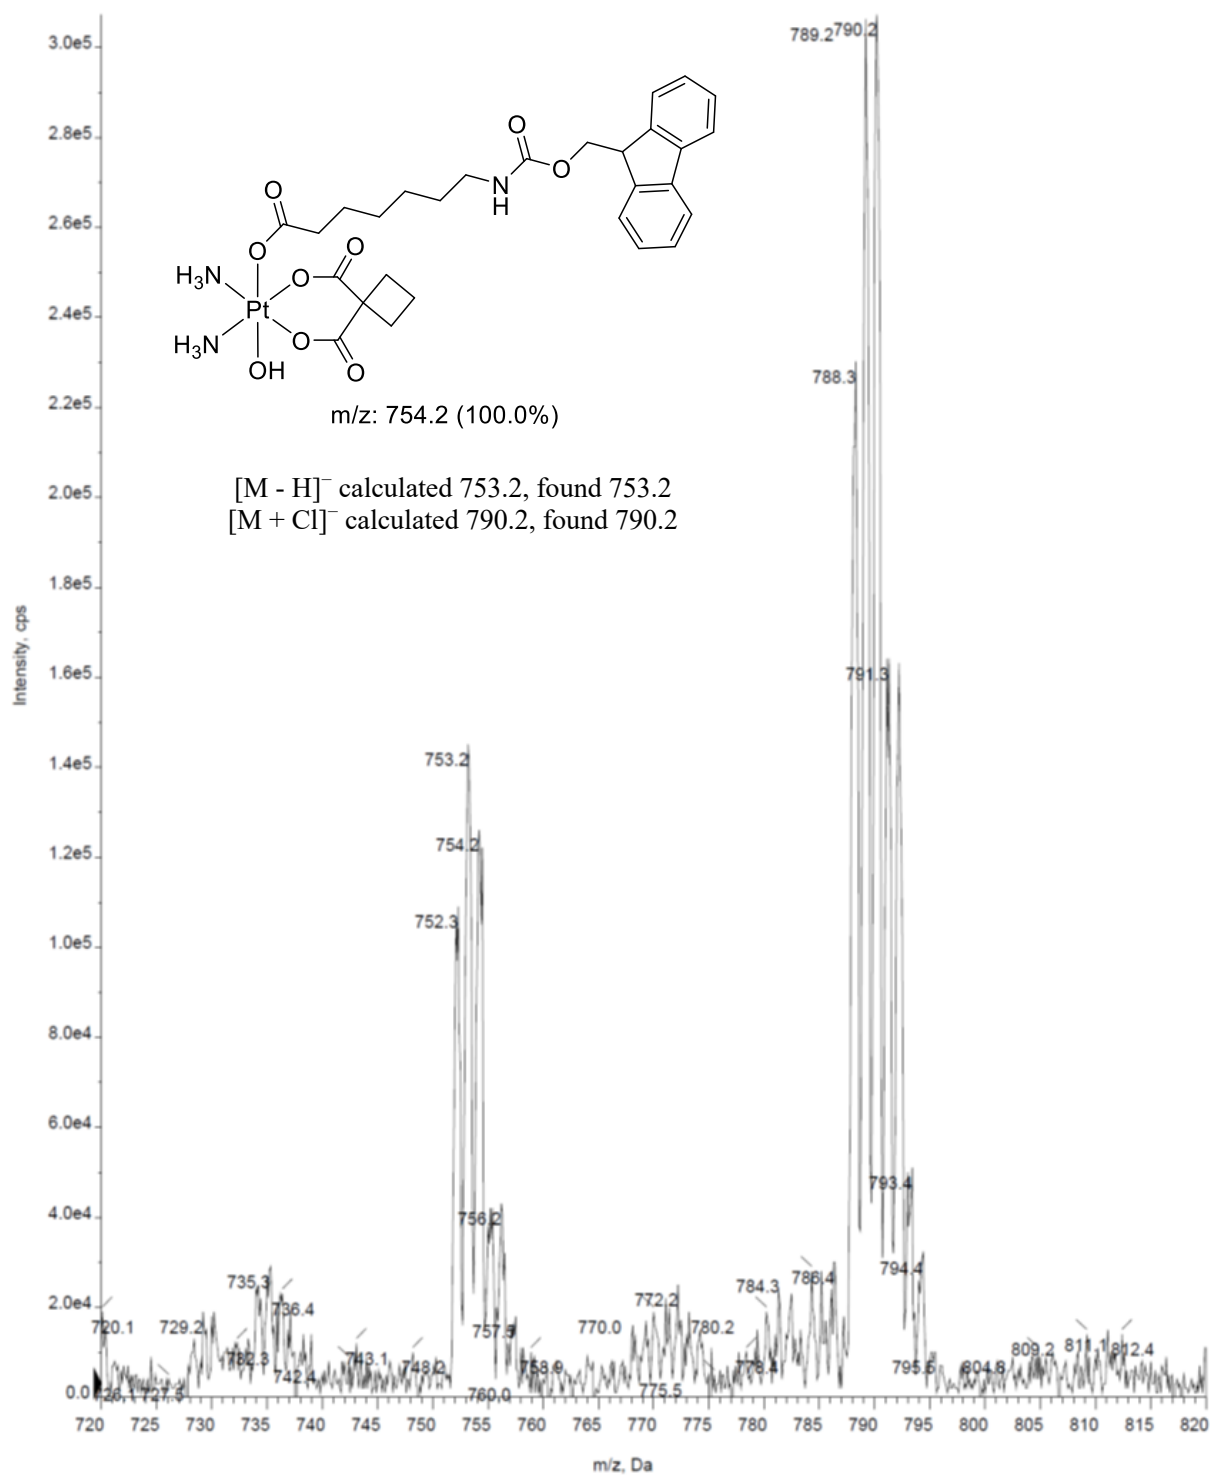

**Figure S10.** ESI-MS spectrum of compound **9**, negative mode in methanol.

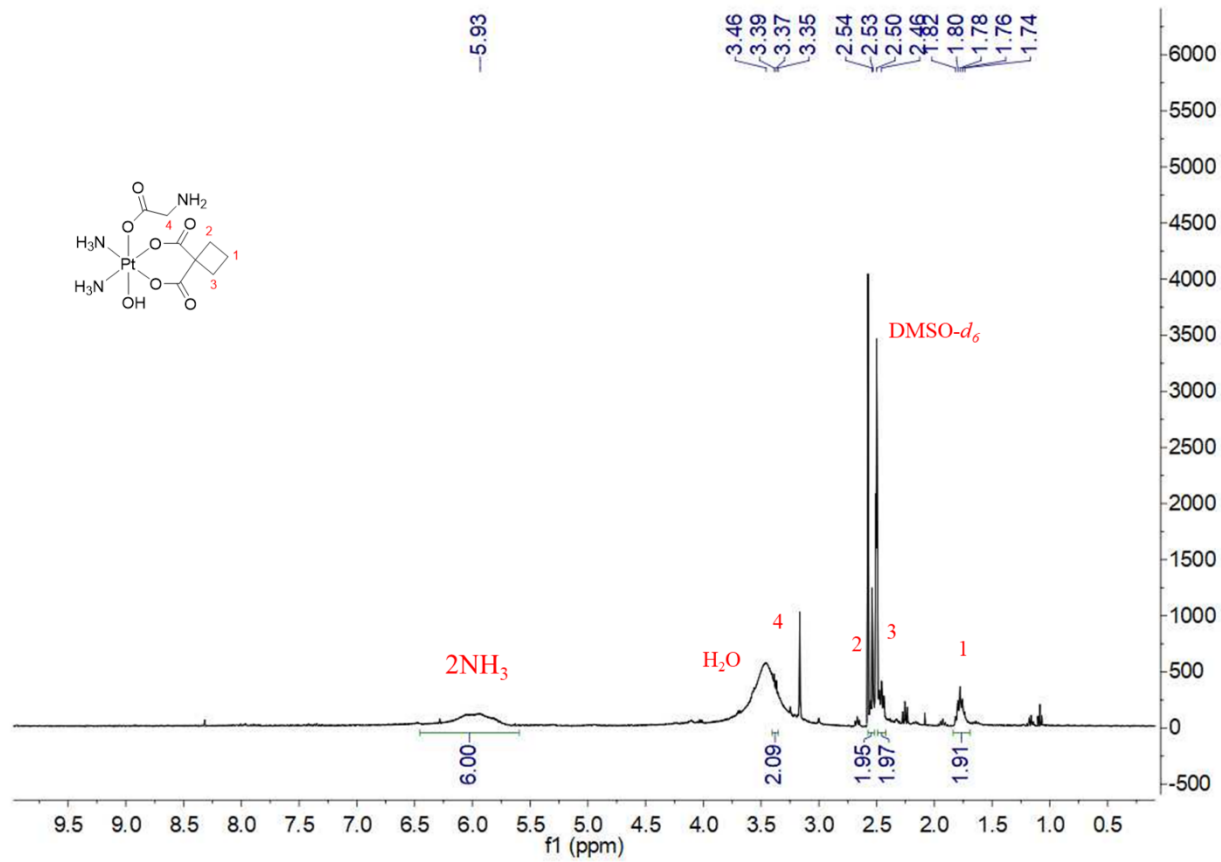

**Figure S11.** <sup>1</sup>H-NMR spectrum of compound **10** in DMSO-*d*<sub>6</sub>.

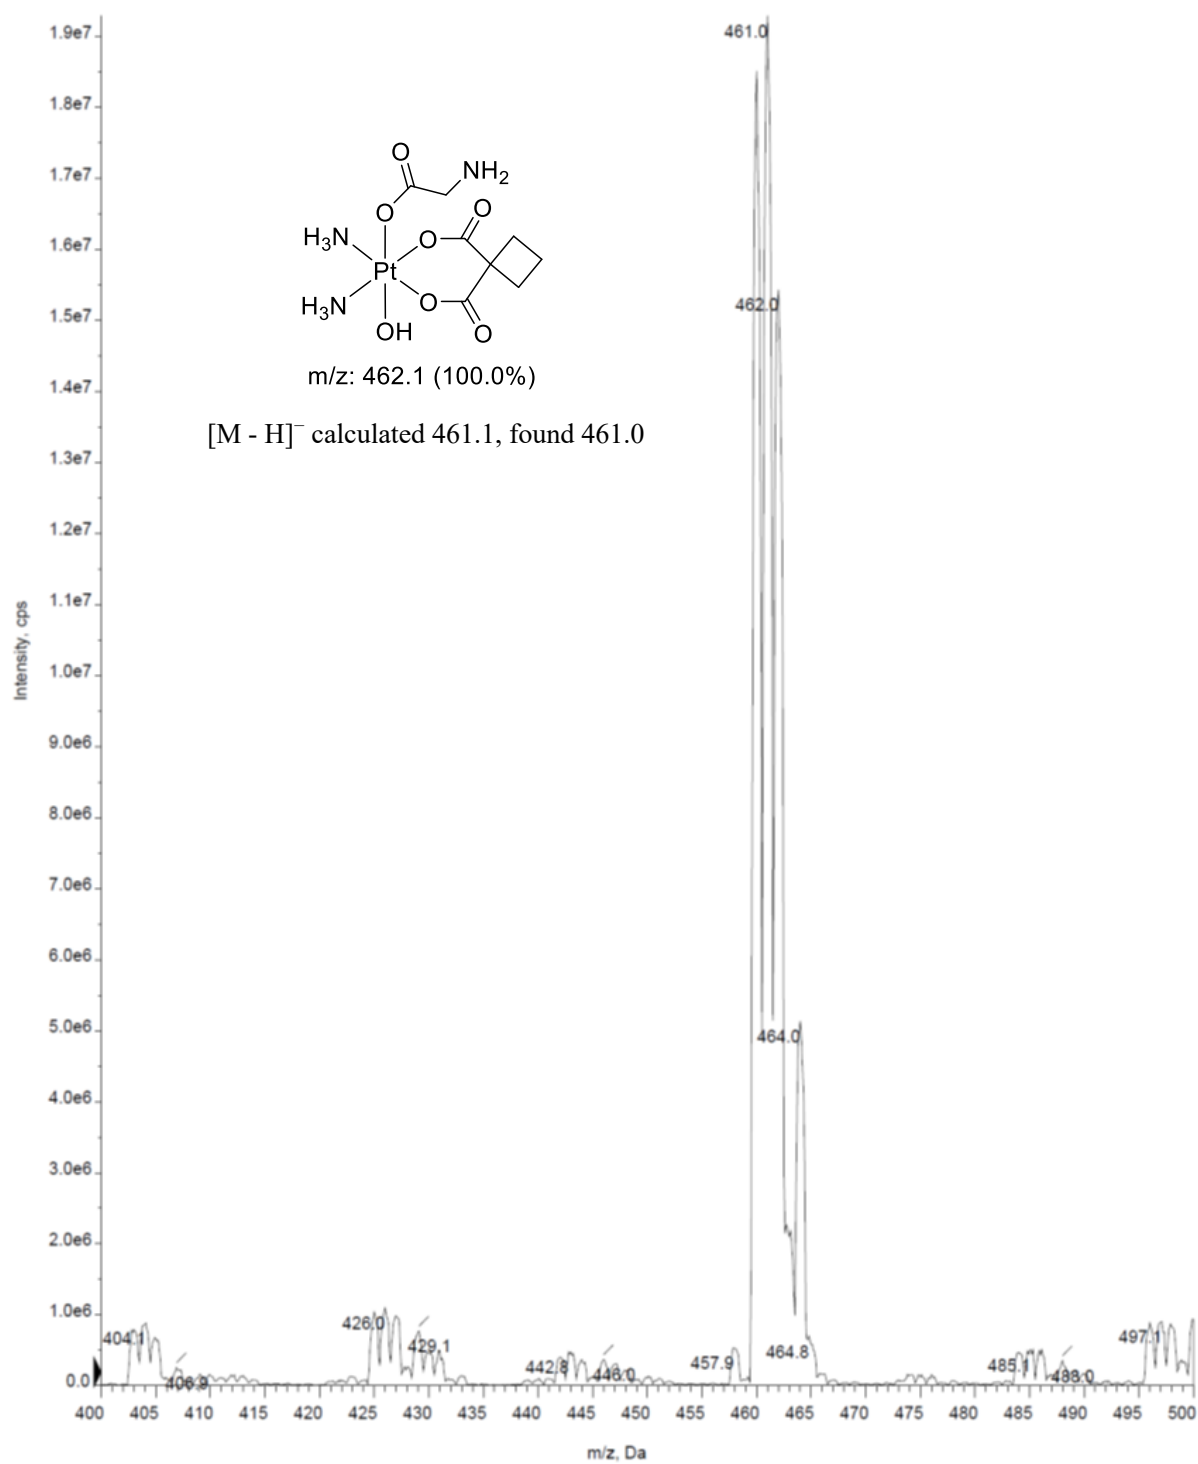

**Figure S12.** ESI-MS spectrum of compound **10**, negative mode in methanol.

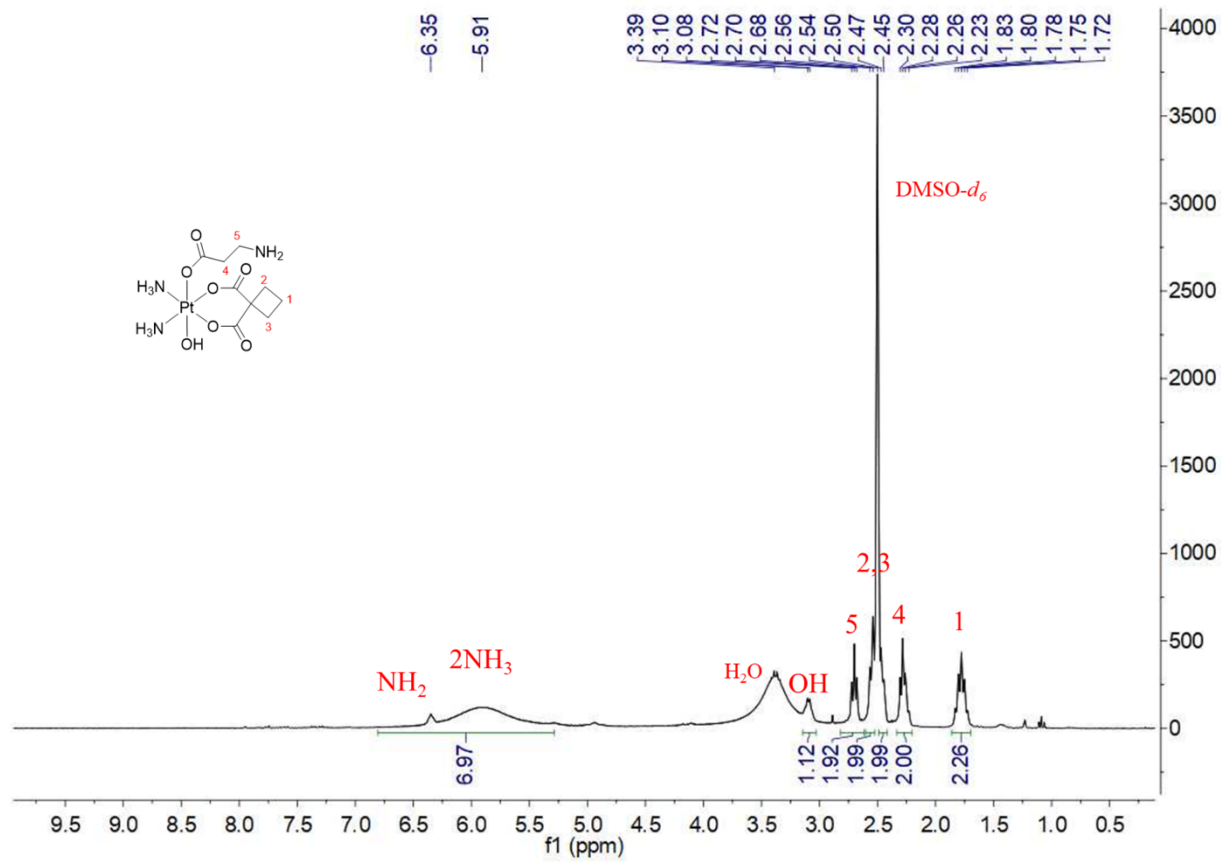

**Figure S13.** <sup>1</sup>H-NMR spectrum of compound **11** in DMSO-*d*<sub>6</sub>.

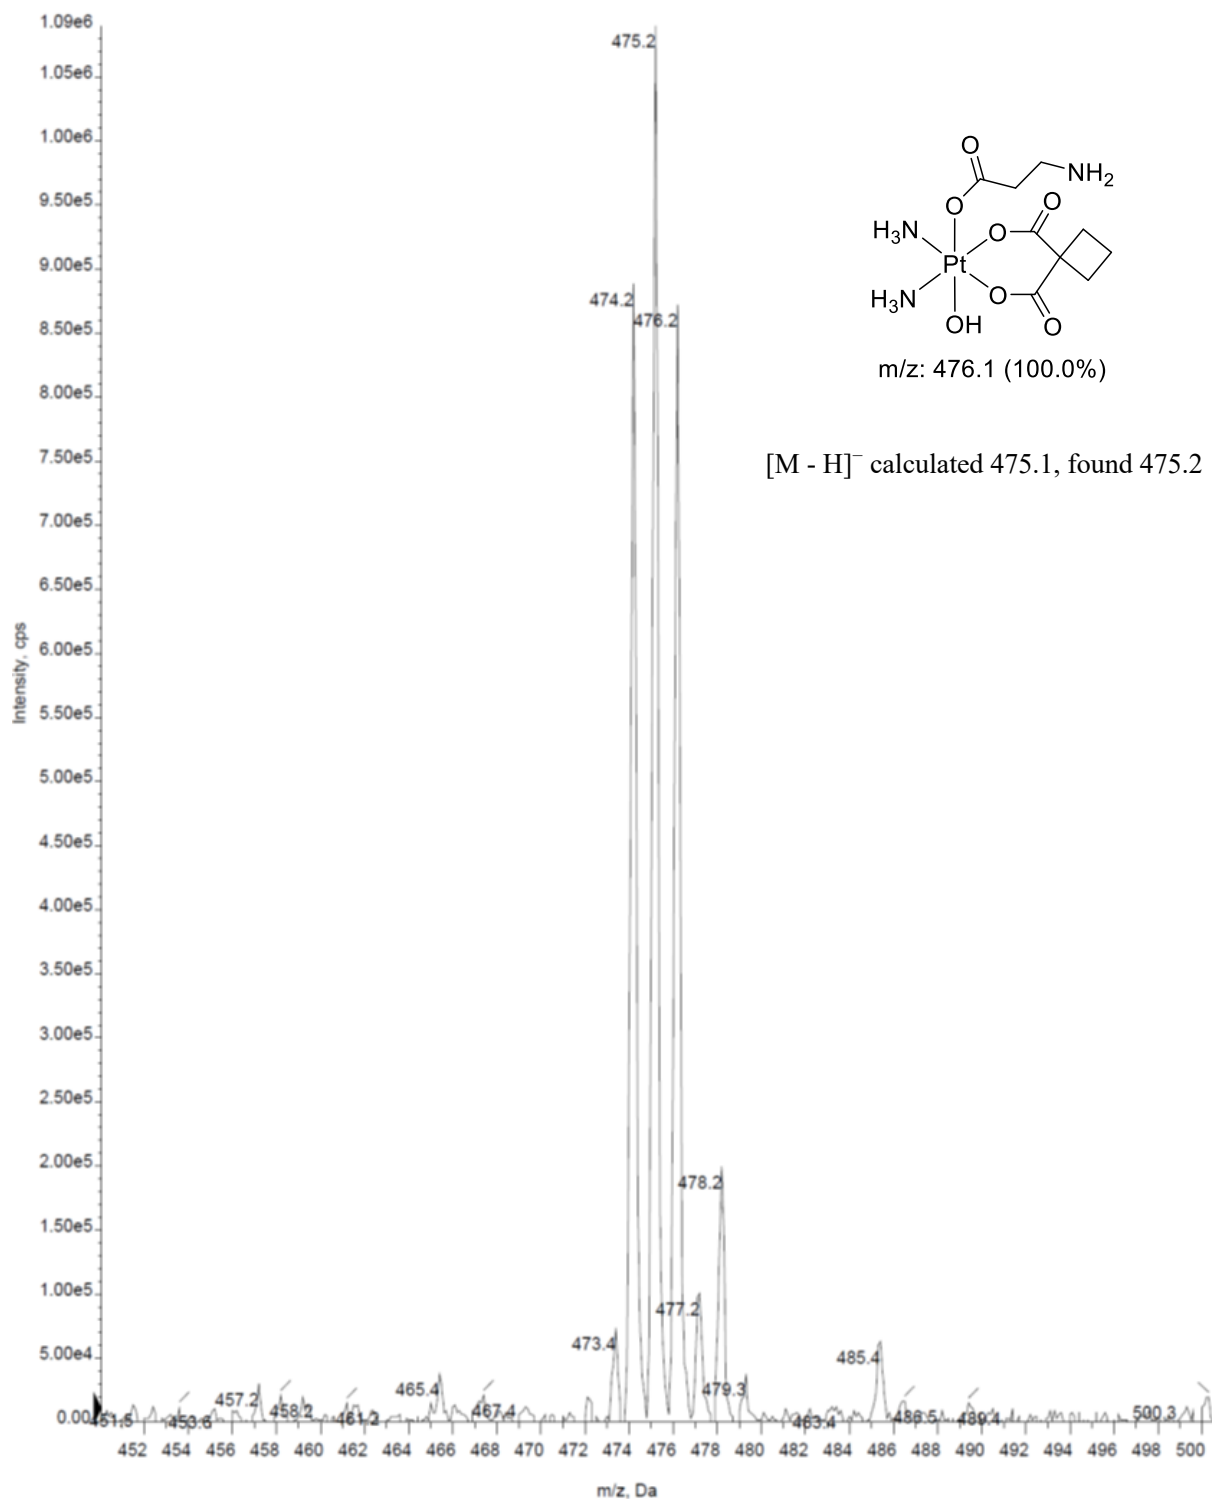

**Figure S14.** ESI-MS spectrum of compound **11**, negative mode in methanol.

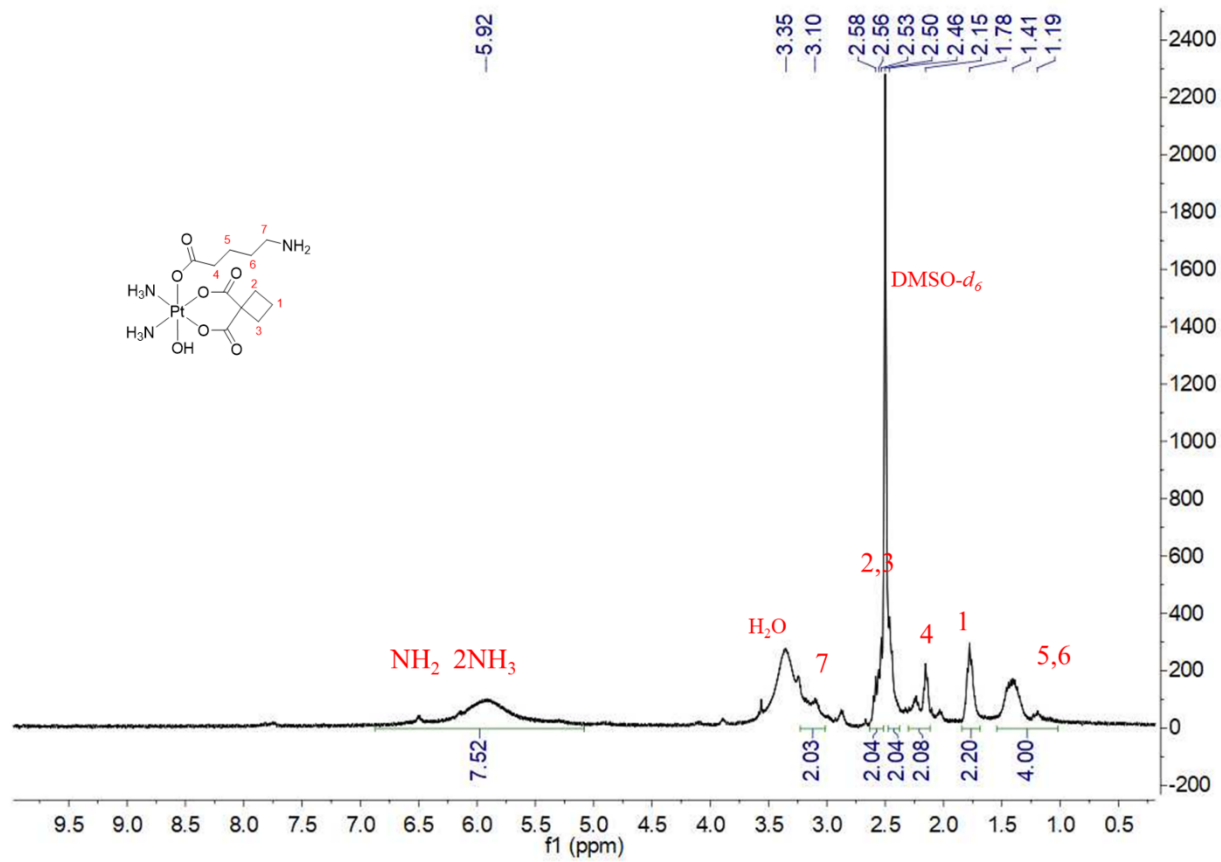

**Figure S15.** <sup>1</sup>H-NMR spectrum of compound **12** in DMSO-*d*<sub>6</sub>.

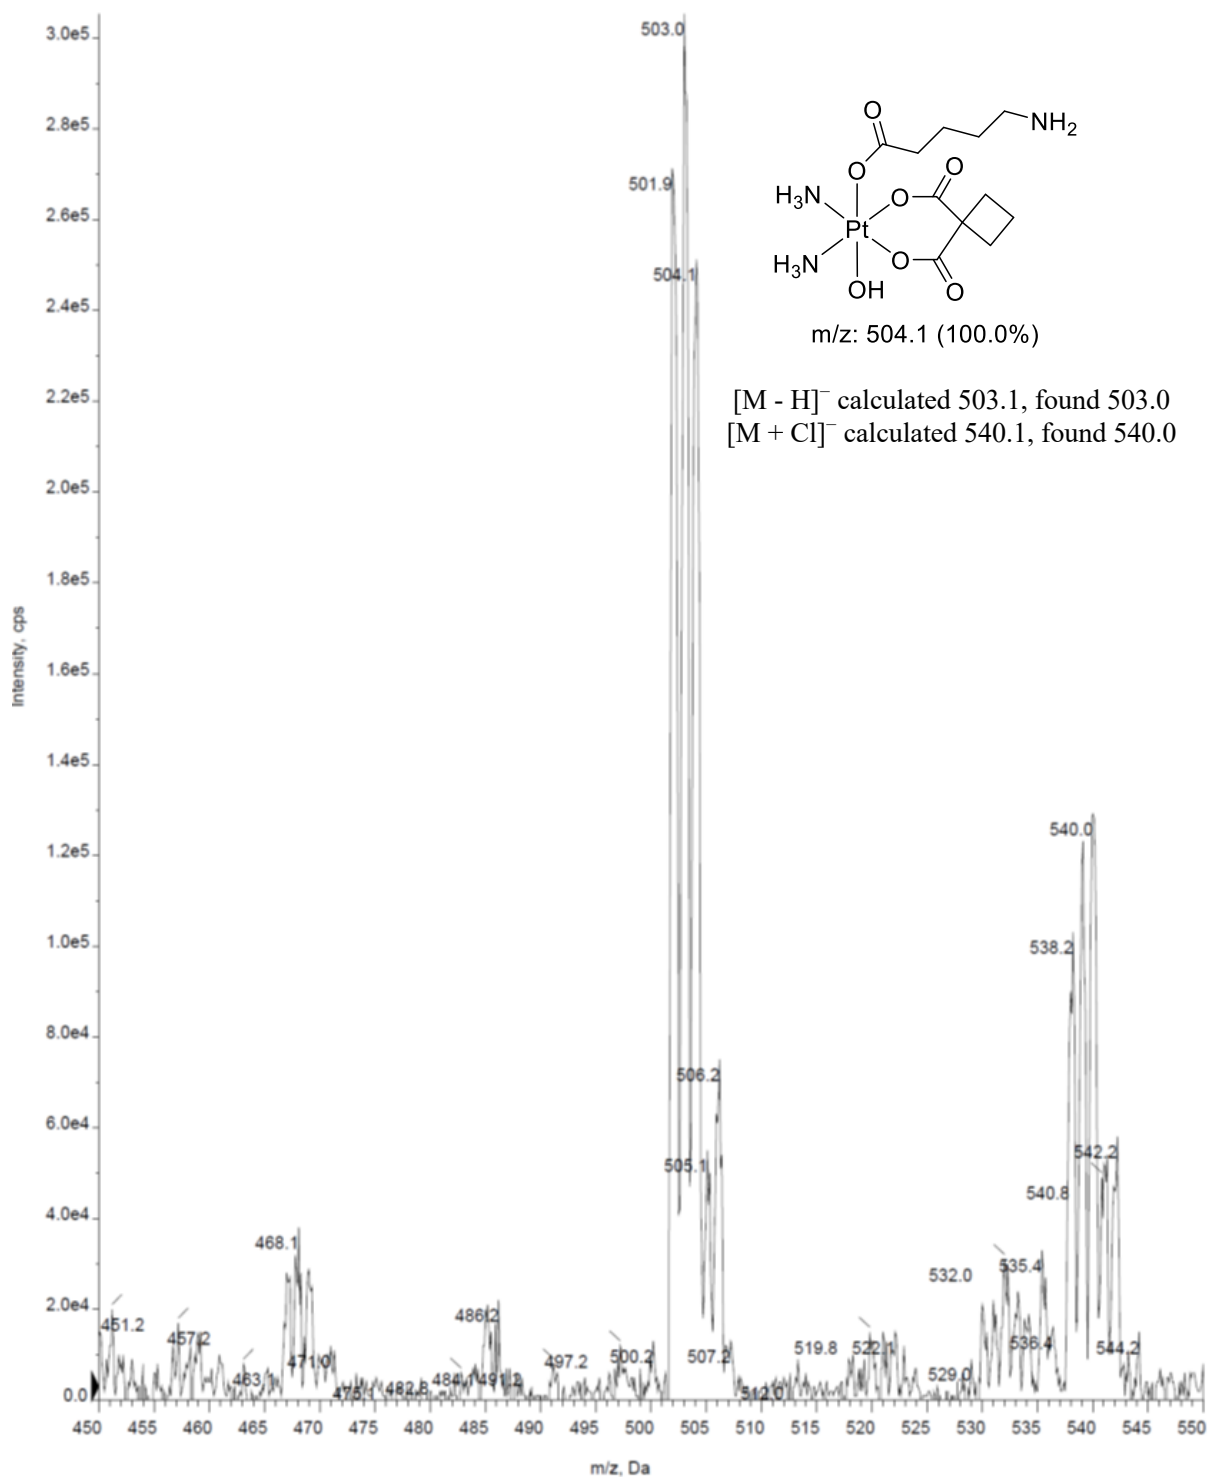

**Figure S16.** ESI-MS spectrum of compound **12**, negative mode in methanol.



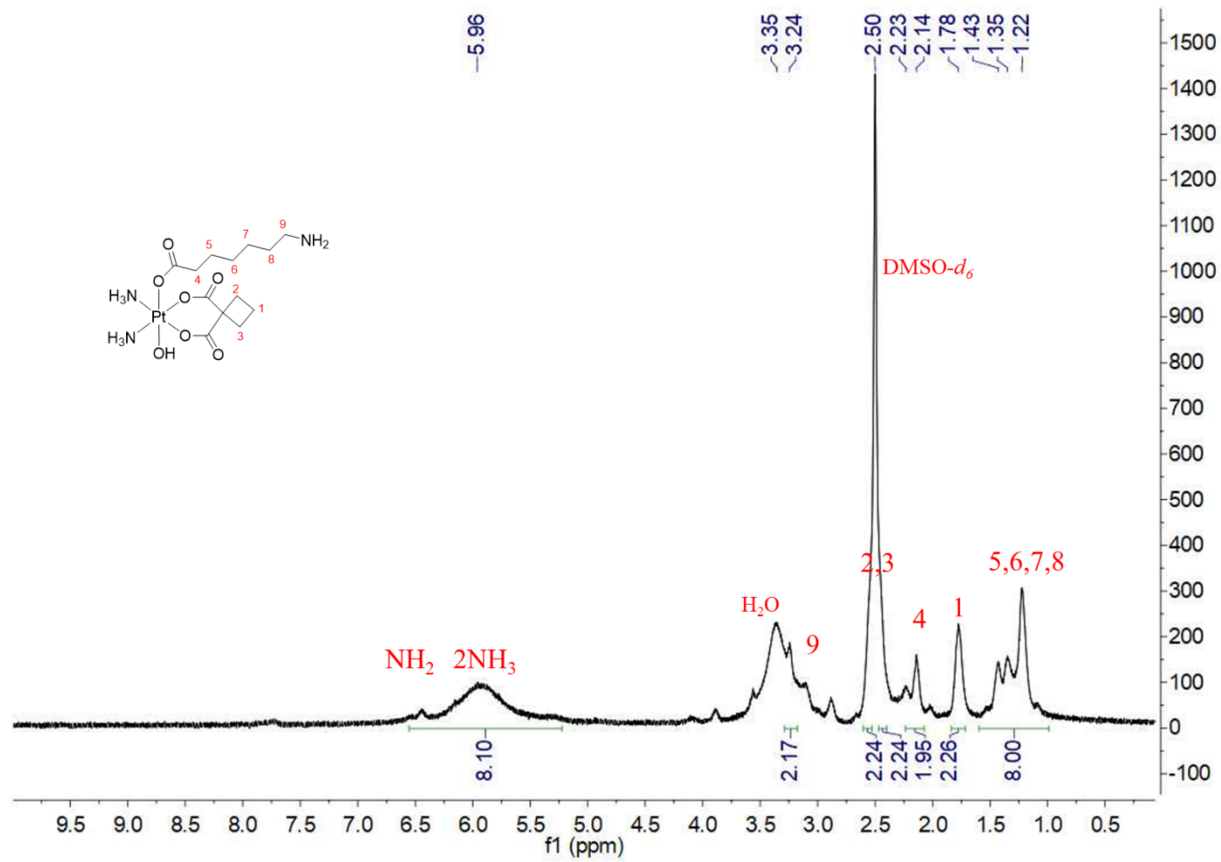

**Figure S17.** <sup>1</sup>H-NMR spectrum of compound **13** in DMSO-*d*<sub>6</sub>.

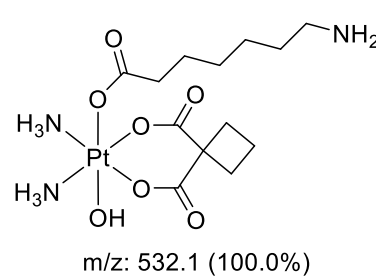

22



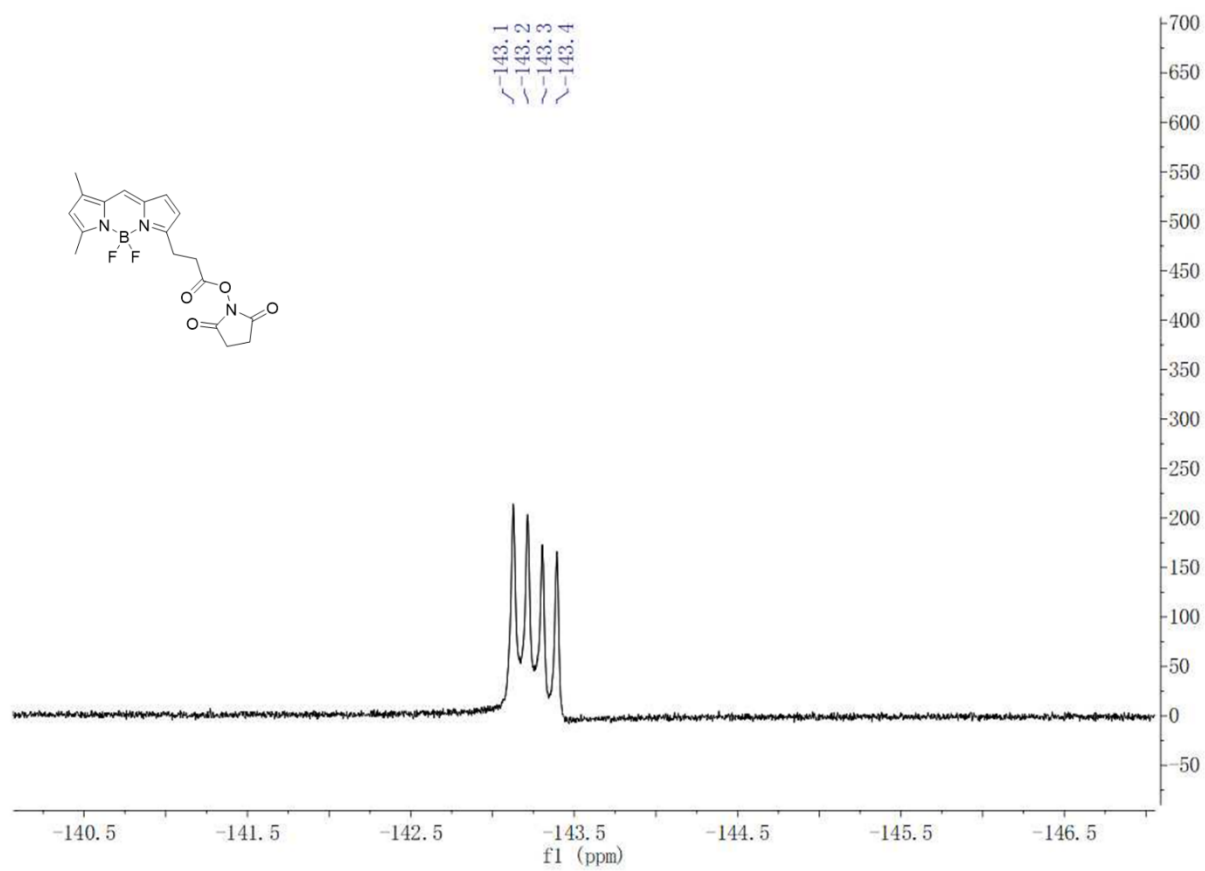

**Figure S20.**  $^{19}\text{F}$ -NMR spectrum of compound **14** in  $\text{DMSO}-d_6$ .

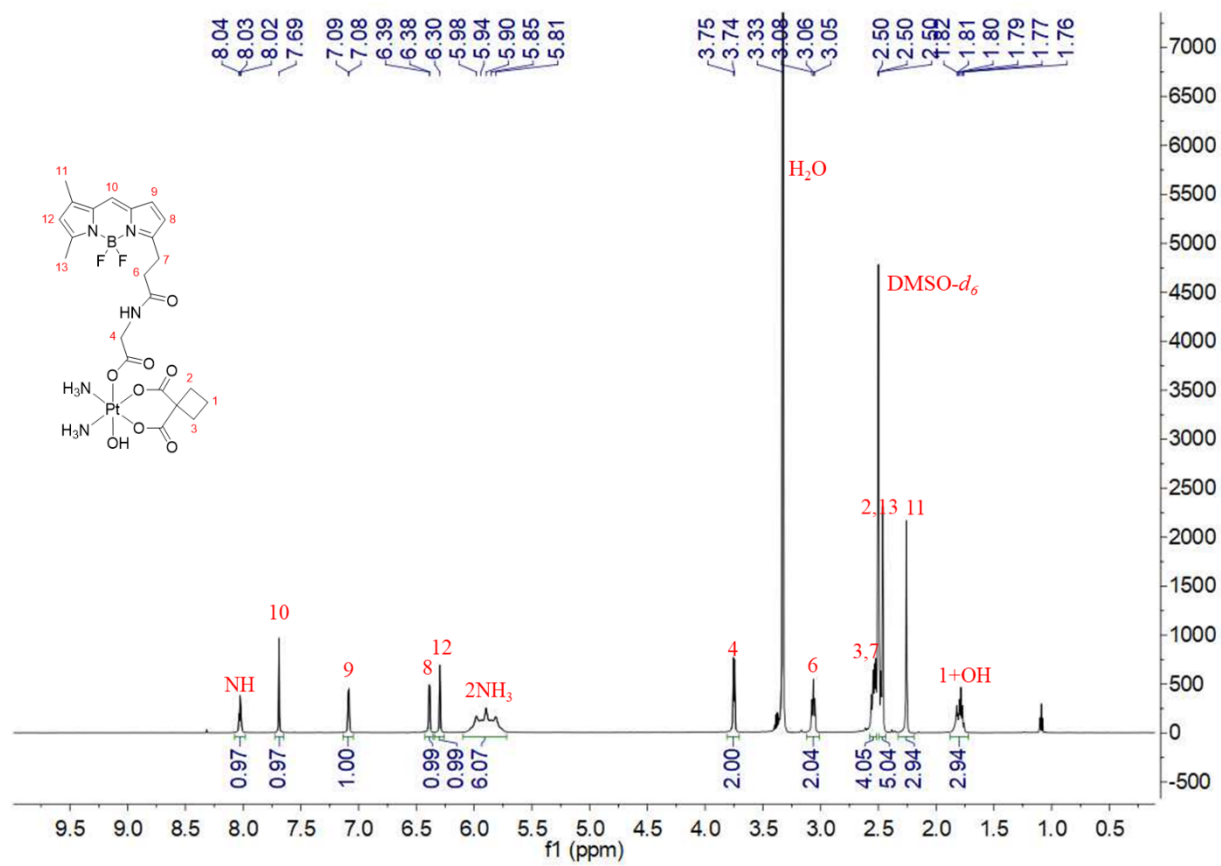

**Figure S21.** <sup>1</sup>H-NMR spectrum of complex **OH3C** in DMSO-*d*<sub>6</sub>.

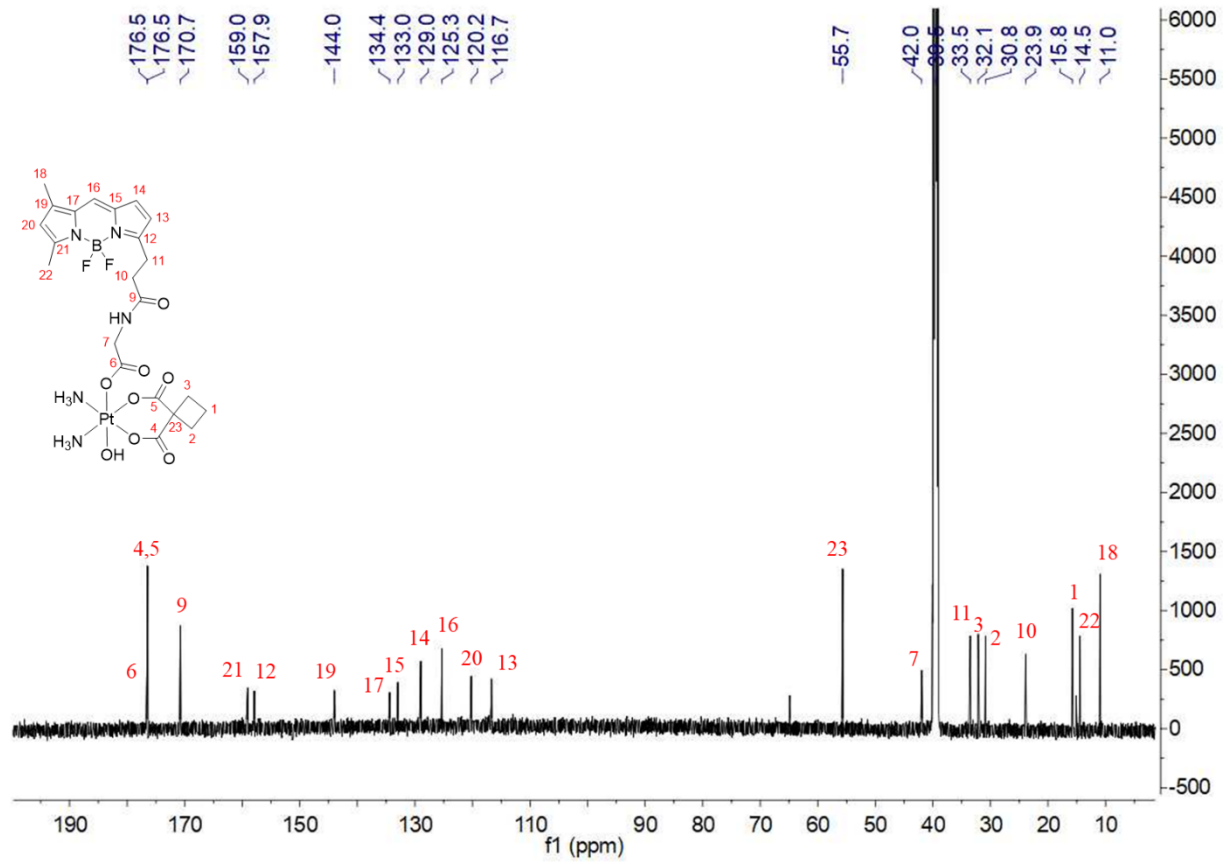

**Figure S22.** <sup>13</sup>C-NMR spectrum of complex **OH3C** in DMSO-*d*<sub>6</sub>.

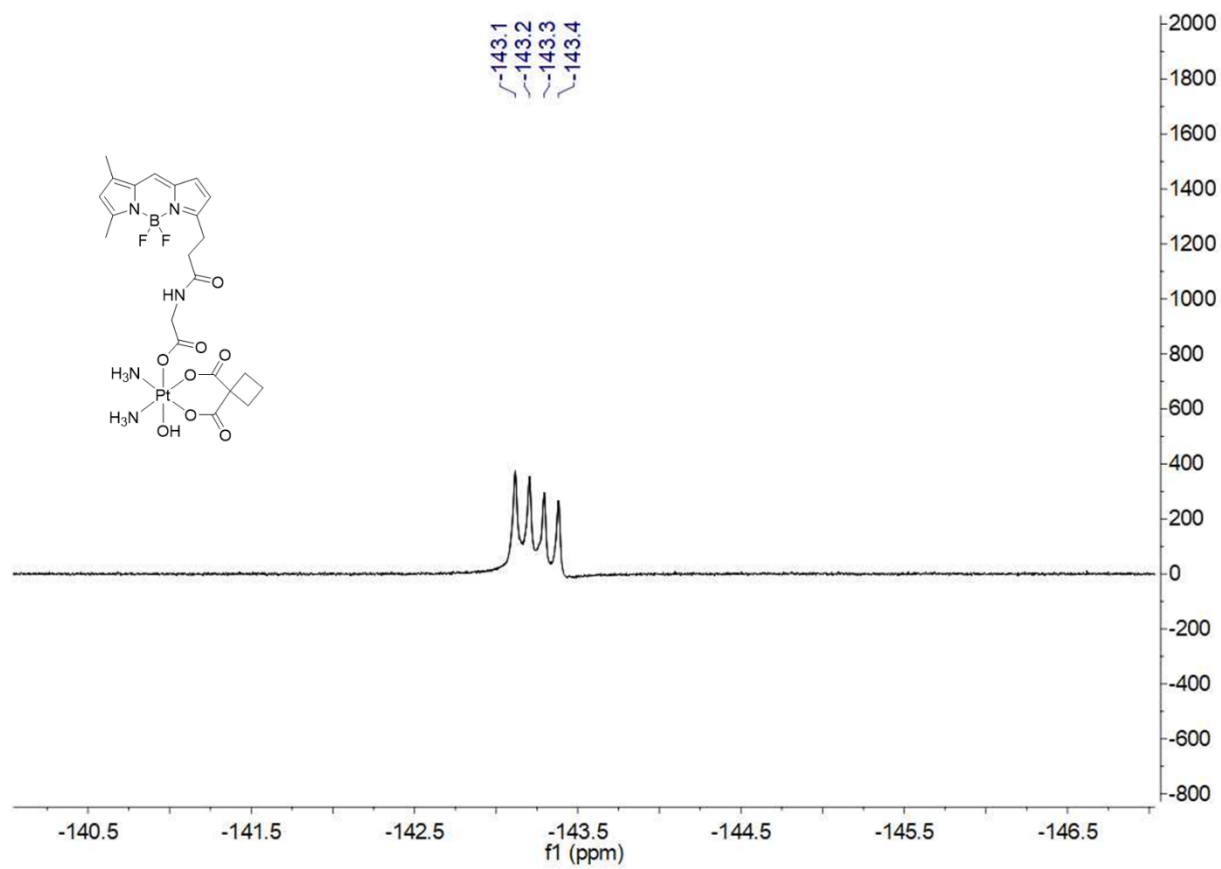

**Figure S23.**  $^{19}\text{F}$ -NMR spectrum of complex **OH3C** in  $\text{DMSO-}d_6$ .

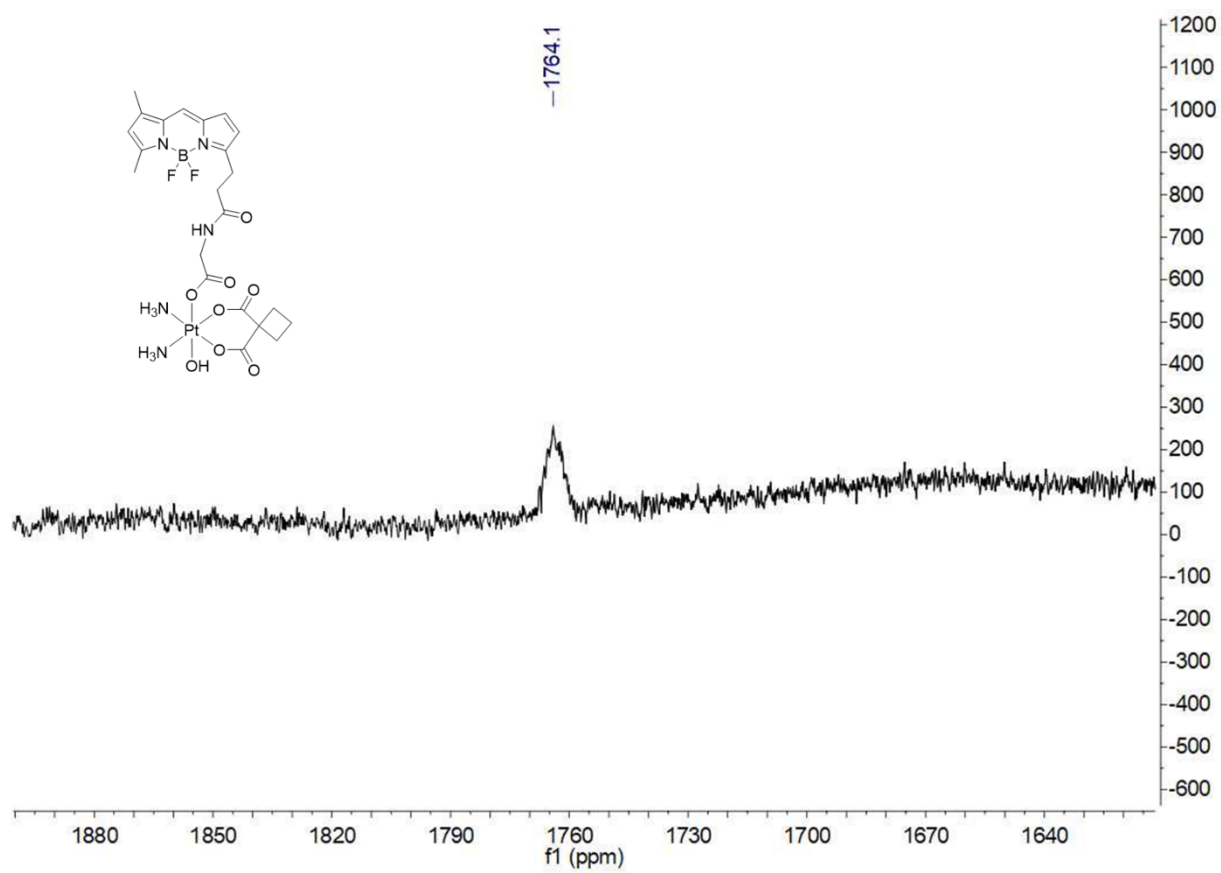

**Figure S24.**  $^{195}\text{Pt}$ -NMR spectrum of complex **OH3C** in  $\text{DMSO}-d_6$ .



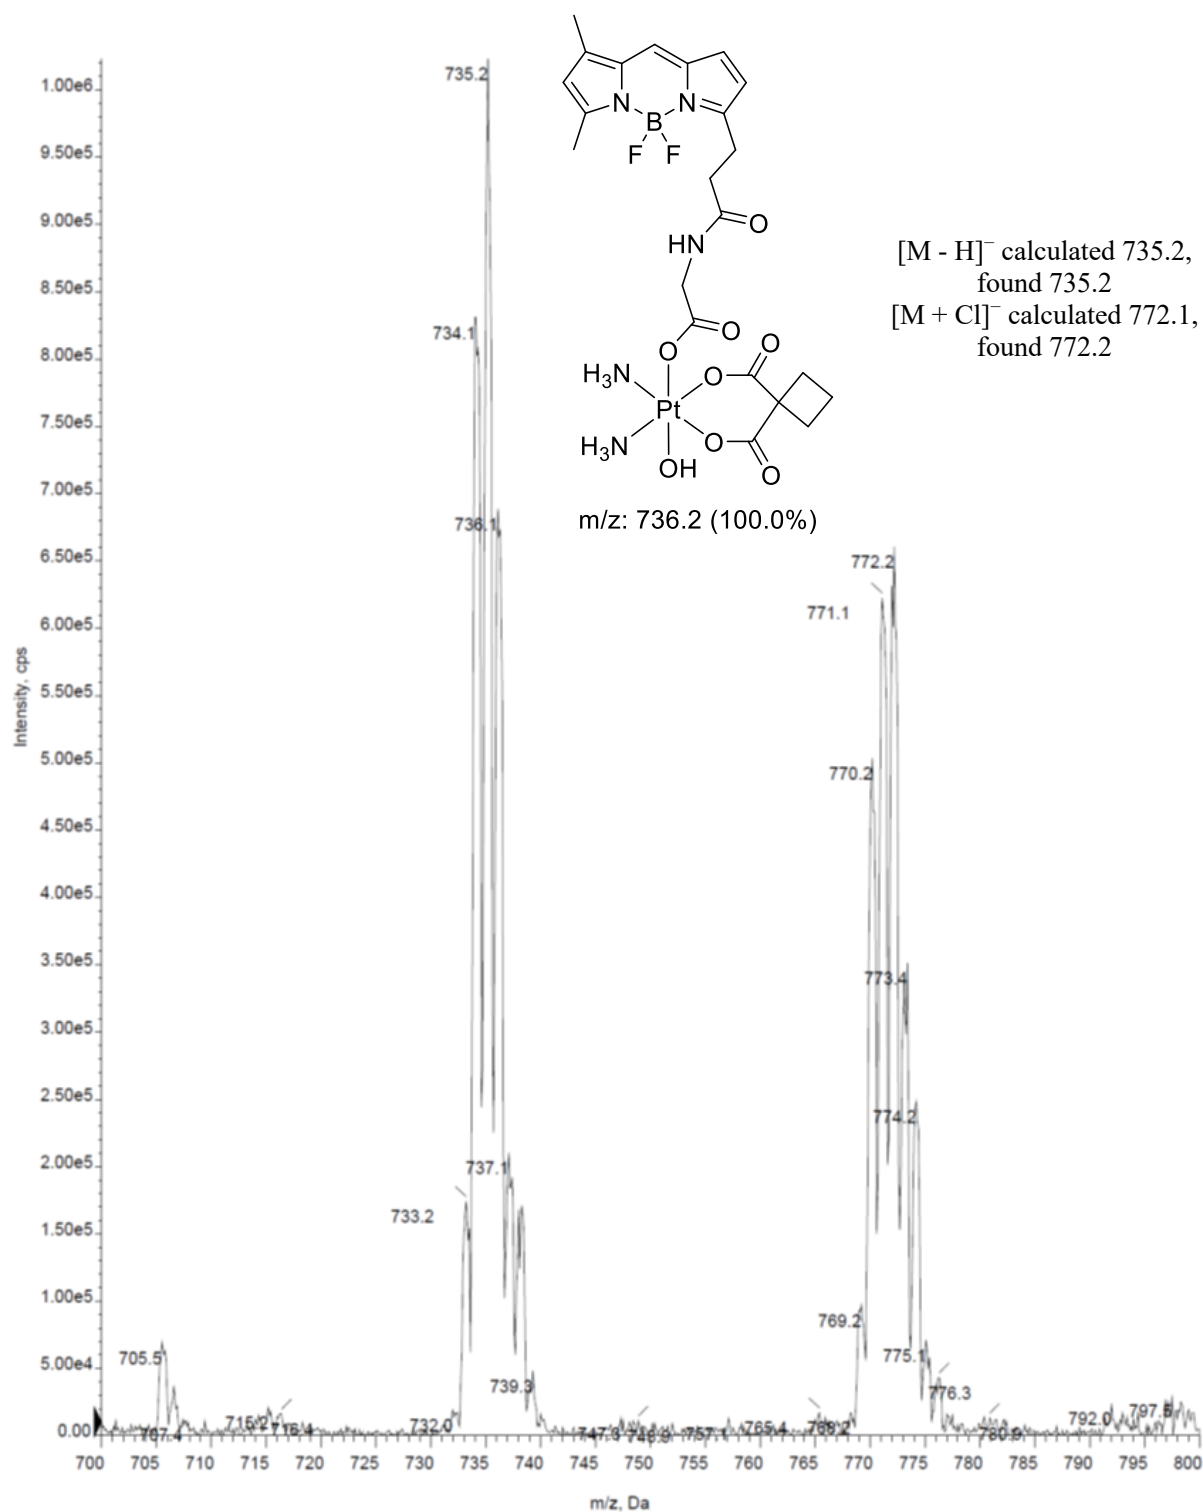

**Figure S25.** ESI-MS spectrum of complex **OH3C**, negative mode in methanol.

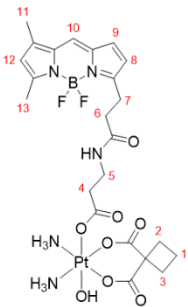

30

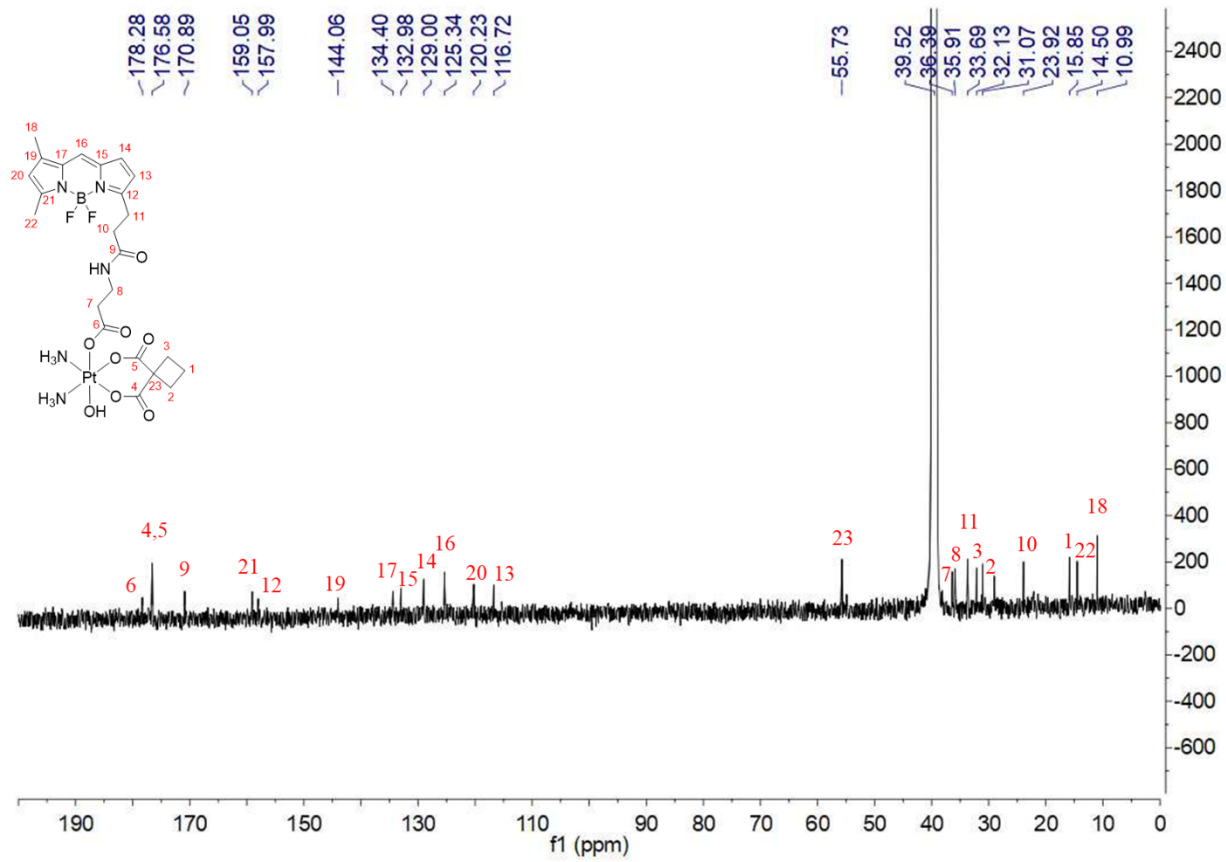

**Figure S27.**  $^{13}\text{C}$ -NMR spectrum of complex **OH4C** in  $\text{DMSO}-d_6$ .

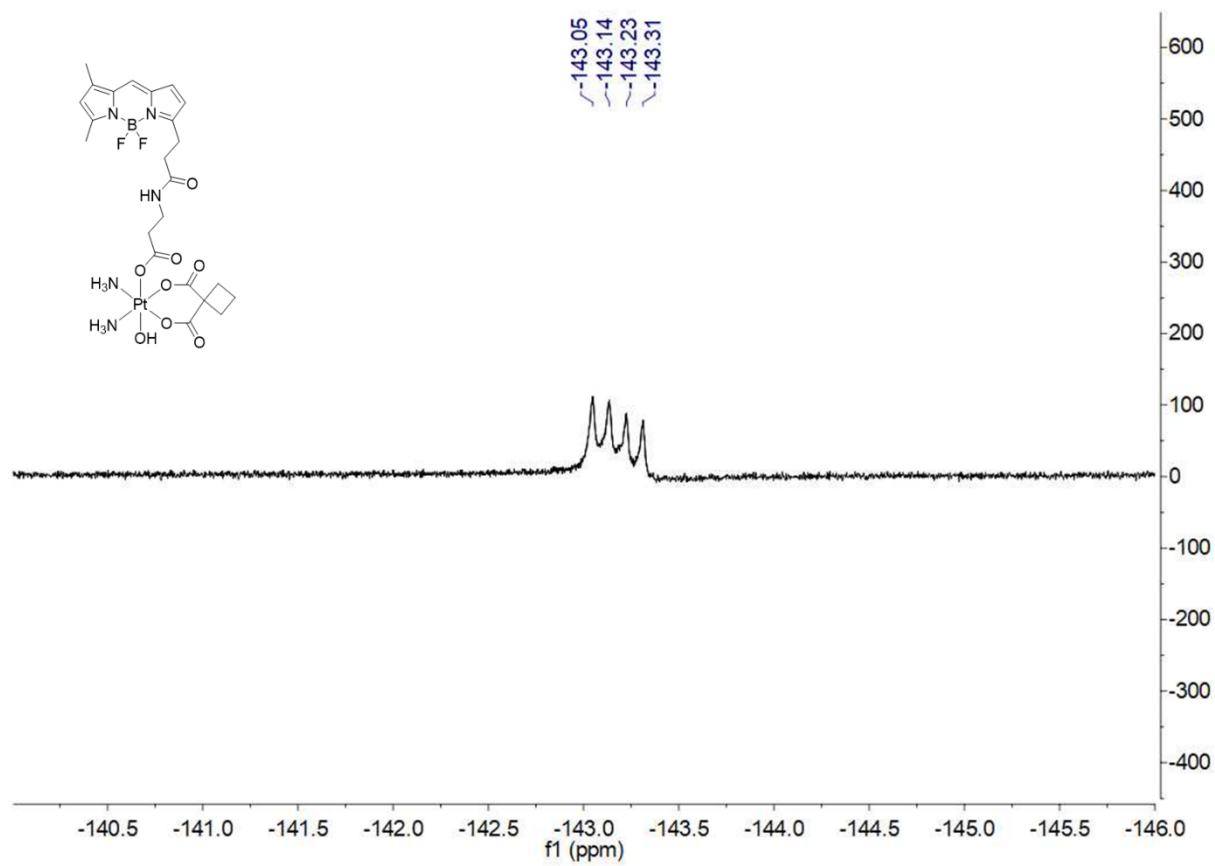

**Figure S28.**  $^{19}\text{F}$ -NMR spectrum of complex **OH4C** in  $\text{DMSO}-d_6$ .

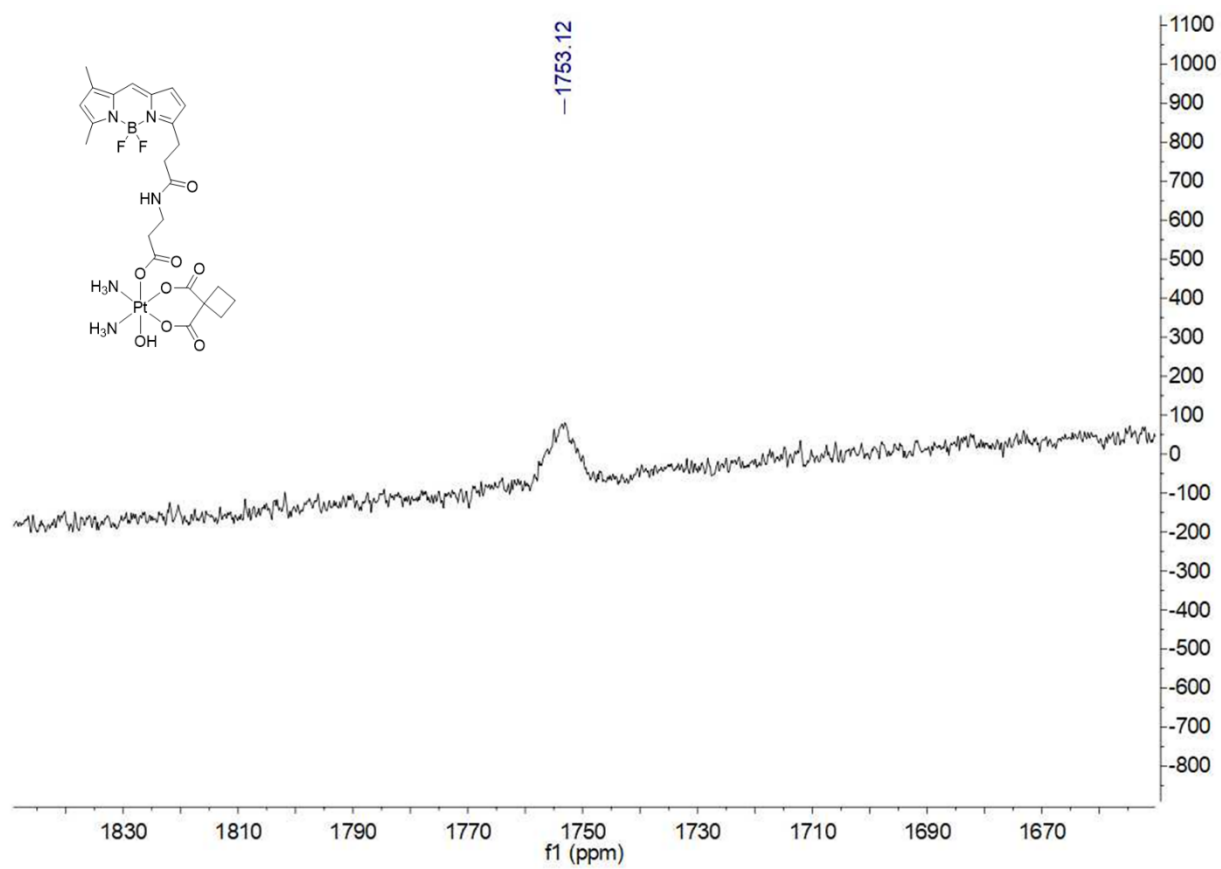

**Figure S29.**  $^{195}\text{Pt}$ -NMR spectrum of complex **OH4C** in  $\text{DMSO-}d_6$ .

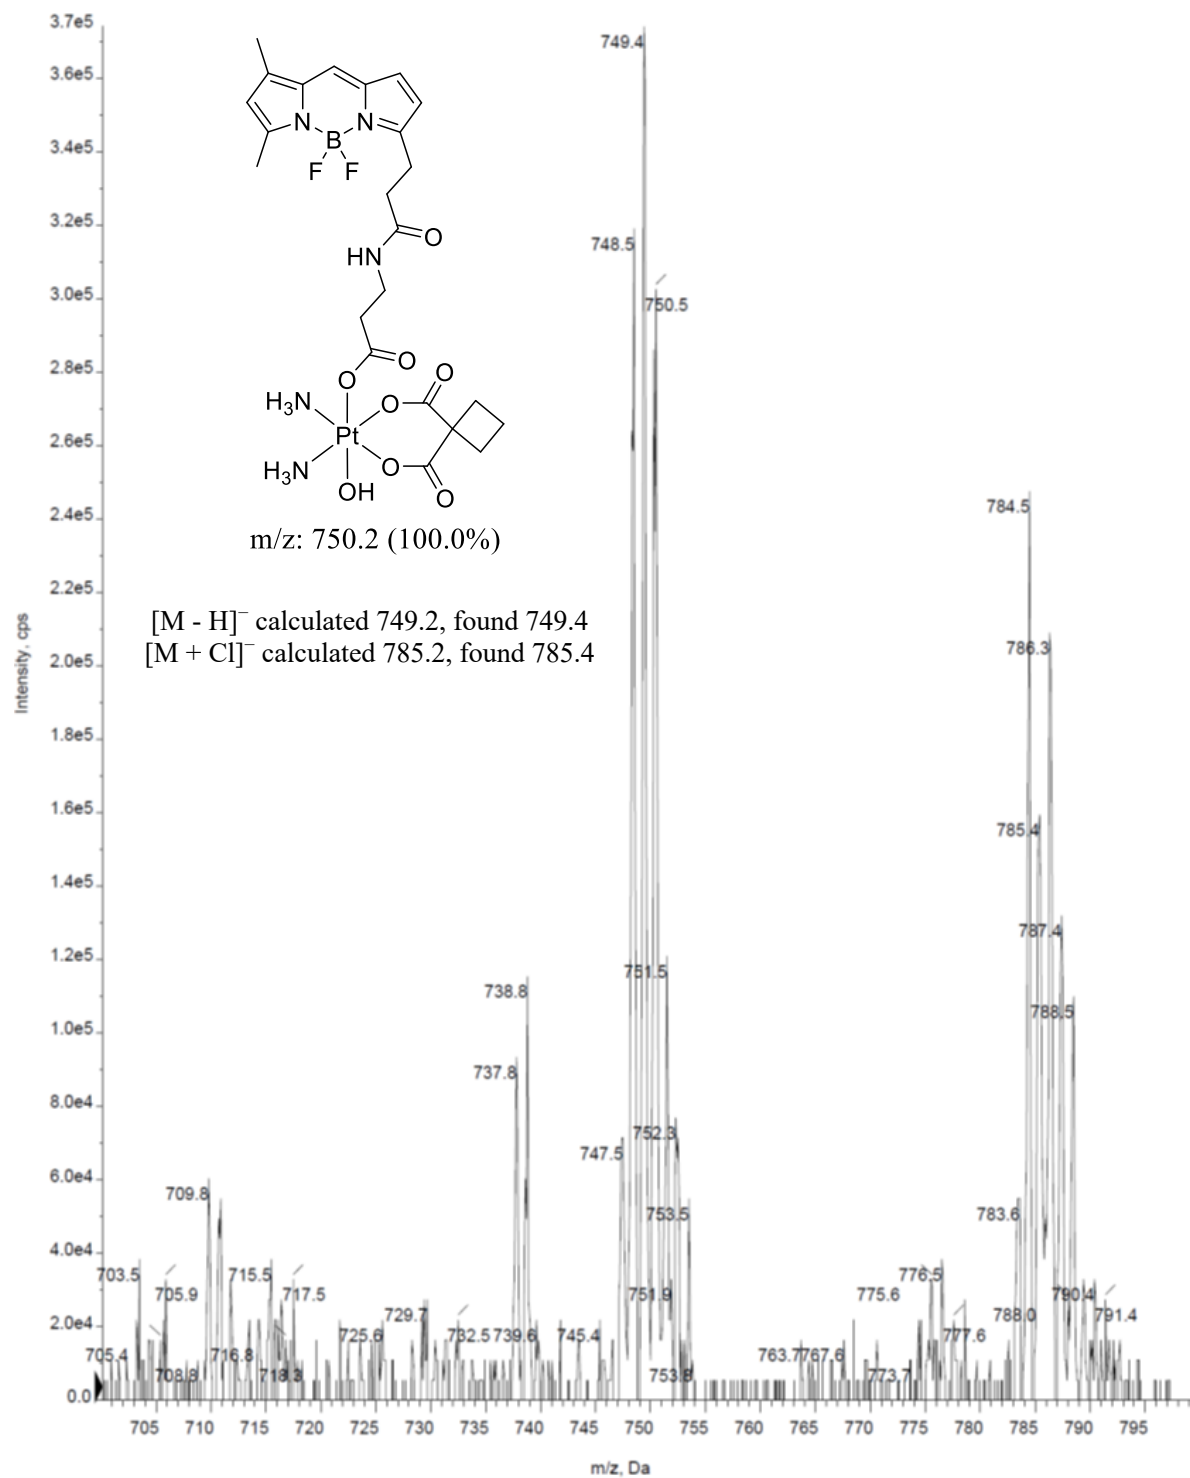

**Figure S30.** ESI-MS spectrum of complex **OH4C**, negative mode in methanol.

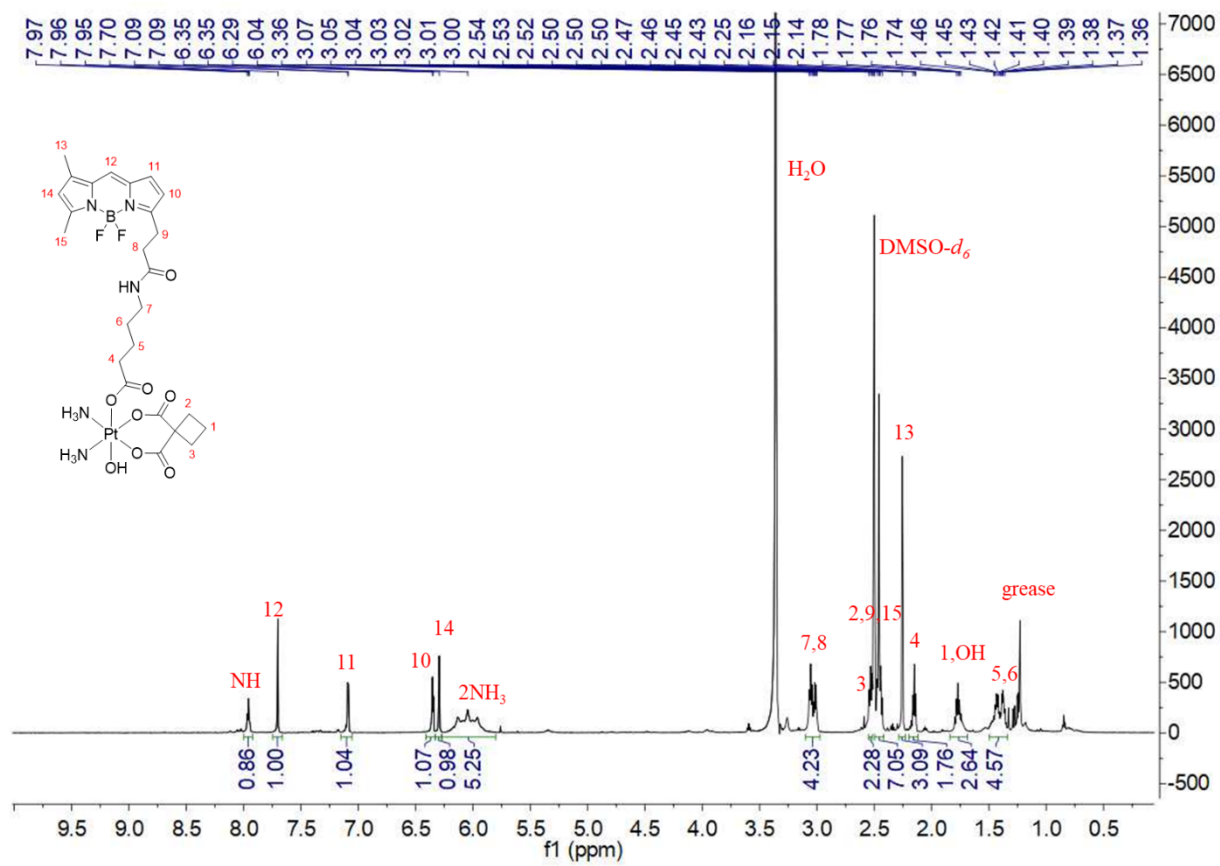

**Figure S31.** <sup>1</sup>H-NMR spectrum of complex **OH6C** in DMSO-*d*<sub>6</sub>.

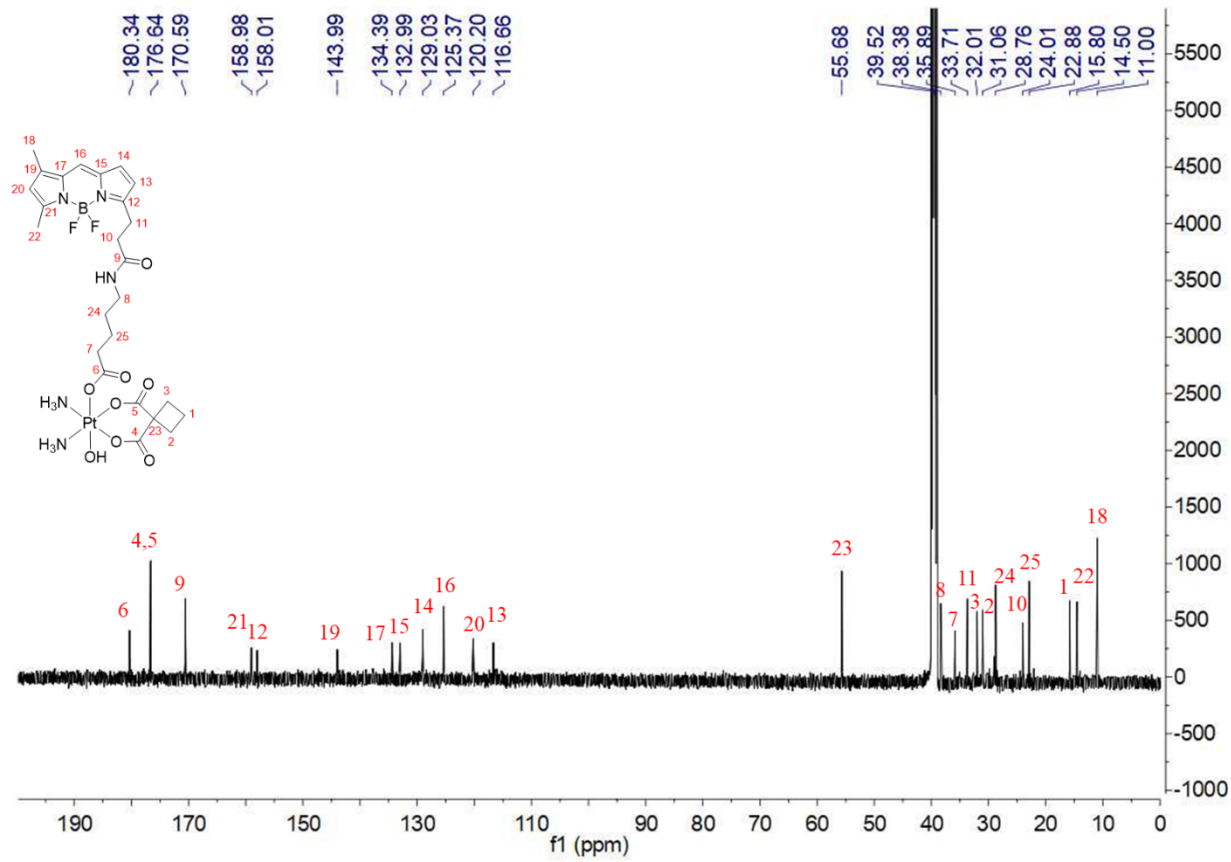

**Figure S32.**  $^{13}\text{C}$ -NMR spectrum of complex **OH6C** in  $\text{DMSO}-d_6$ .



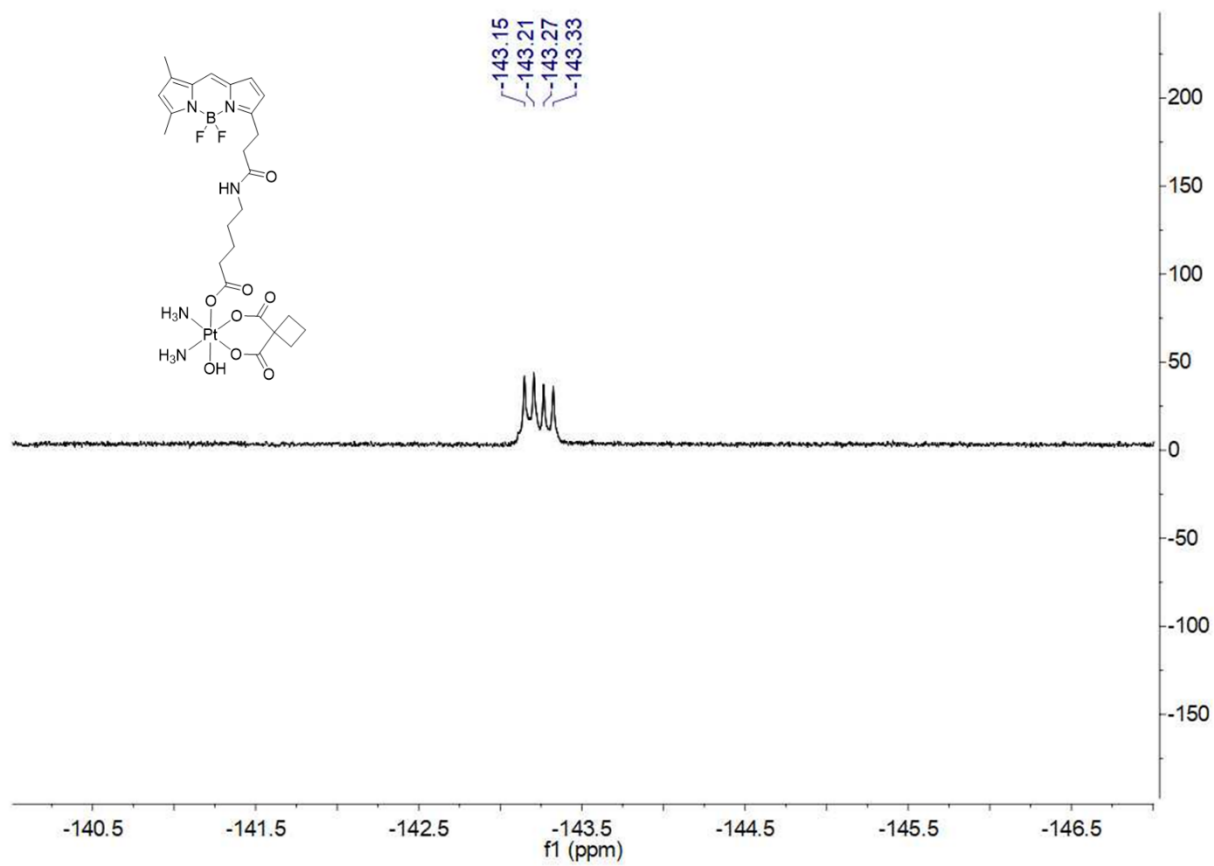

**Figure S33.**  $^{19}\text{F}$ -NMR spectrum of complex **OH6C** in  $\text{DMSO}-d_6$ .

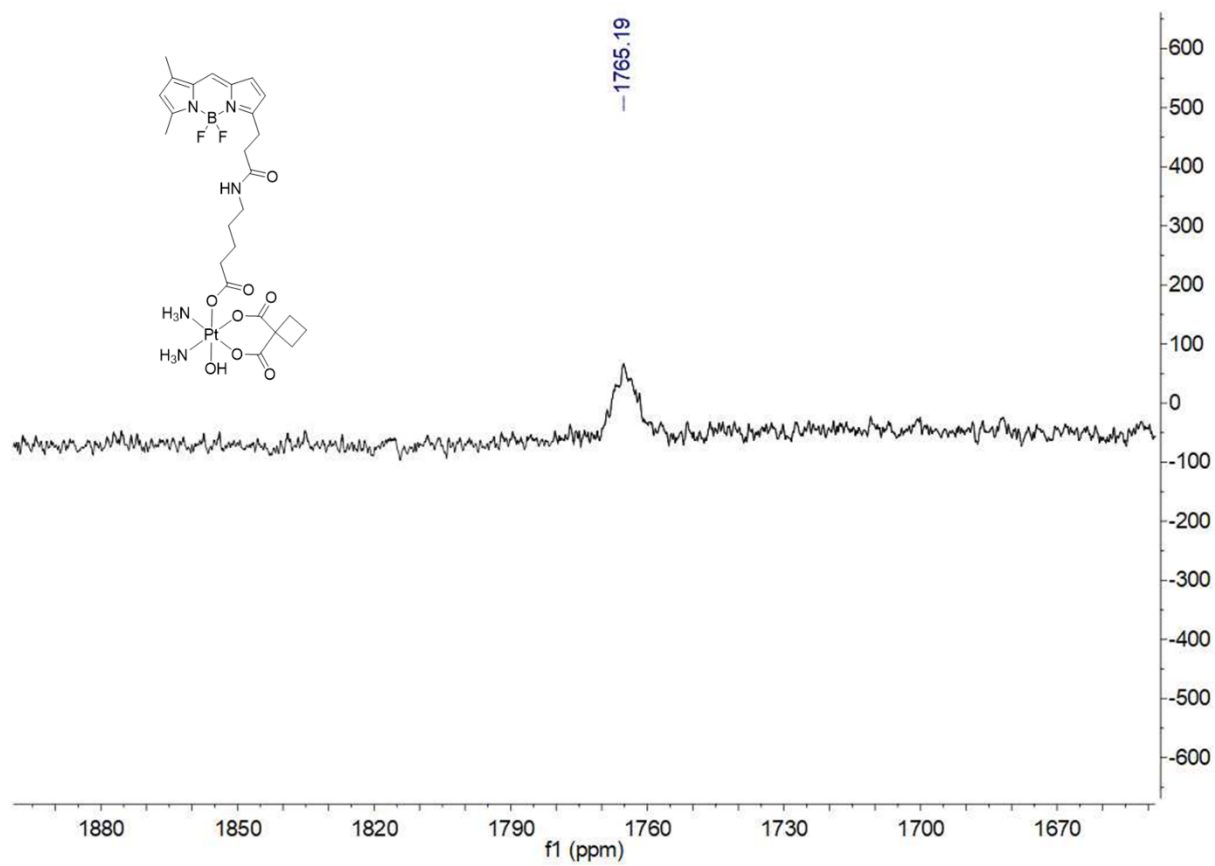

**Figure S34.**  $^{195}\text{Pt}$ -NMR spectrum of complex **OH6C** in  $\text{DMSO}-d_6$ .

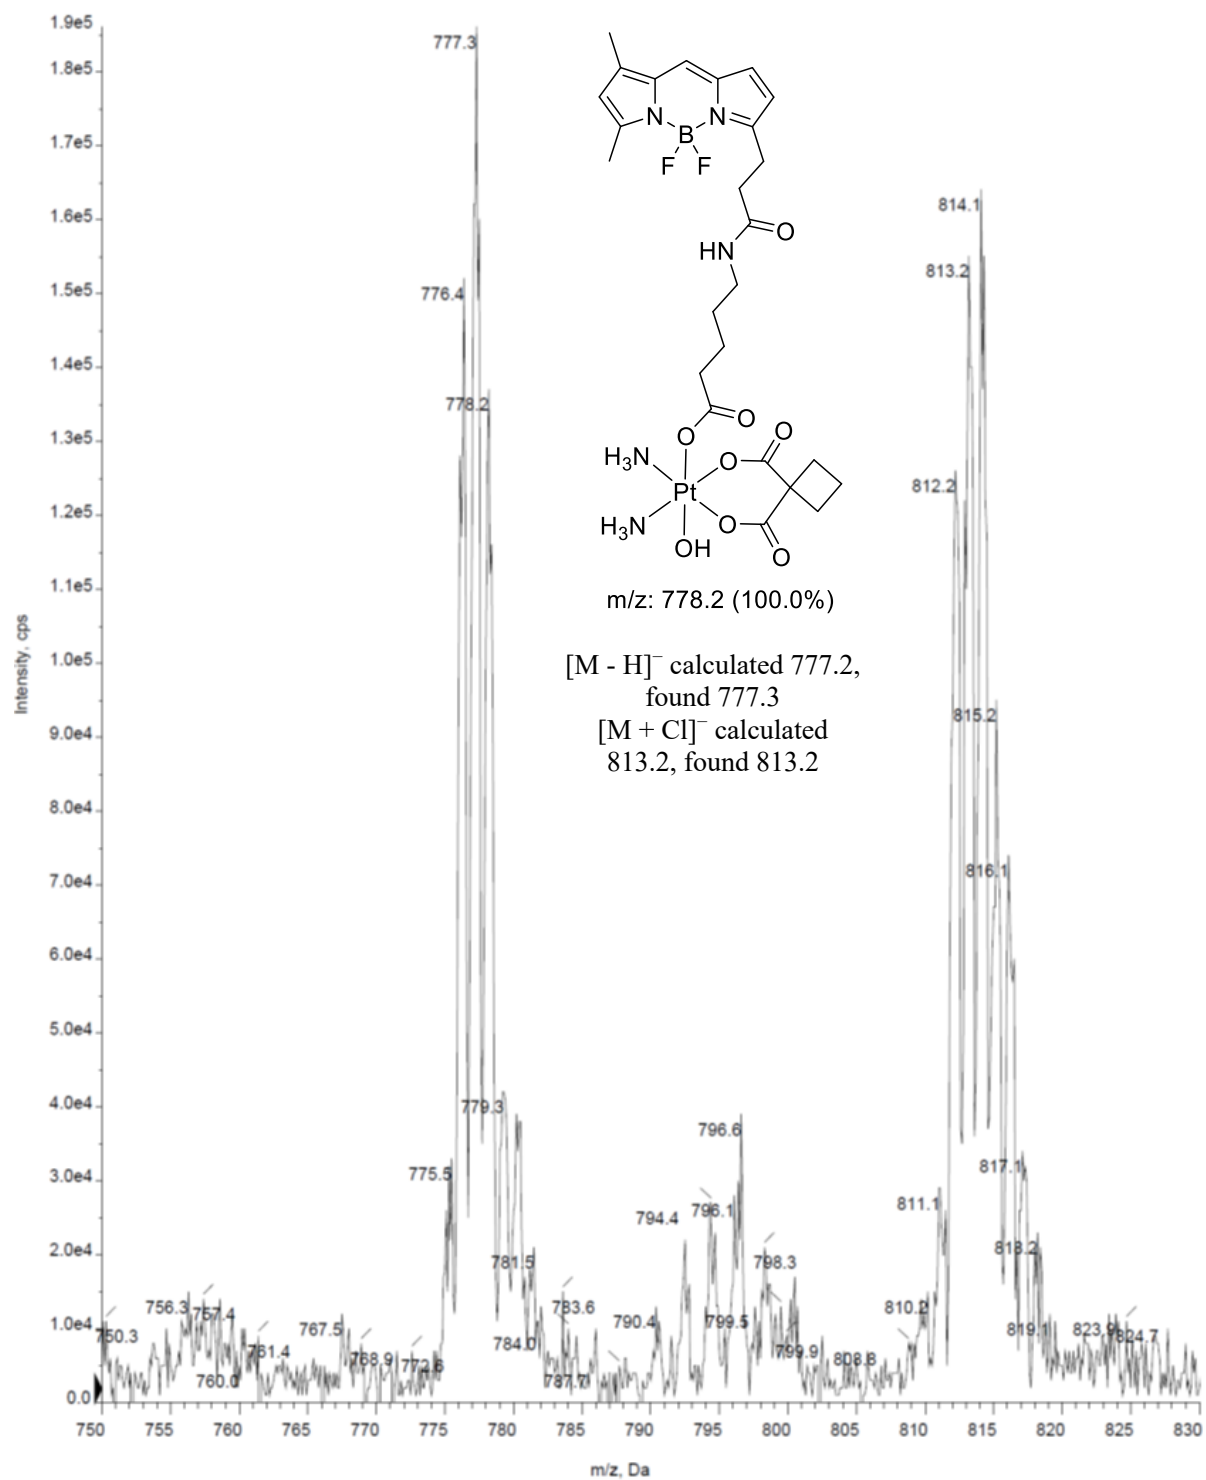

**Figure S35.** ESI-MS spectrum of complex **OH6C**, negative mode in methanol.

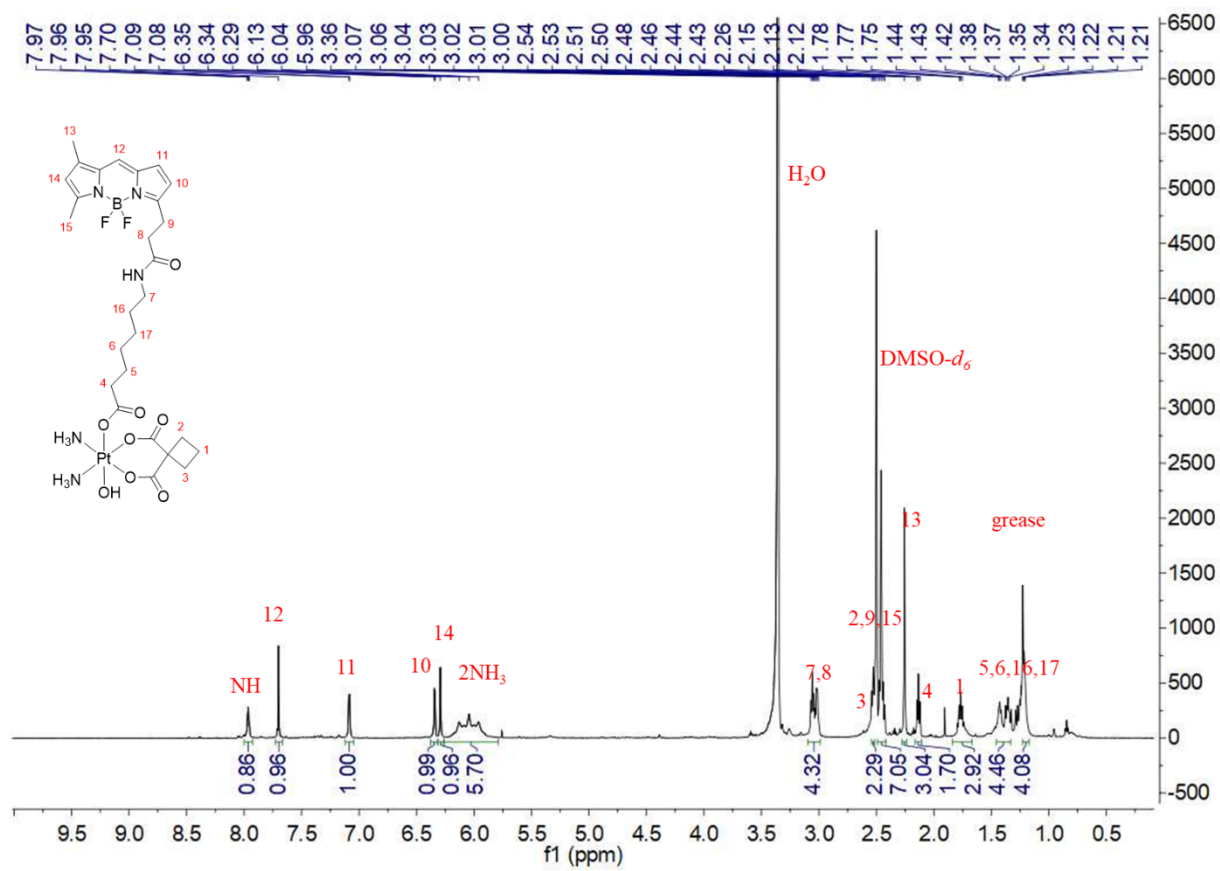

**Figure S36.** <sup>1</sup>H-NMR spectrum of complex **OH8C** in DMSO-*d*<sub>6</sub>.

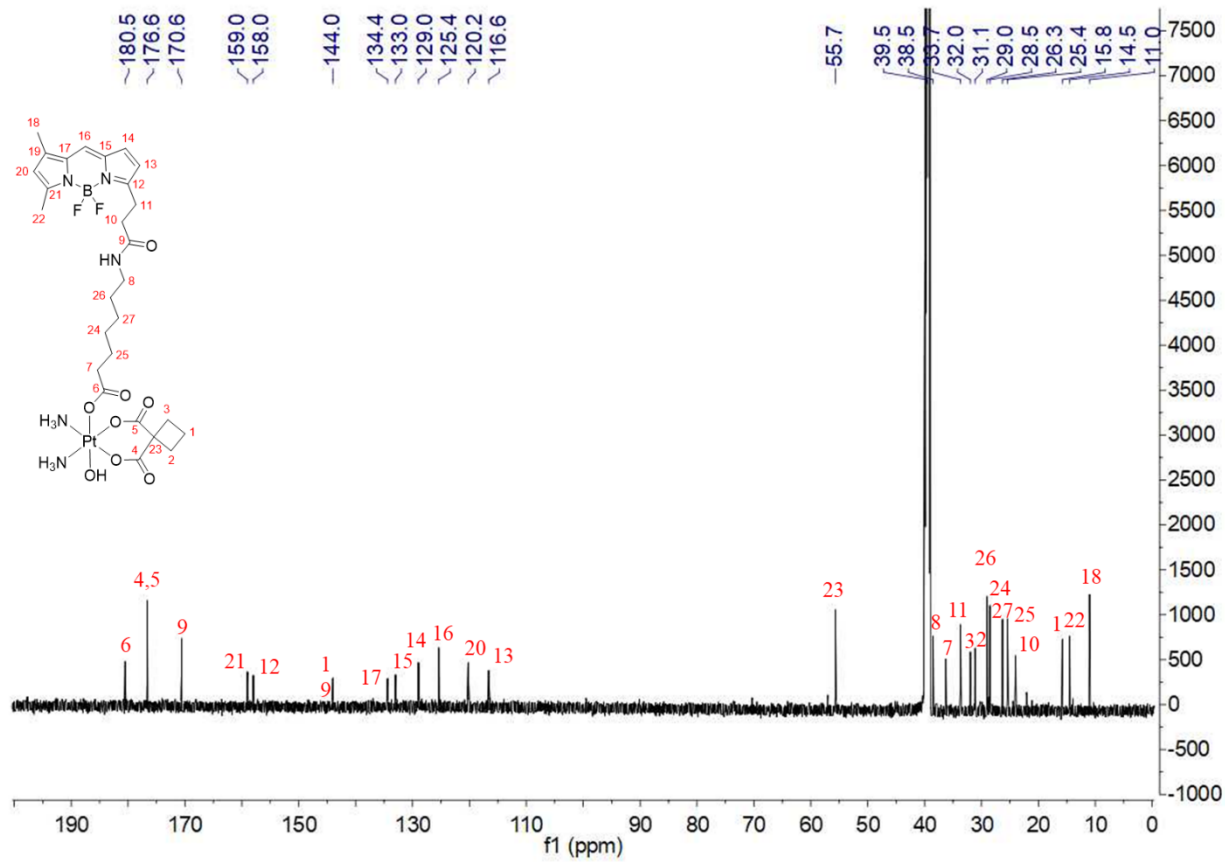

**Figure S37.**  $^{13}\text{C}$ -NMR spectrum of complex **OH8C** in  $\text{DMSO}-d_6$ .

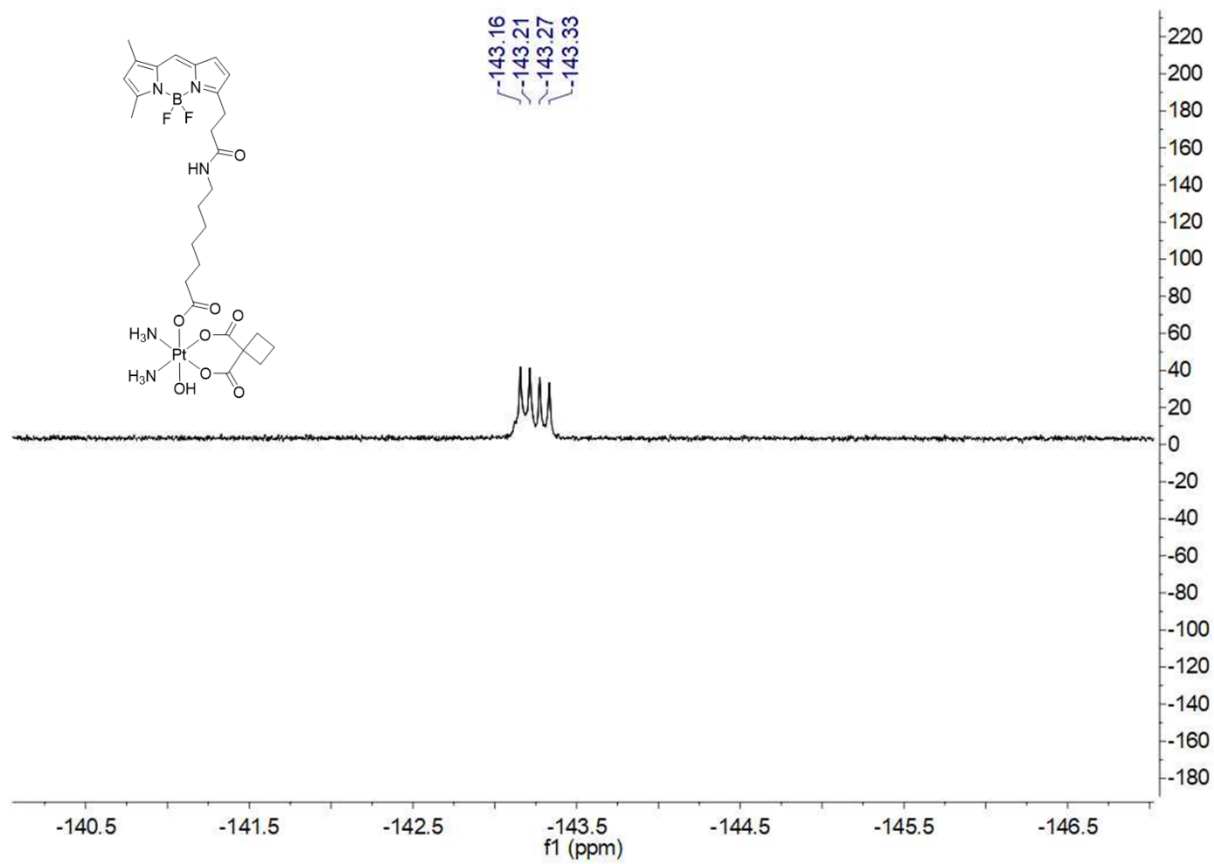

**Figure S38.**  $^{19}\text{F}$ -NMR spectrum of complex **OH8C** in  $\text{DMSO-}d_6$ .

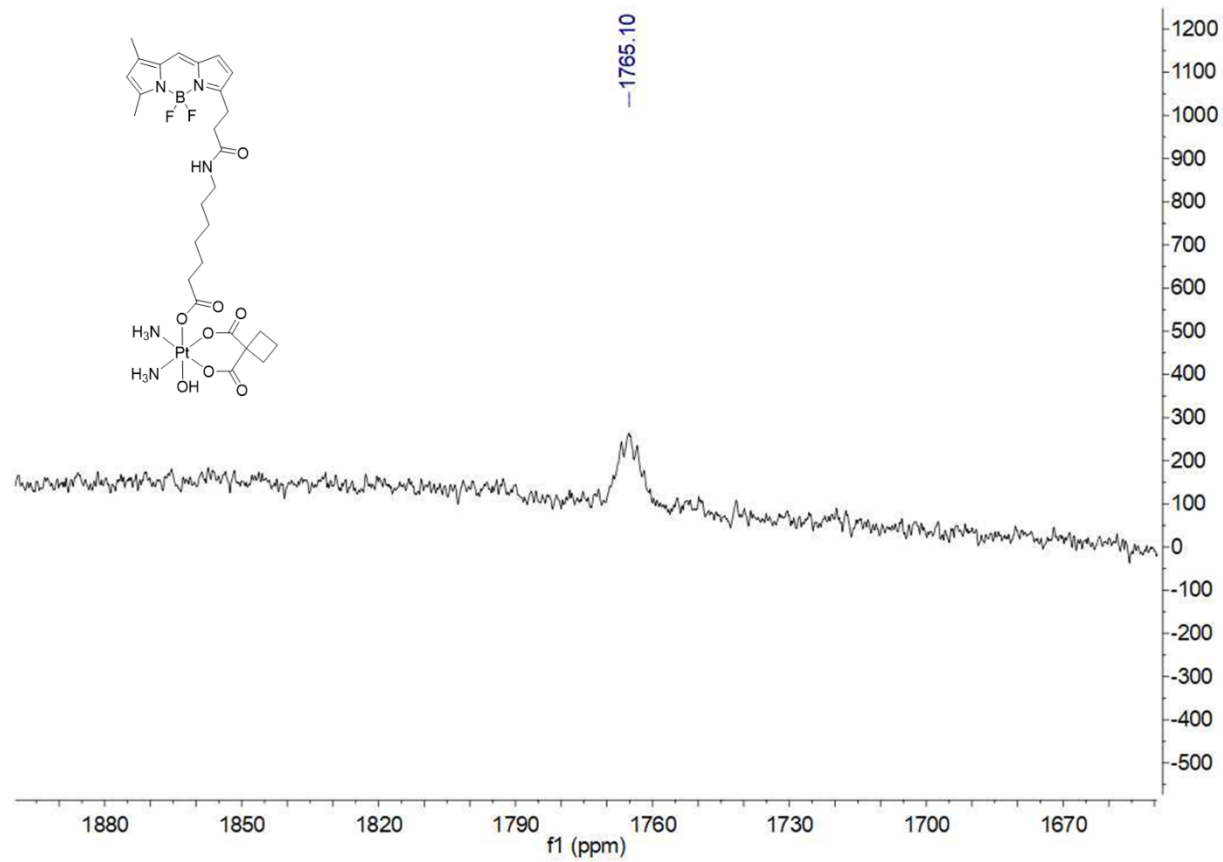

**Figure S39.**  $^{195}\text{Pt}$ -NMR spectrum of complex **OH8C** in  $\text{DMSO}-d_6$ .

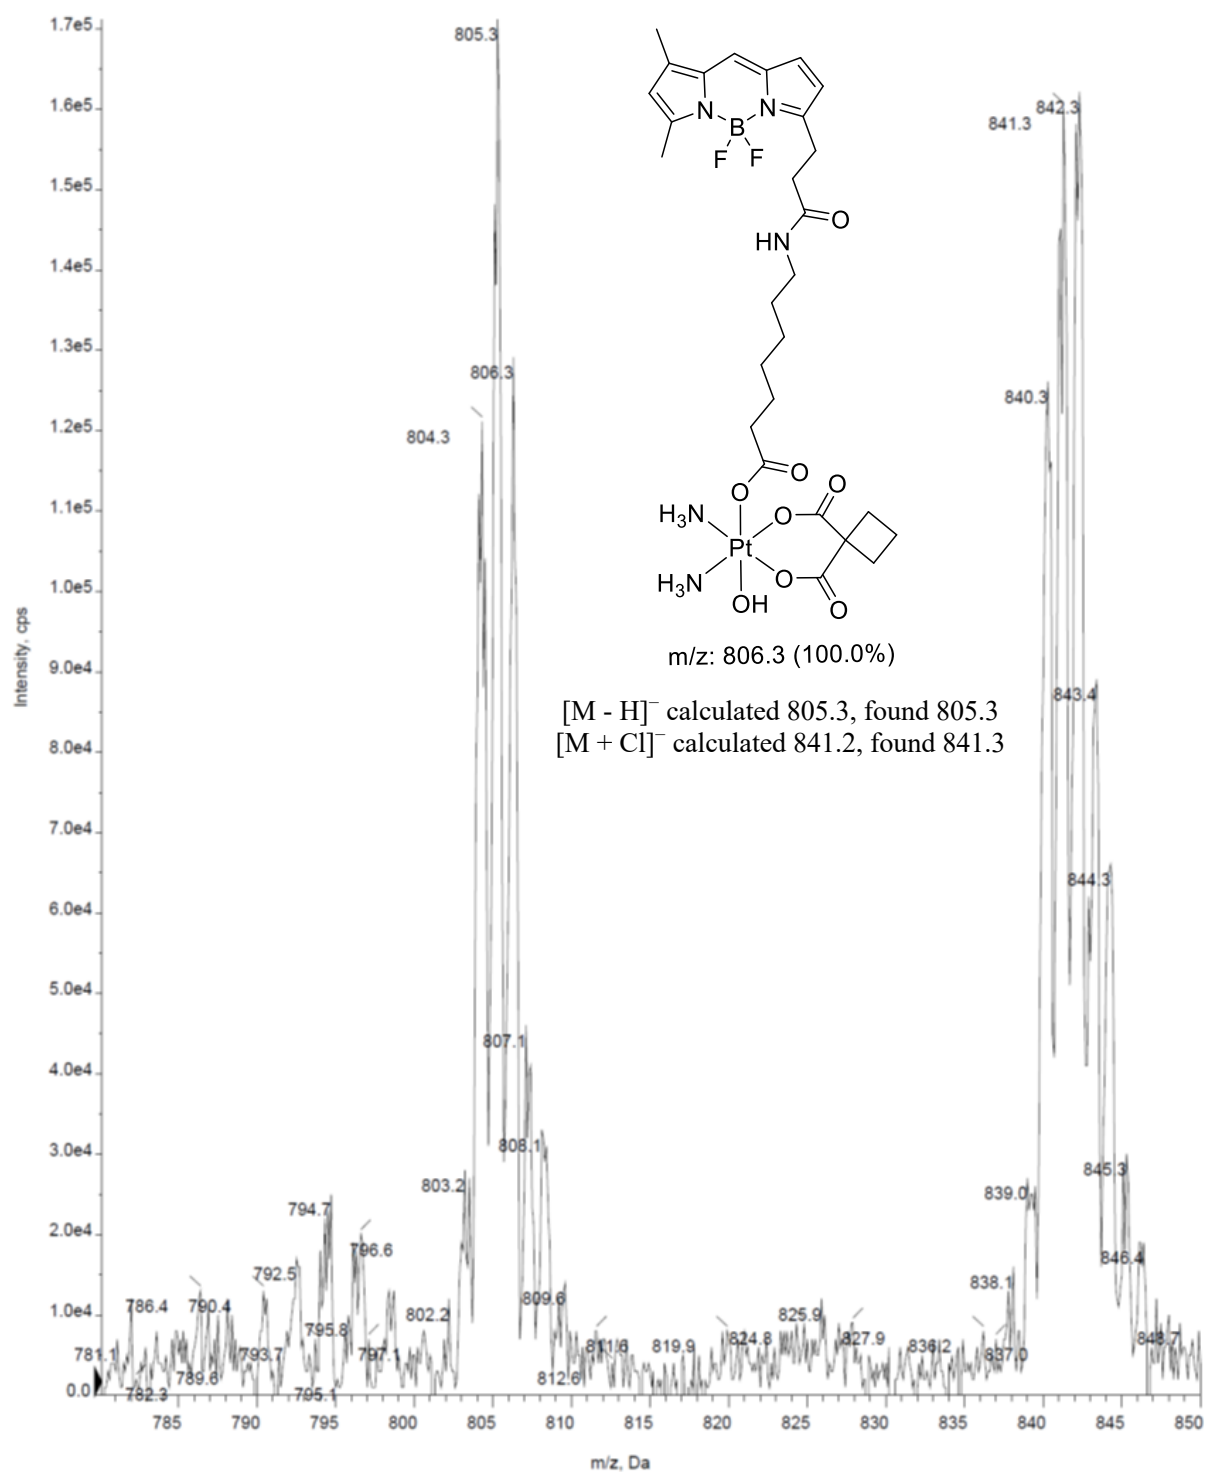

**Figure S40.** ESI-MS spectrum of complex **OH8C**, negative mode in methanol.



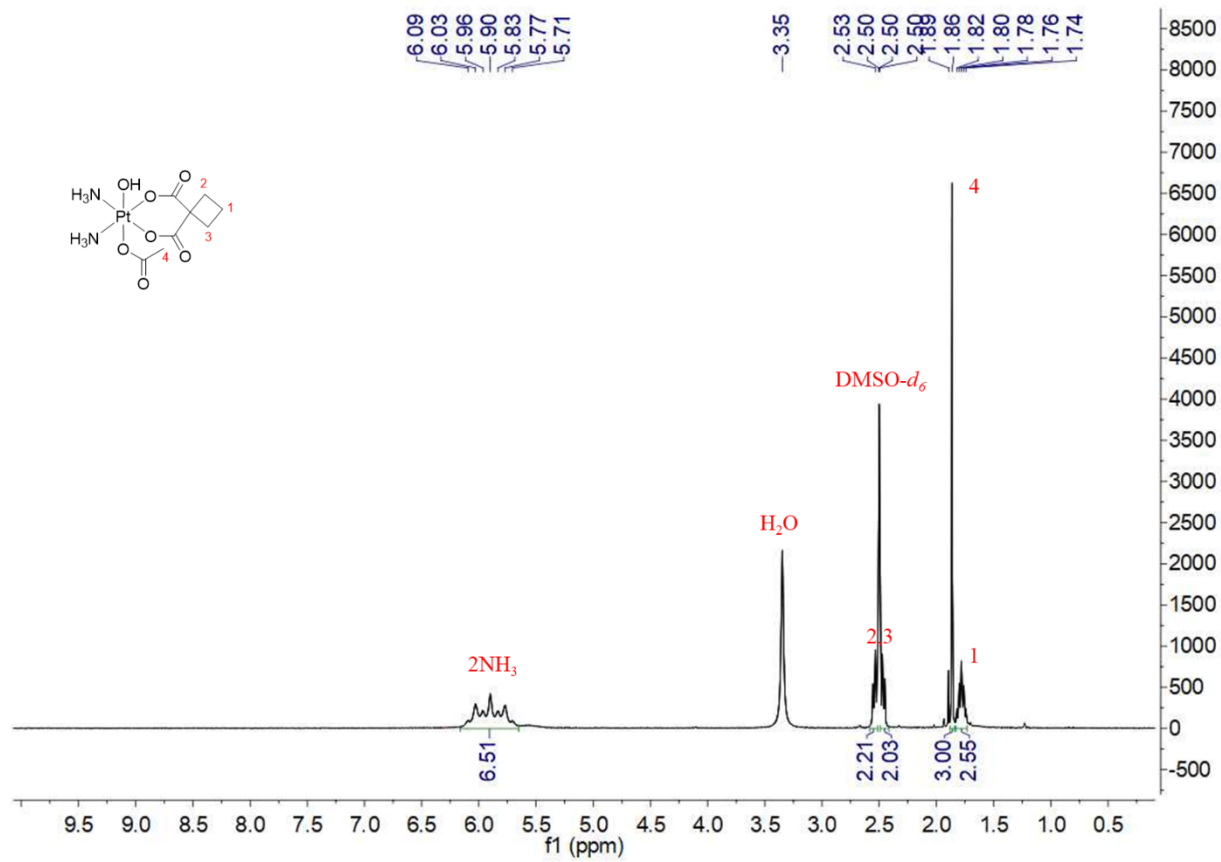

**Figure S41.** <sup>1</sup>H-NMR spectrum of compound **15** in DMSO-*d*<sub>6</sub>.

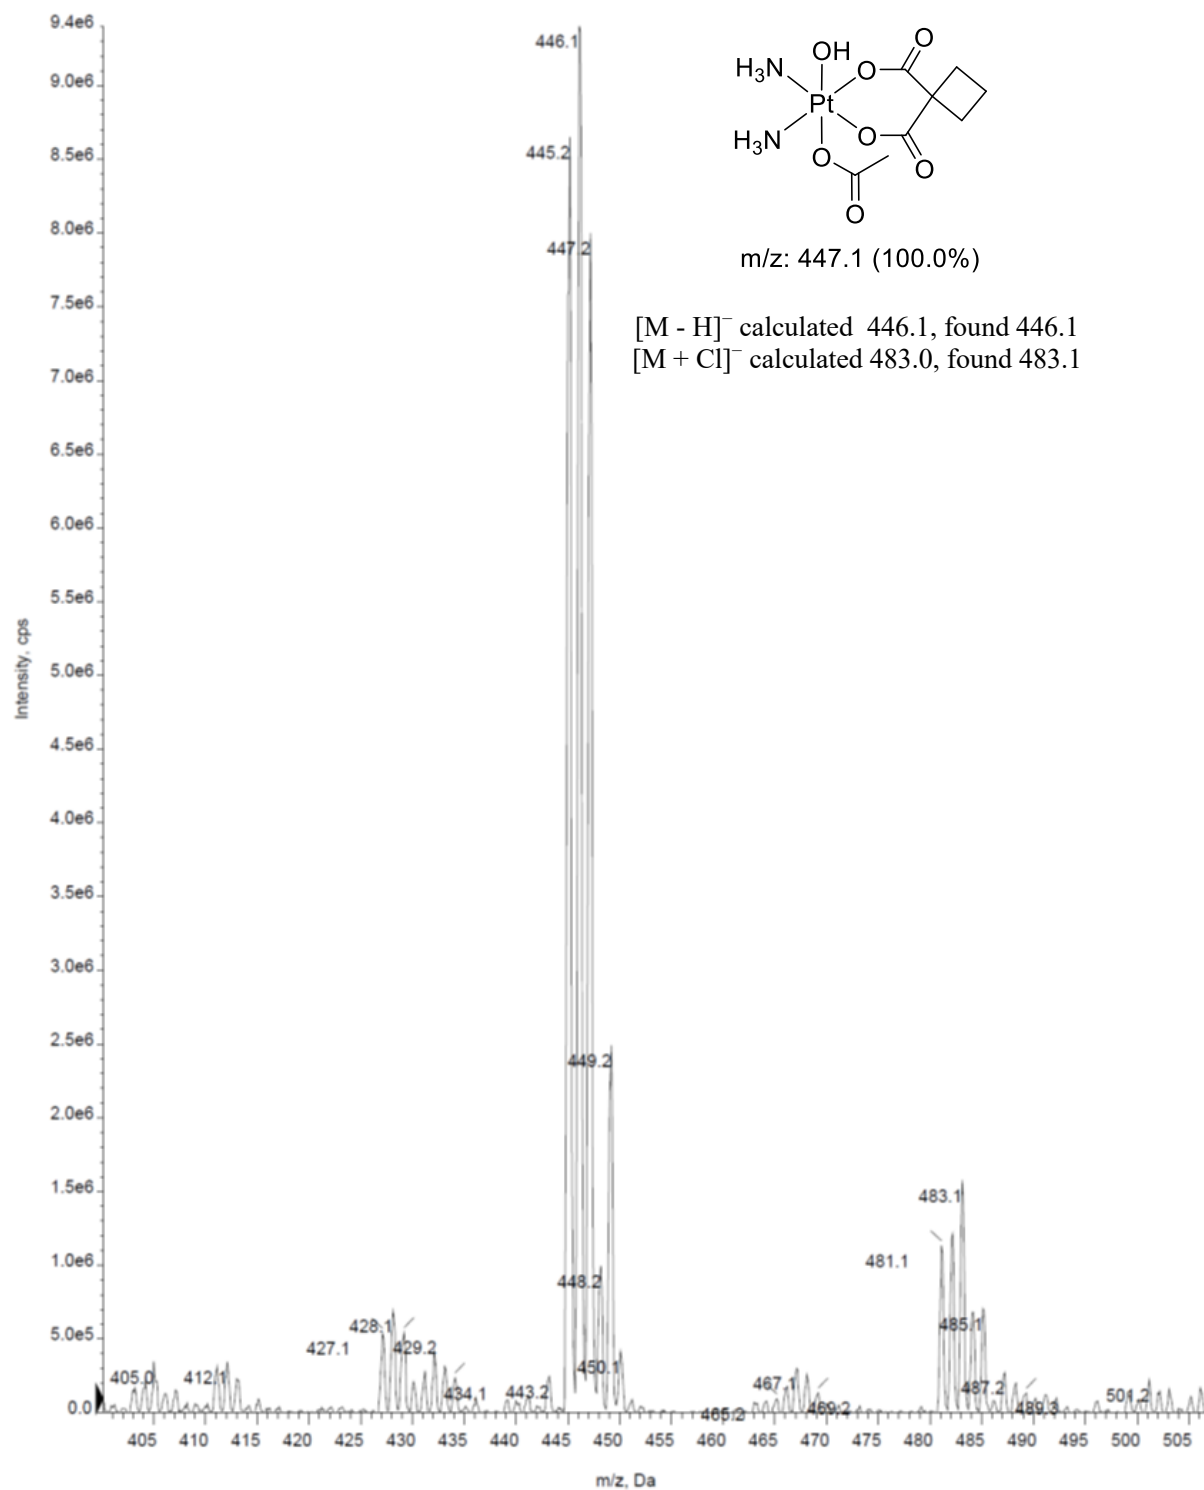

**Figure S42.** ESI-MS spectrum of compound **15**, negative mode in methanol.

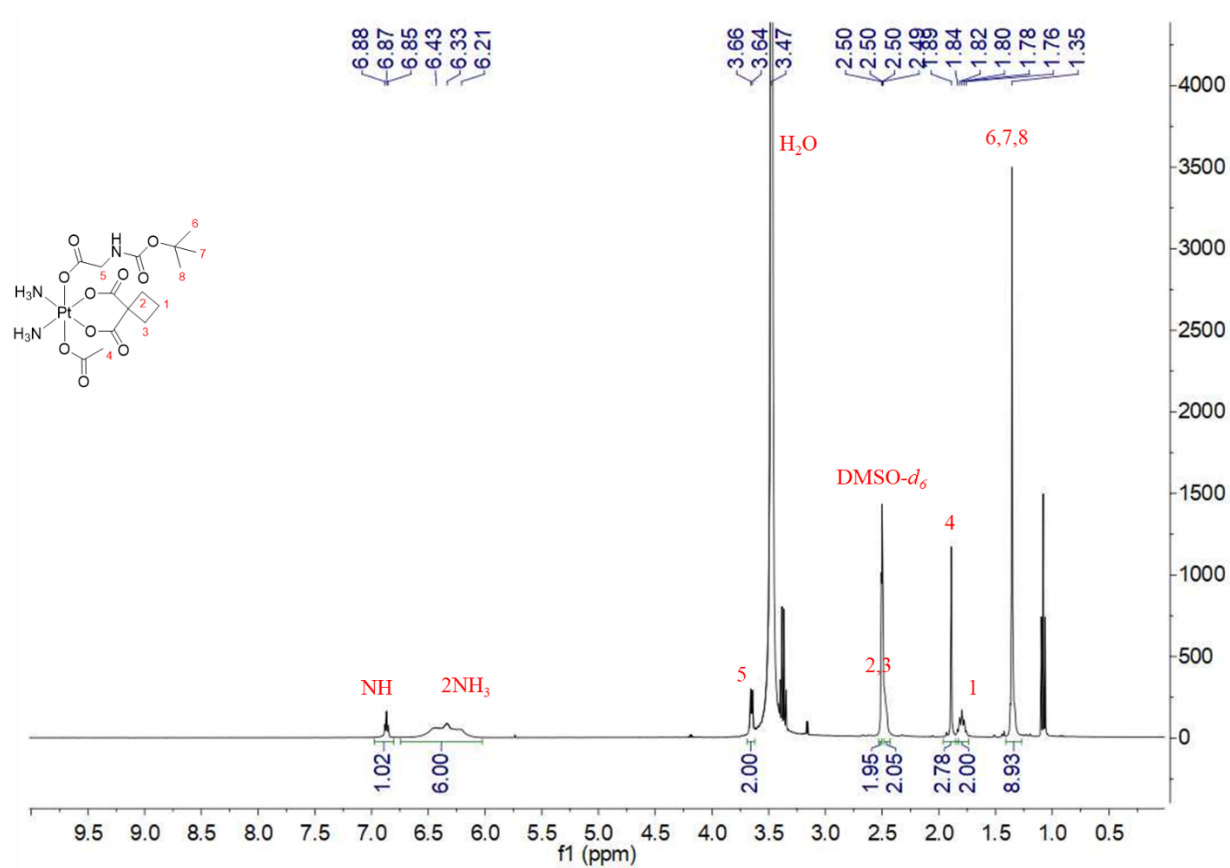

**Figure S43.** <sup>1</sup>H-NMR spectrum of compound **20** in DMSO-*d*<sub>6</sub>.

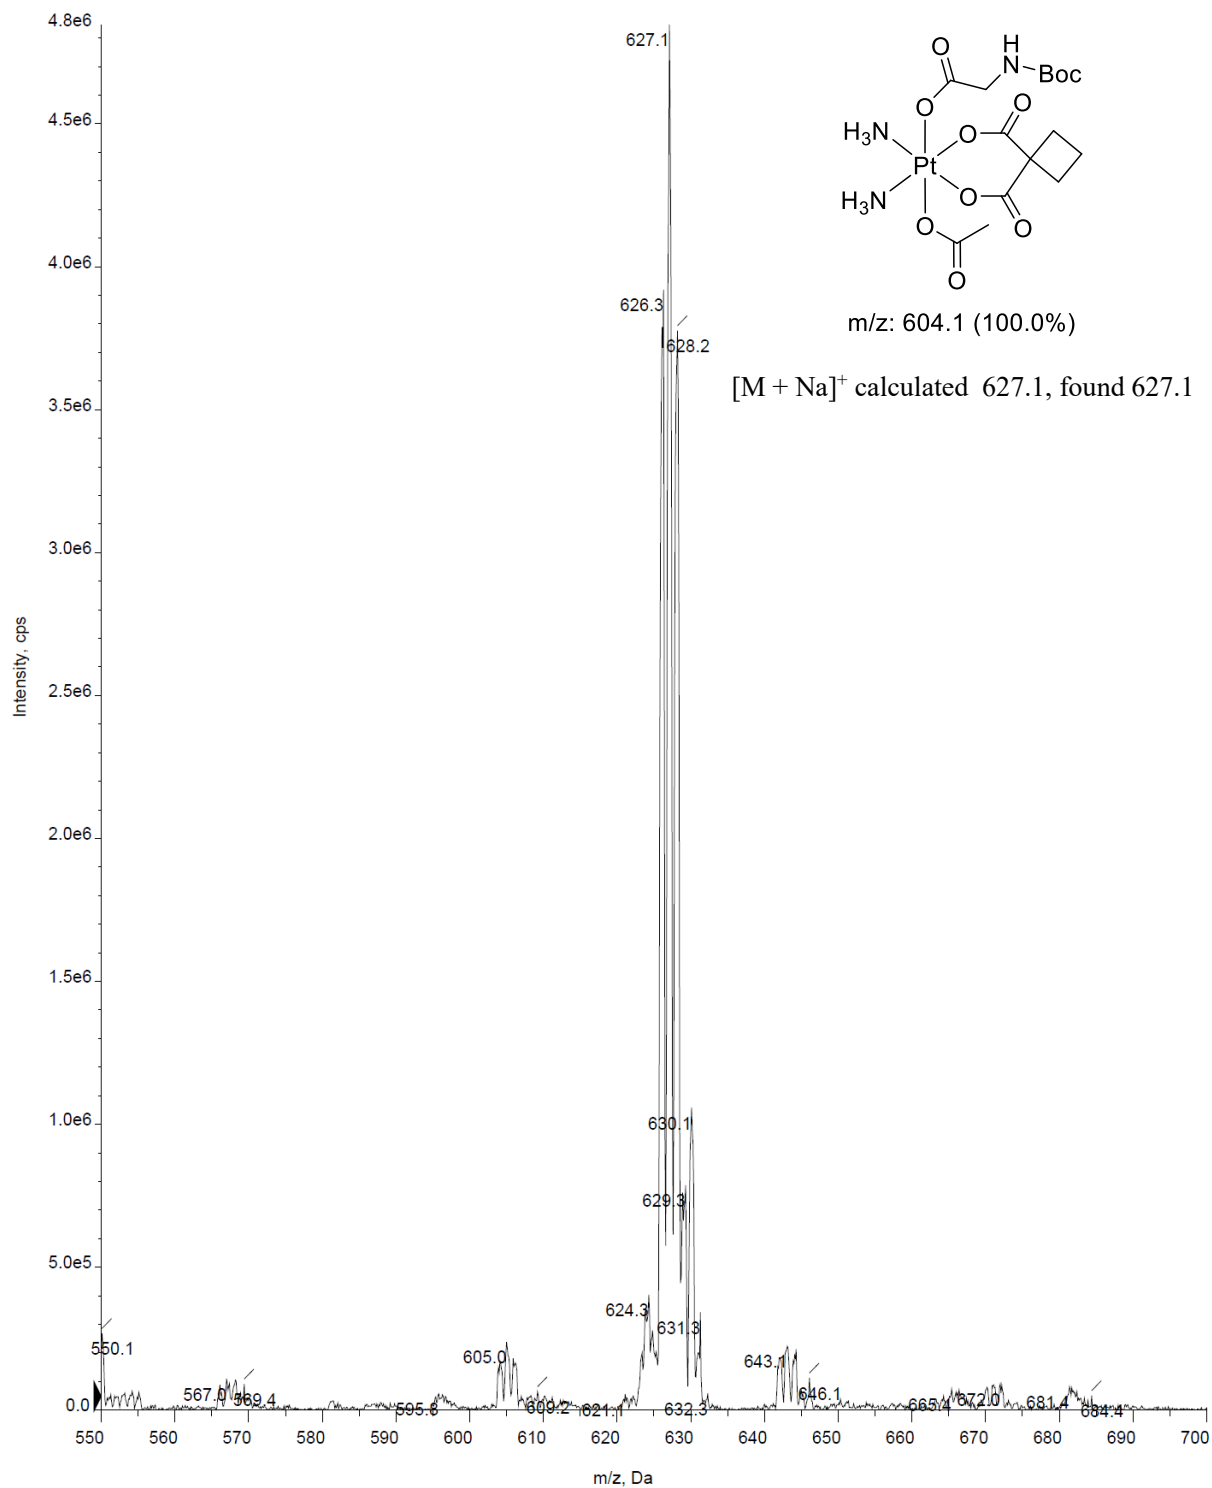

**Figure S44.** ESI-MS spectrum of compound **20**, positive mode in methanol.

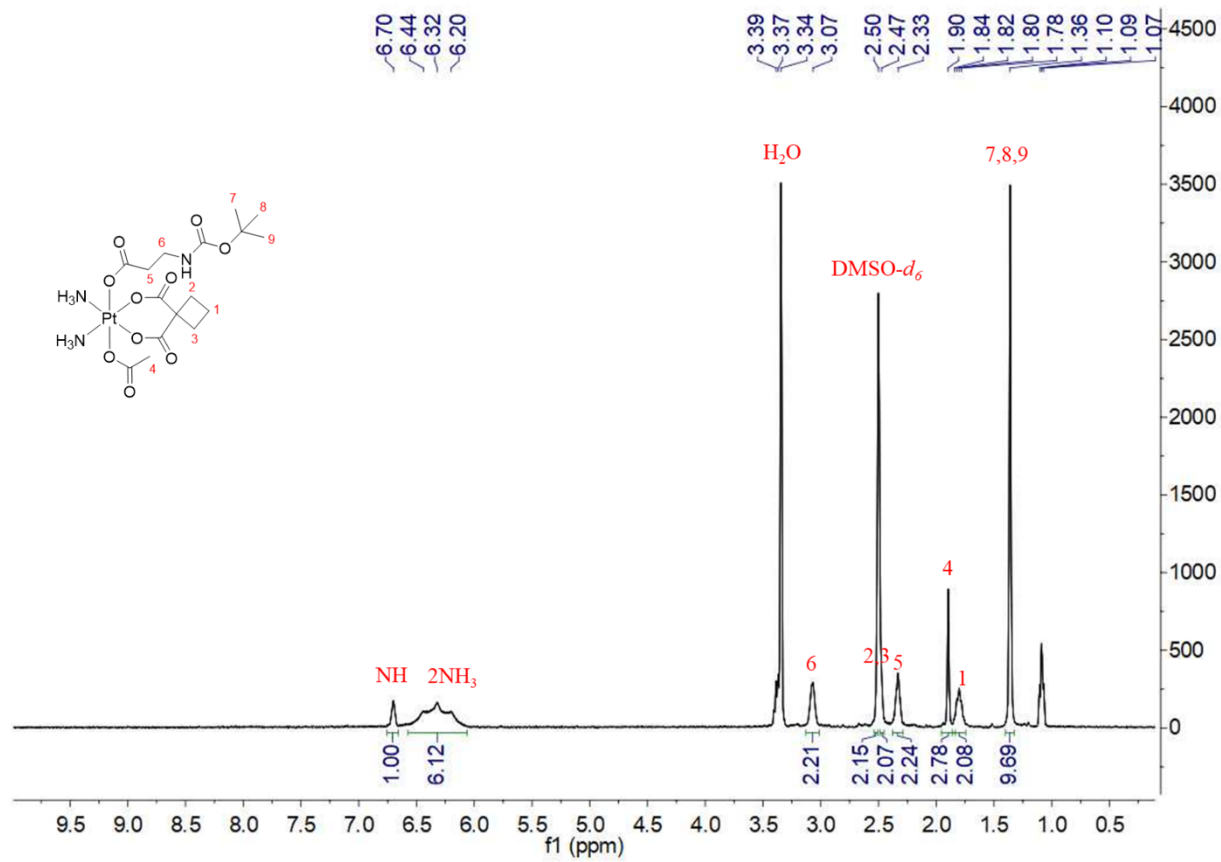

**Figure S45.**  $^1\text{H}$ -NMR spectrum of compound **21** in DMSO- $d_6$ .

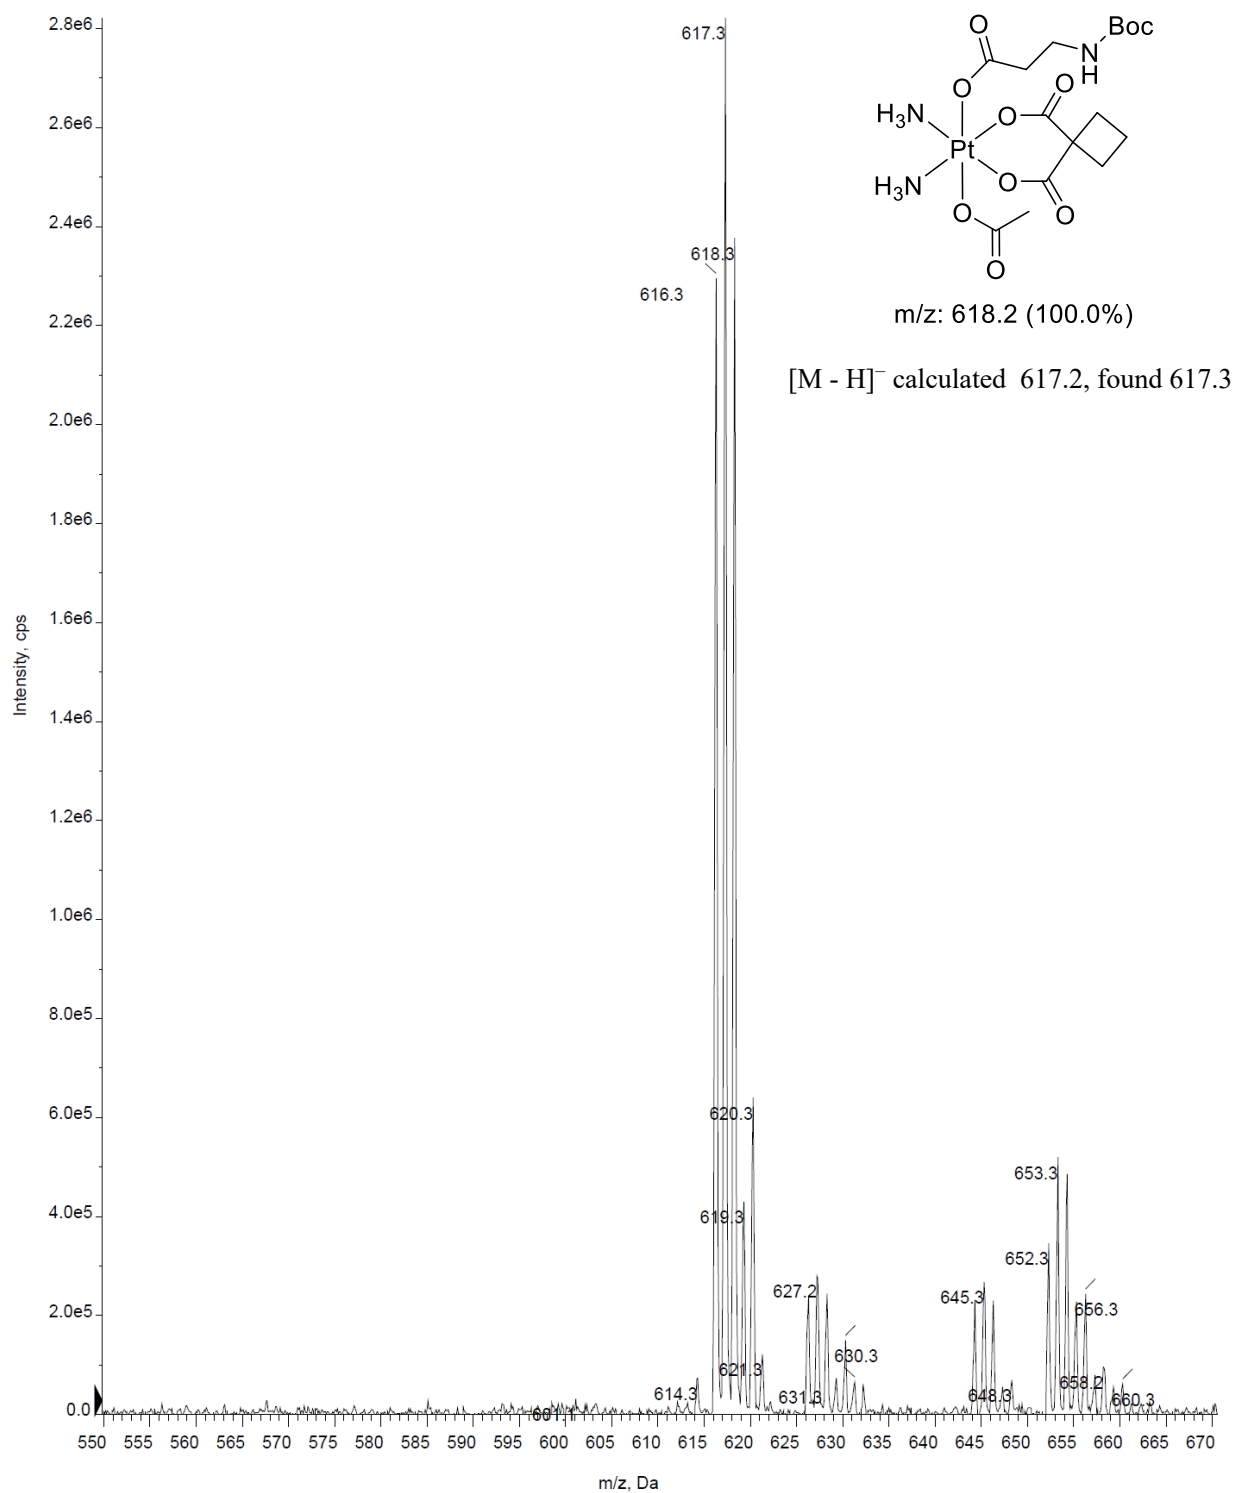

**Figure S46.** ESI-MS spectrum of compound **21**, negative mode in methanol.

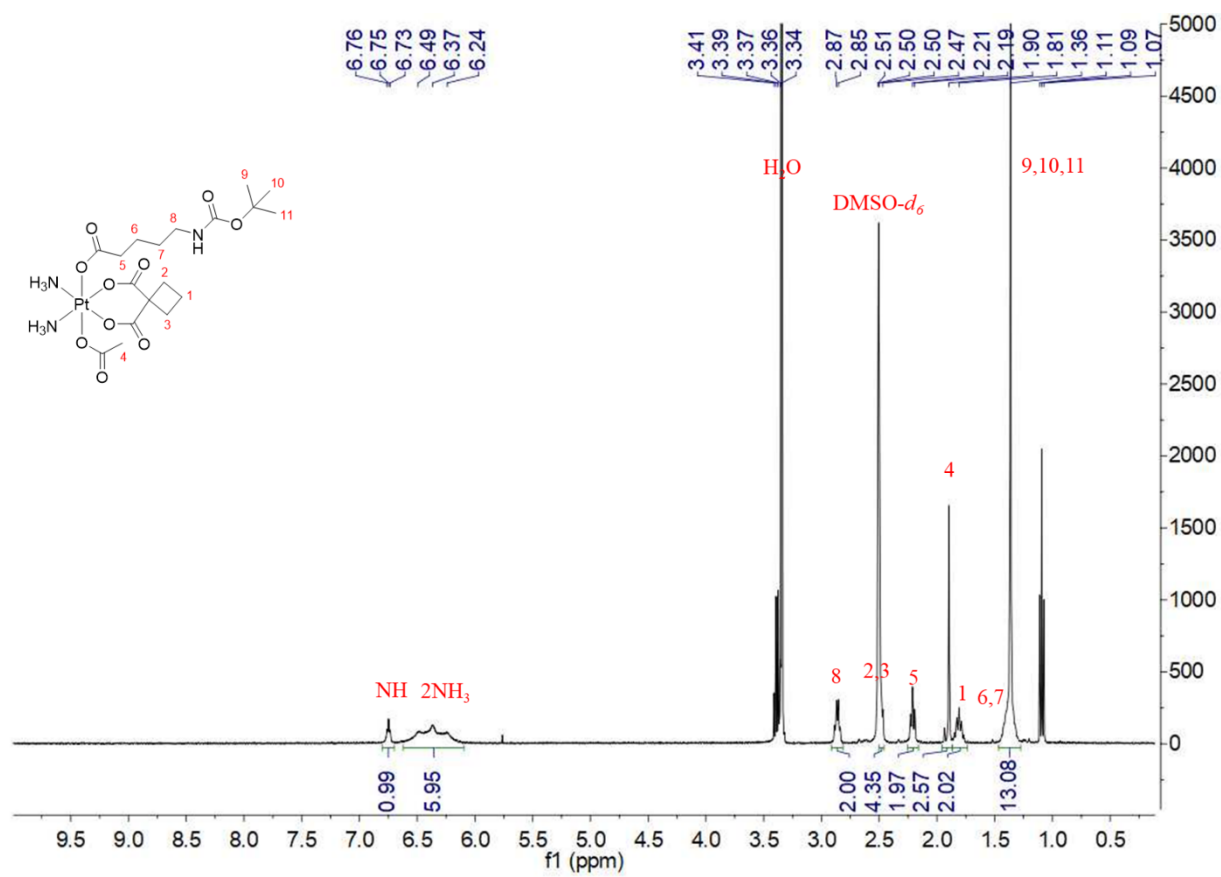

**Figure S47.** <sup>1</sup>H-NMR spectrum of compound **22** in DMSO-*d*<sub>6</sub>.

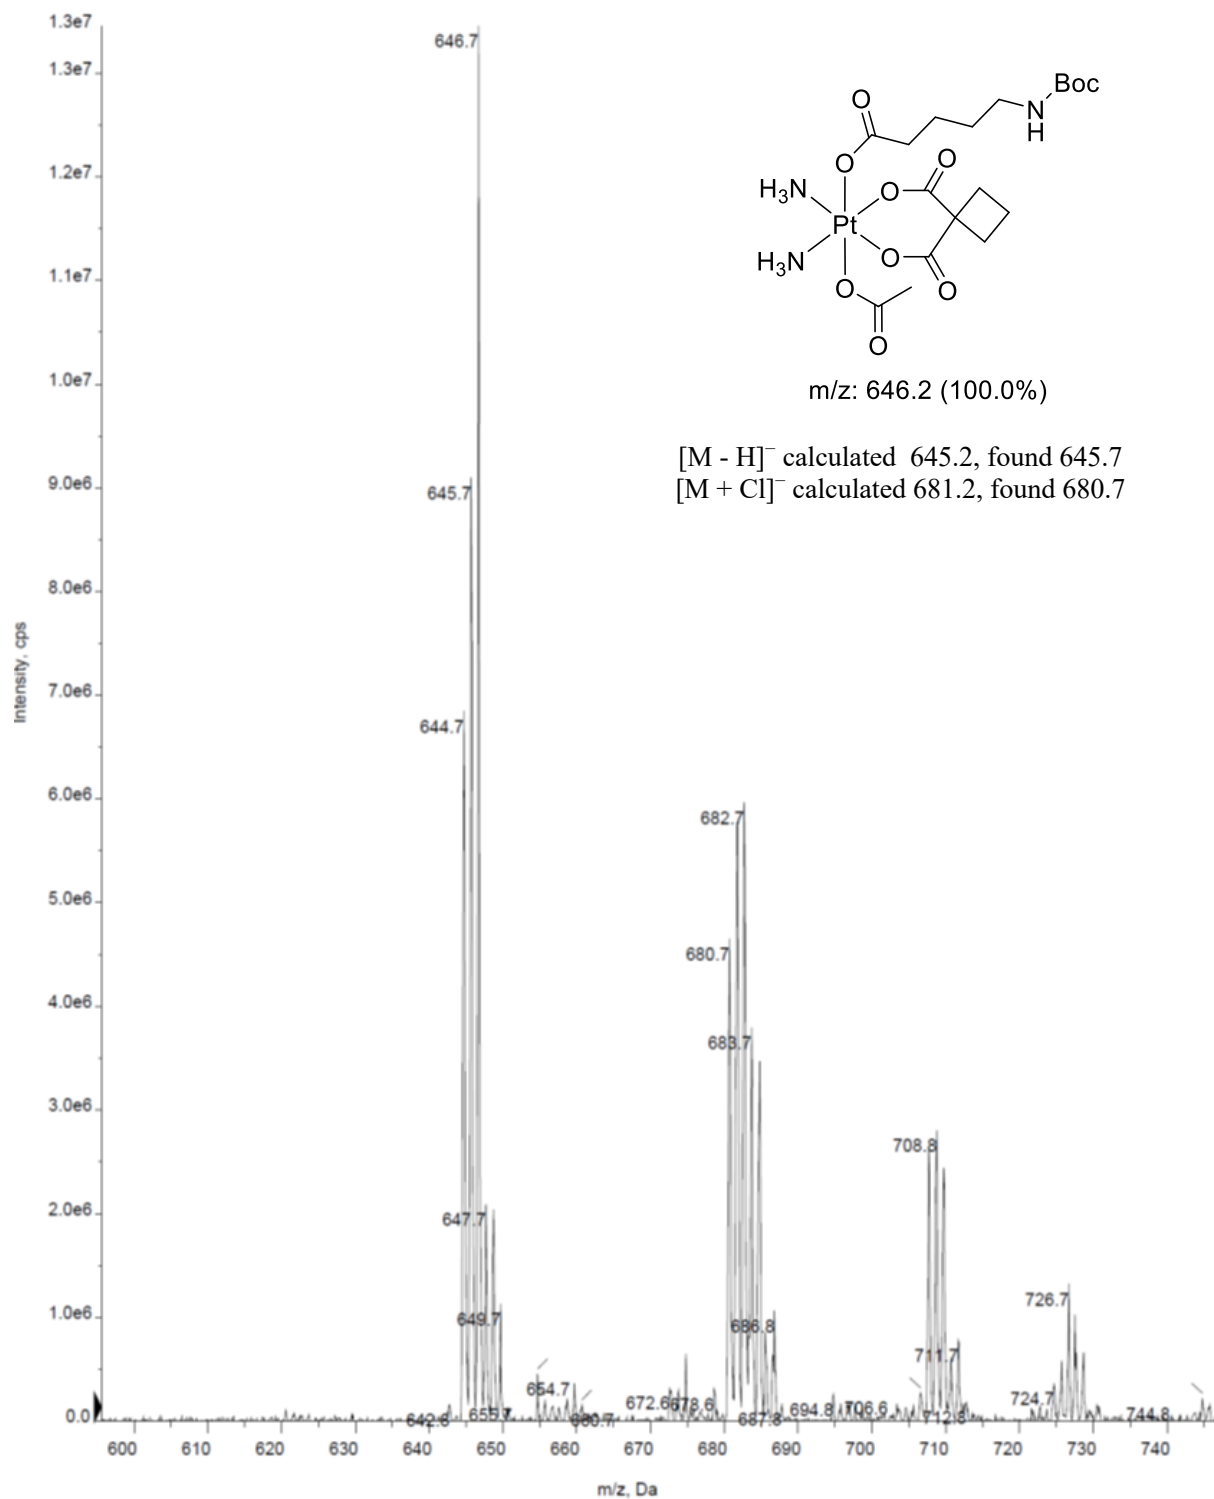

**Figure S48.** ESI-MS spectrum of compound **22**, negative mode in methanol.



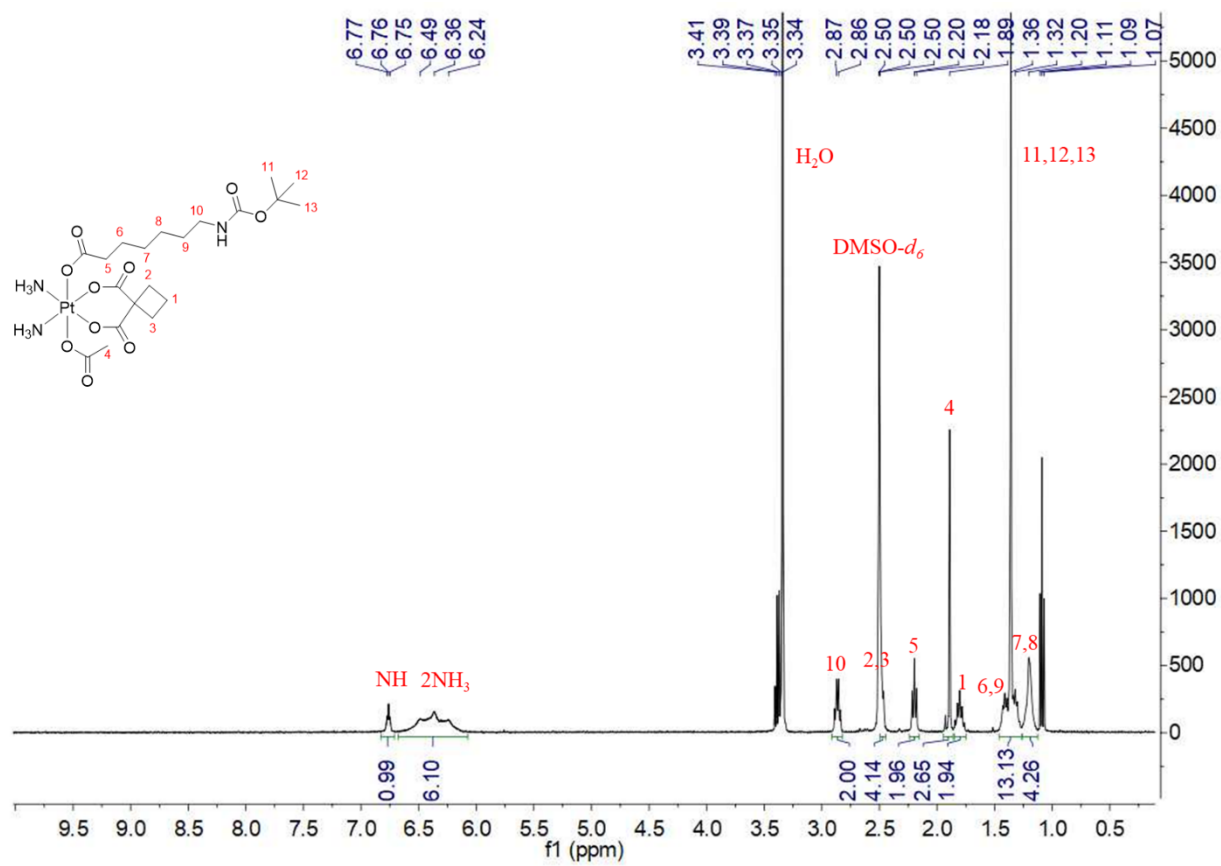

**Figure S49.** <sup>1</sup>H-NMR spectrum of compound **23** in DMSO-*d*<sub>6</sub>.

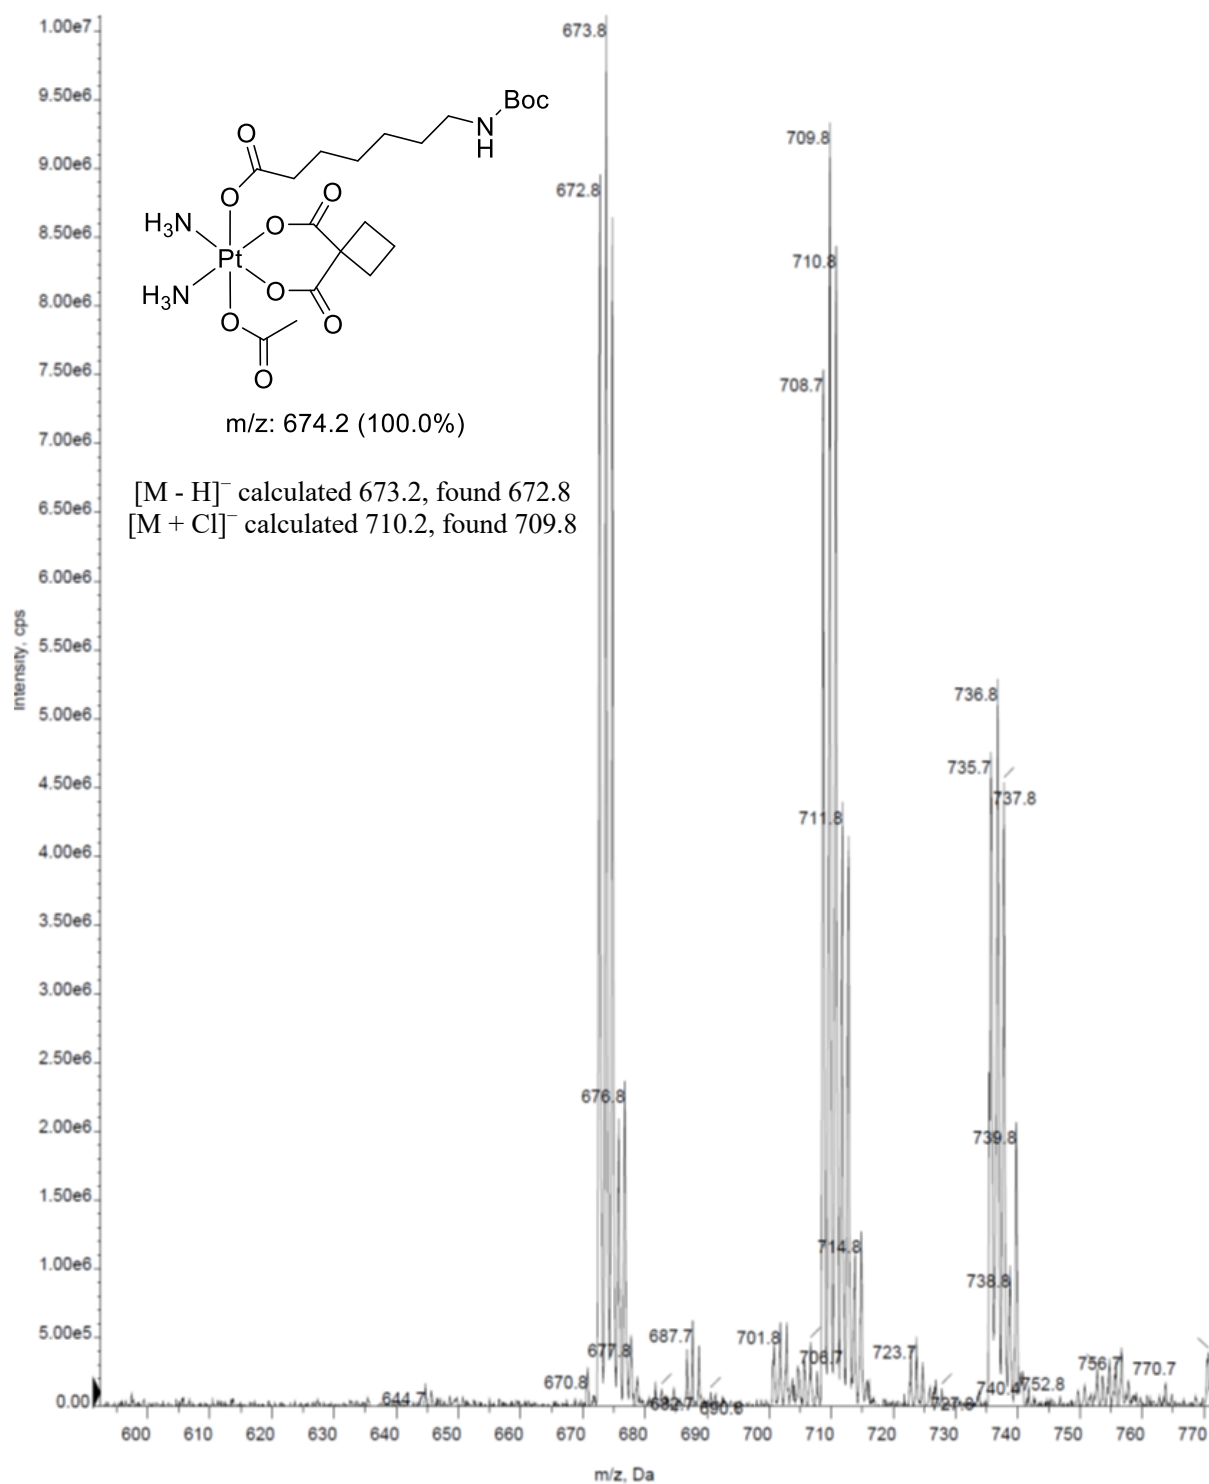

**Figure S50.** ESI-MS spectrum of compound **23**, negative mode in methanol.

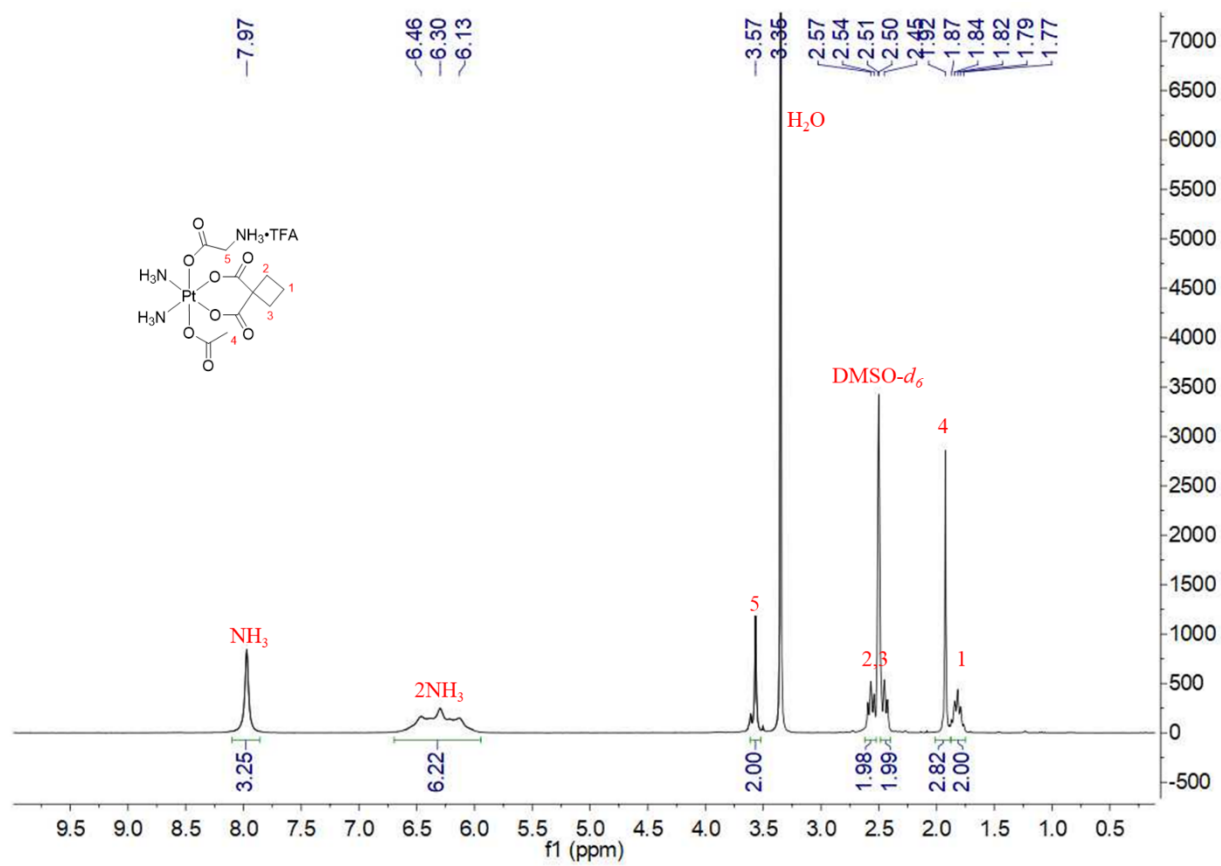

**Figure S51.** <sup>1</sup>H-NMR spectrum of compound **24** in DMSO-*d*<sub>6</sub>.

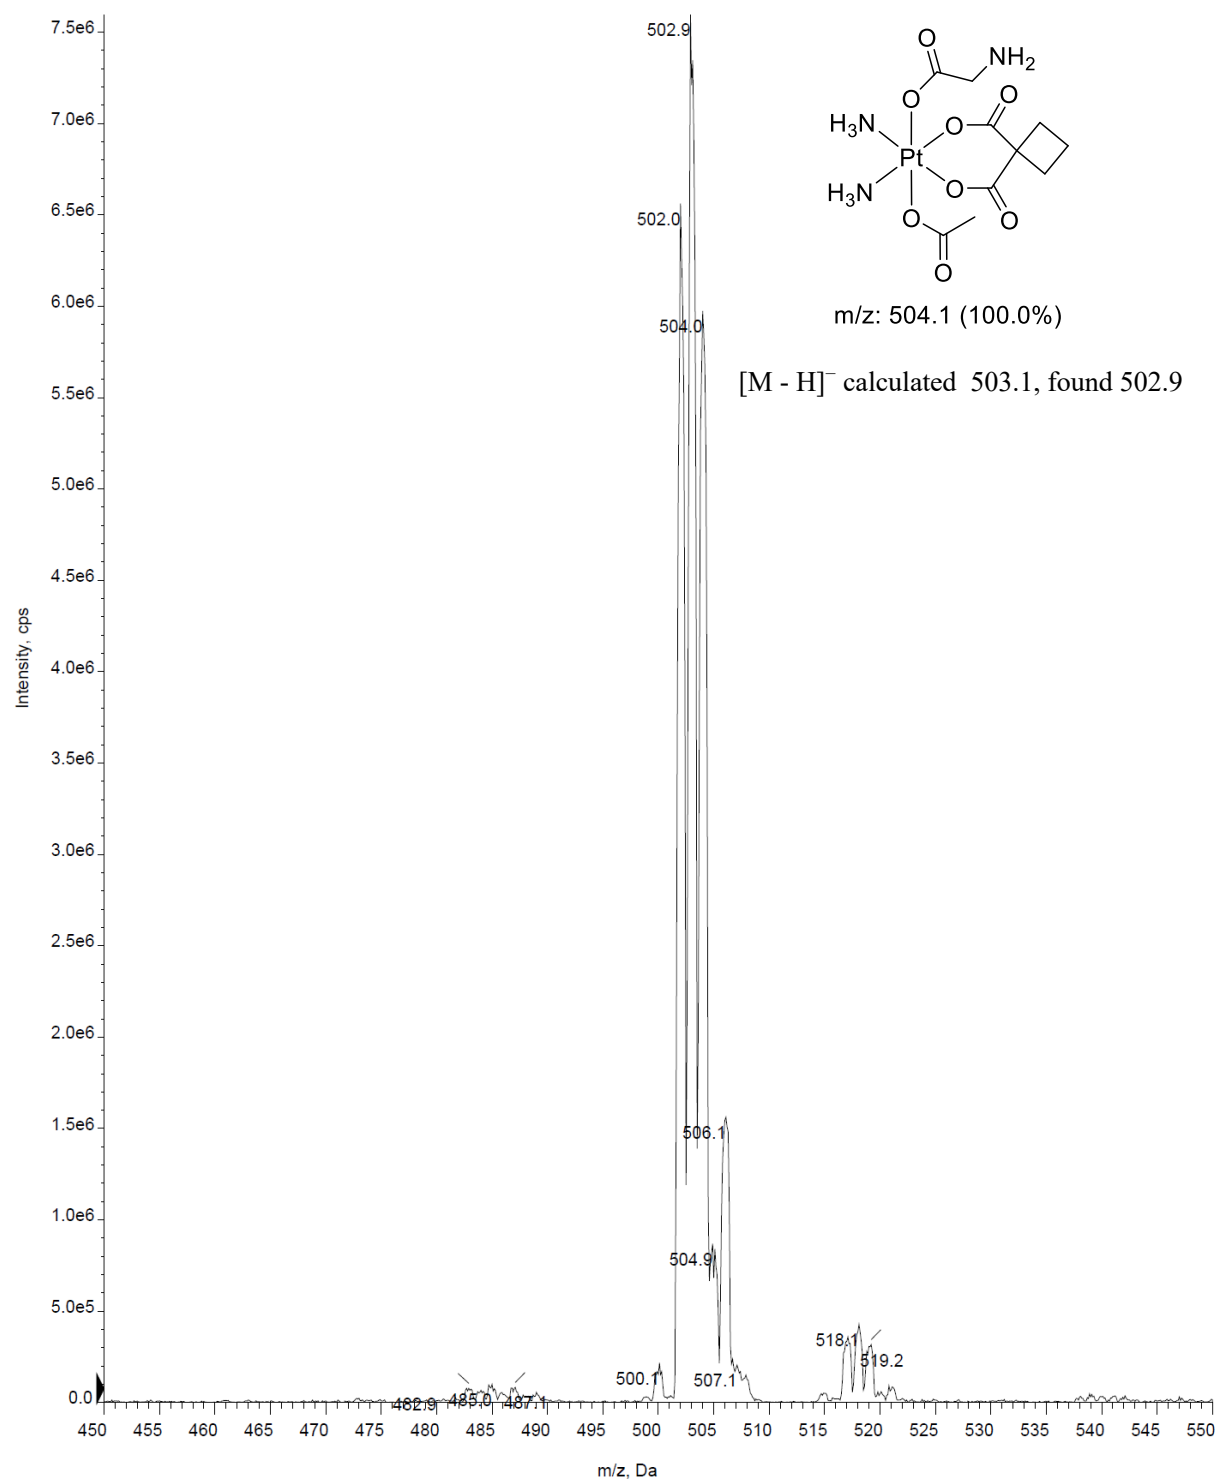

**Figure S52.** ESI-MS spectrum of compound **24**, negative mode in methanol.



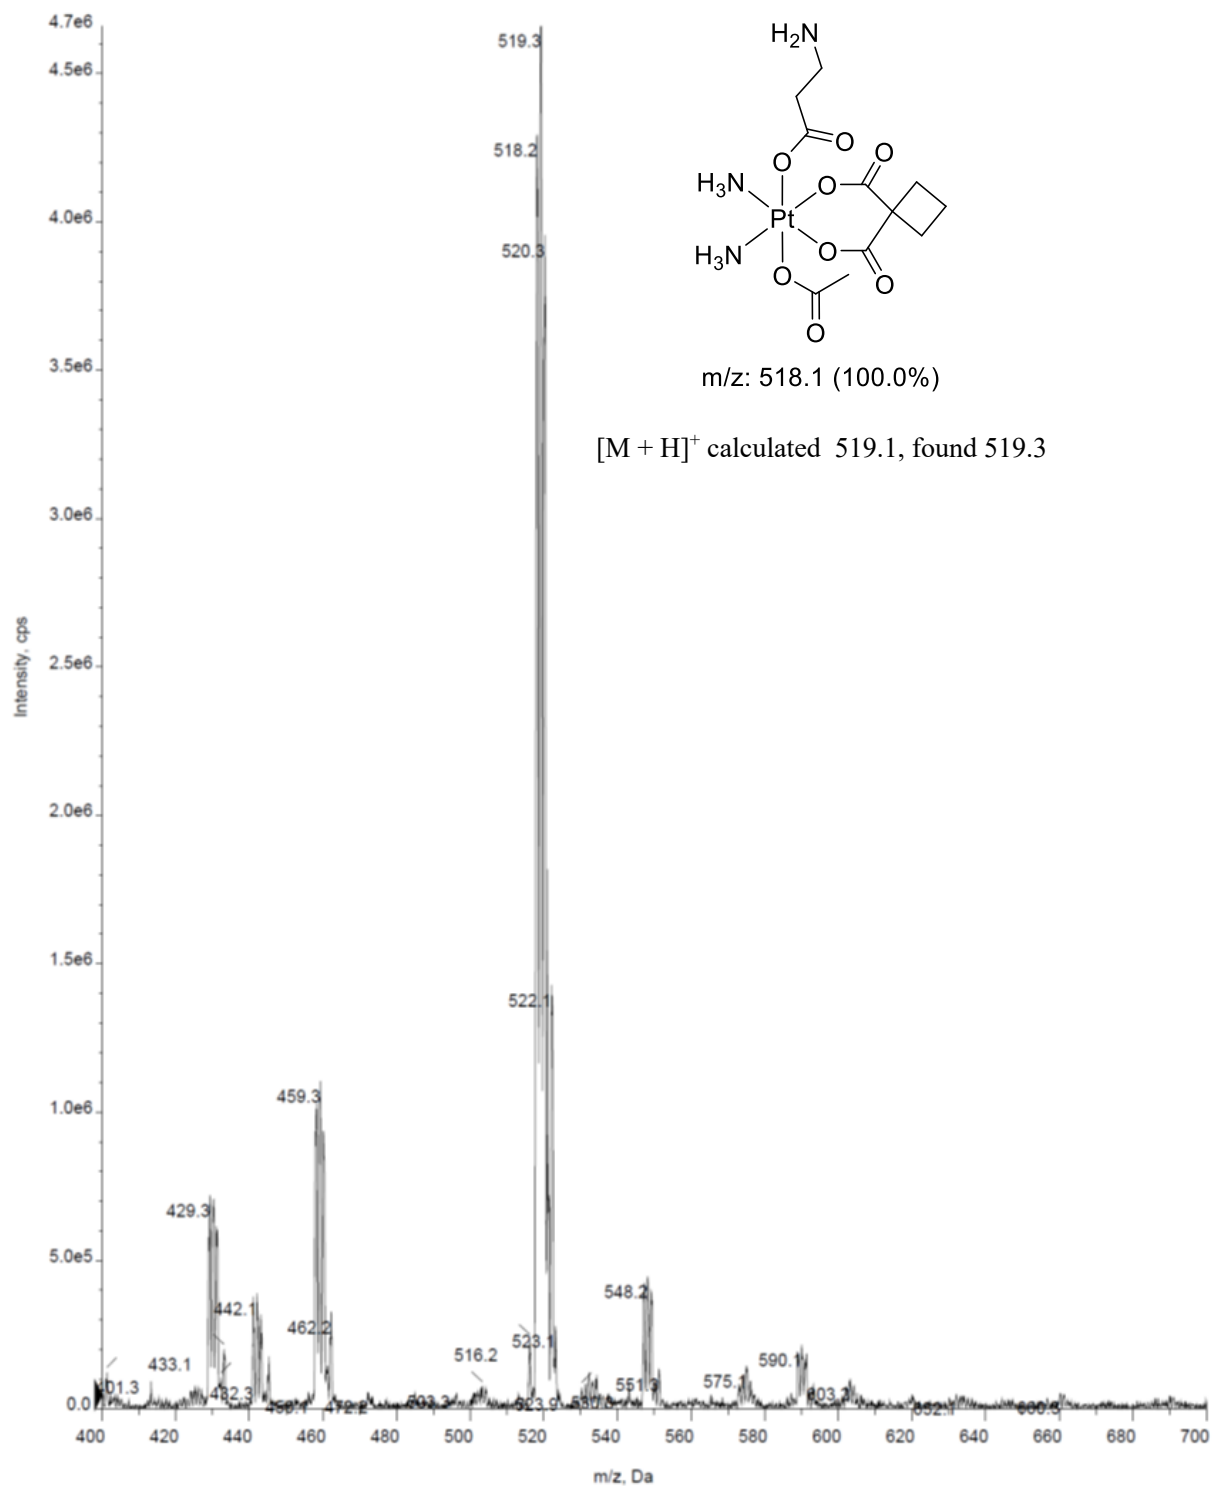

**Figure S54.** ESI-MS spectrum of compound **25**, positive mode in methanol.

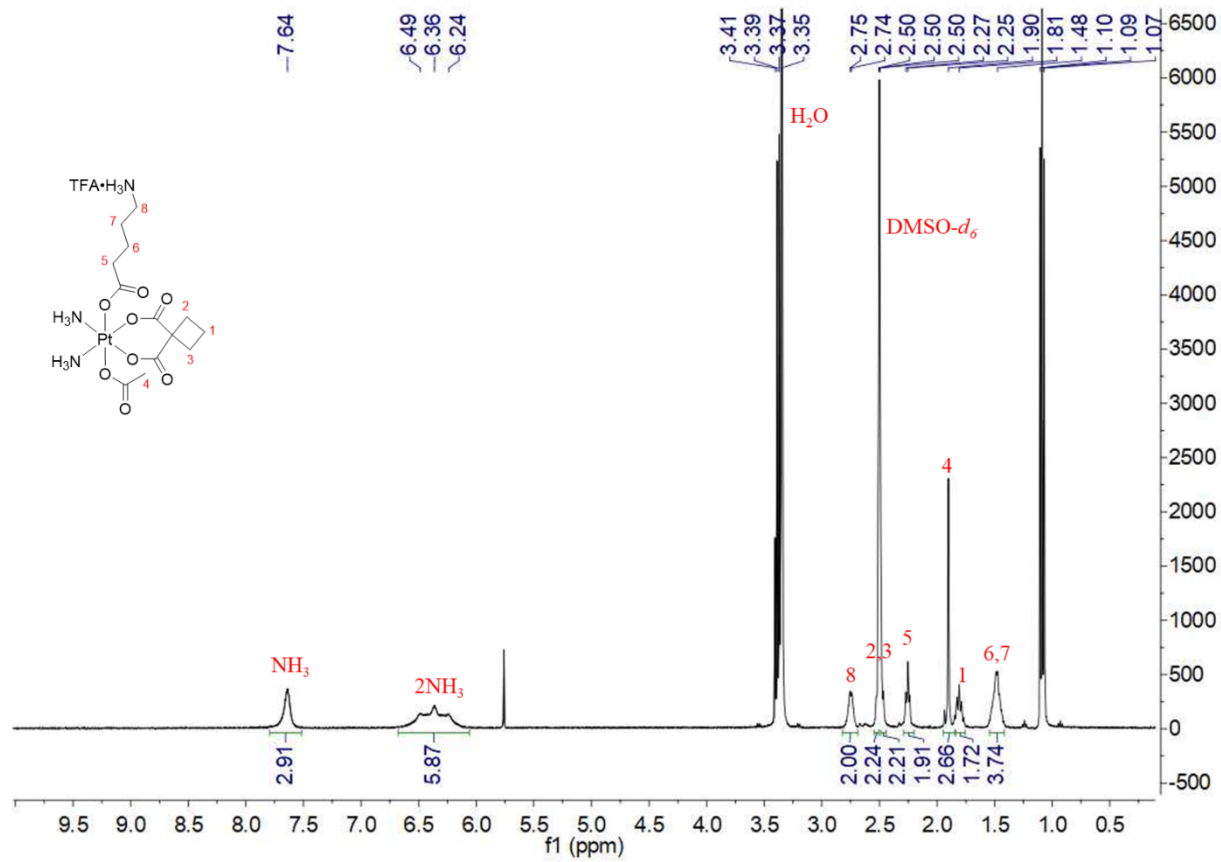

**Figure S55.** <sup>1</sup>H-NMR spectrum of compound **26** in DMSO-*d*<sub>6</sub>.

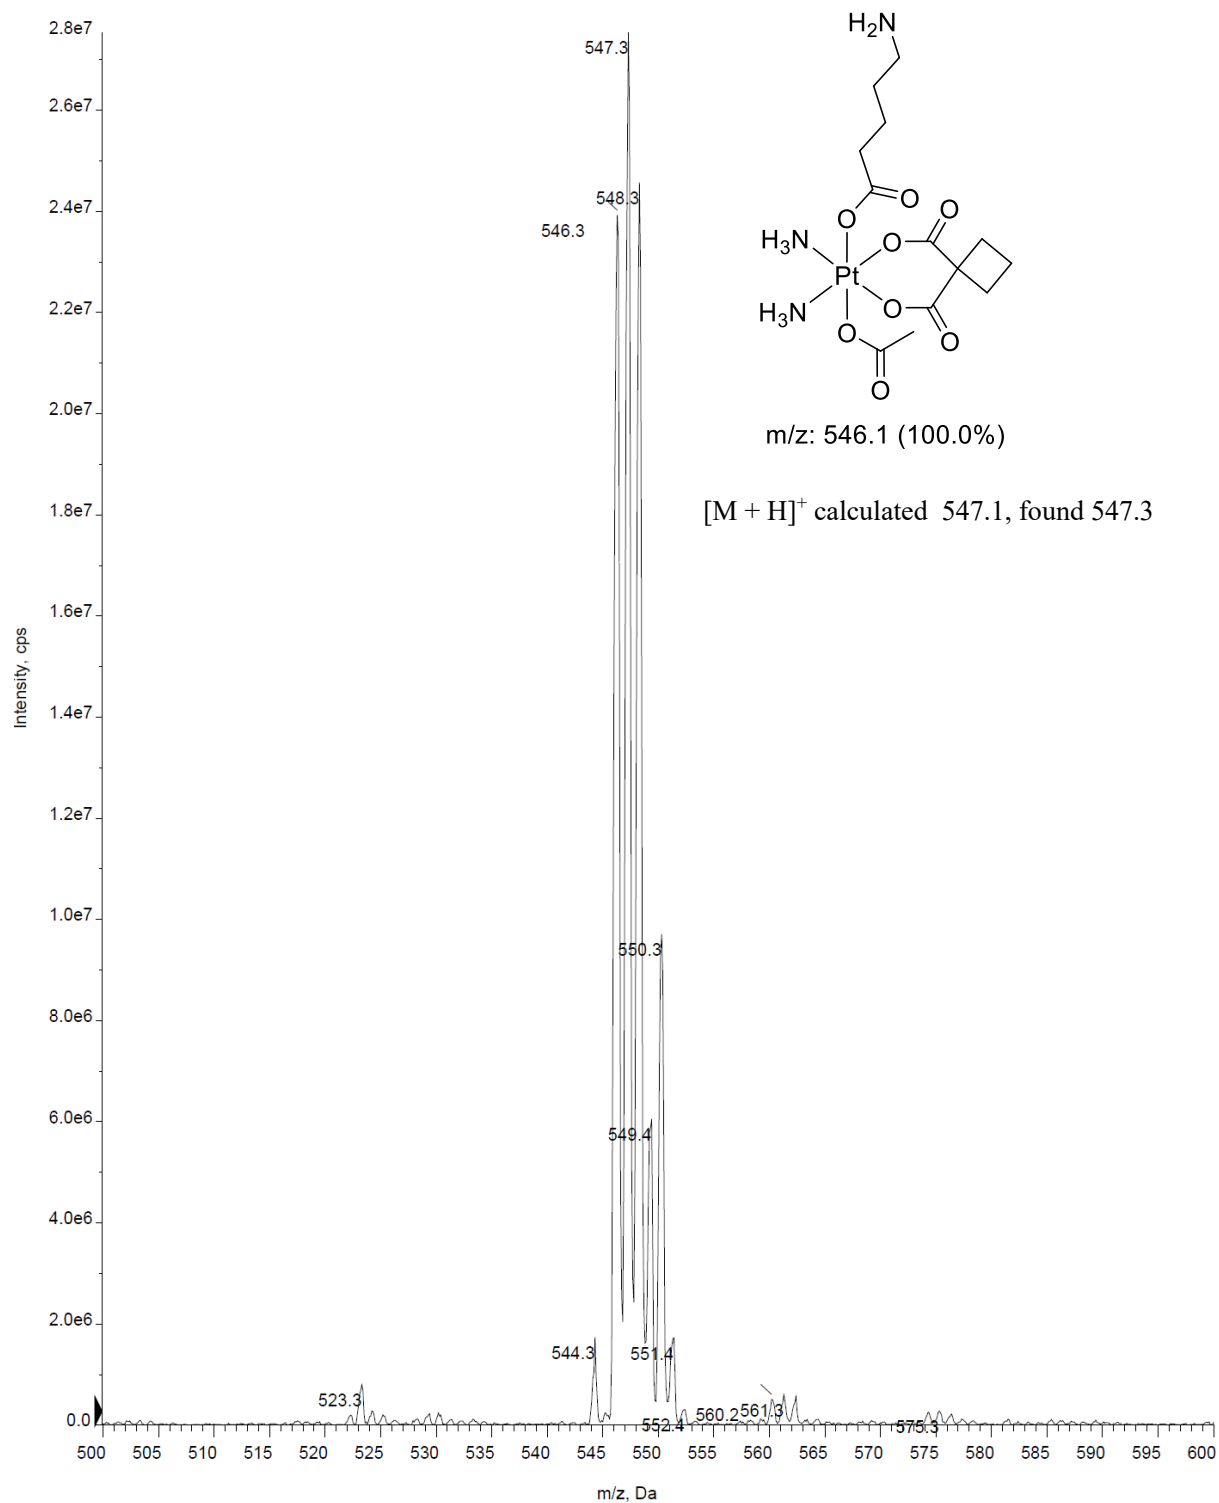

**Figure S56.** ESI-MS spectrum of compound **26**, positive mode in methanol.



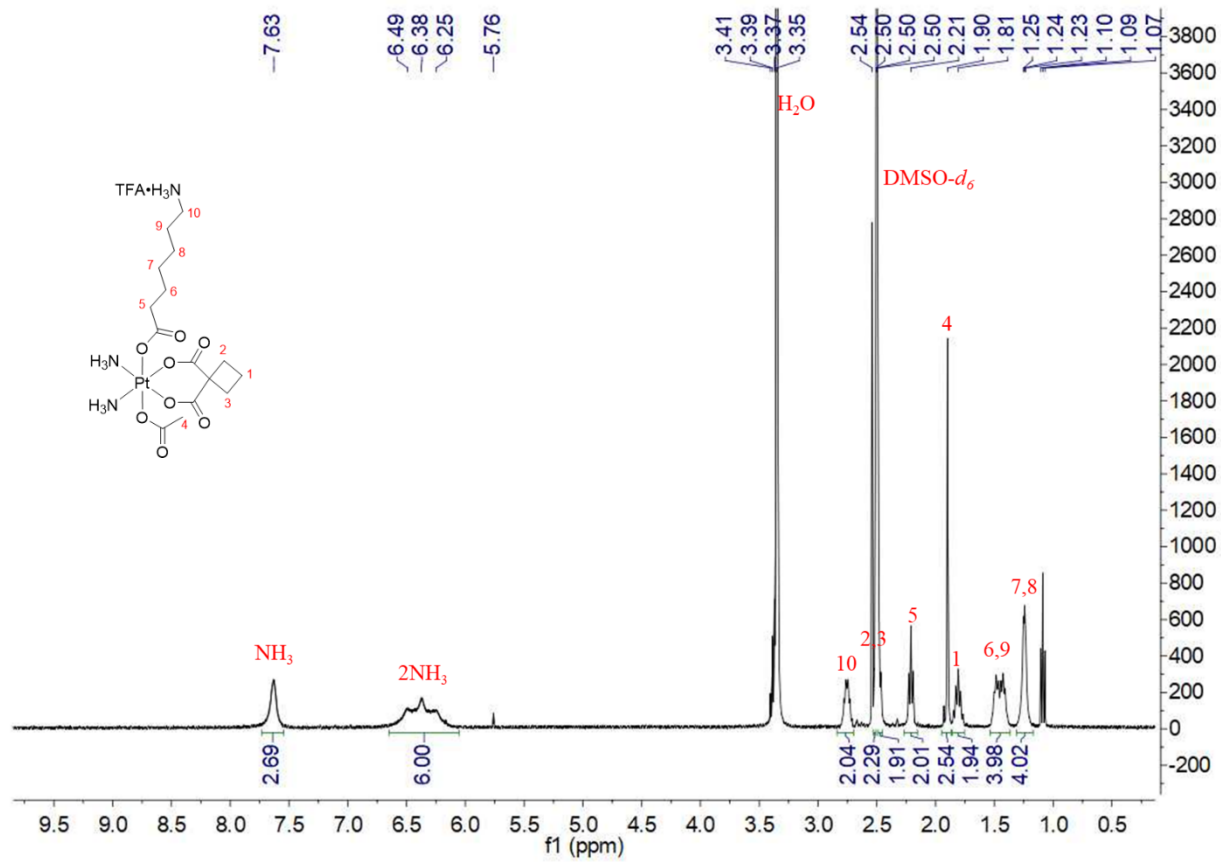

**Figure S57.** <sup>1</sup>H-NMR spectrum of compound **27** in DMSO-*d*<sub>6</sub>.

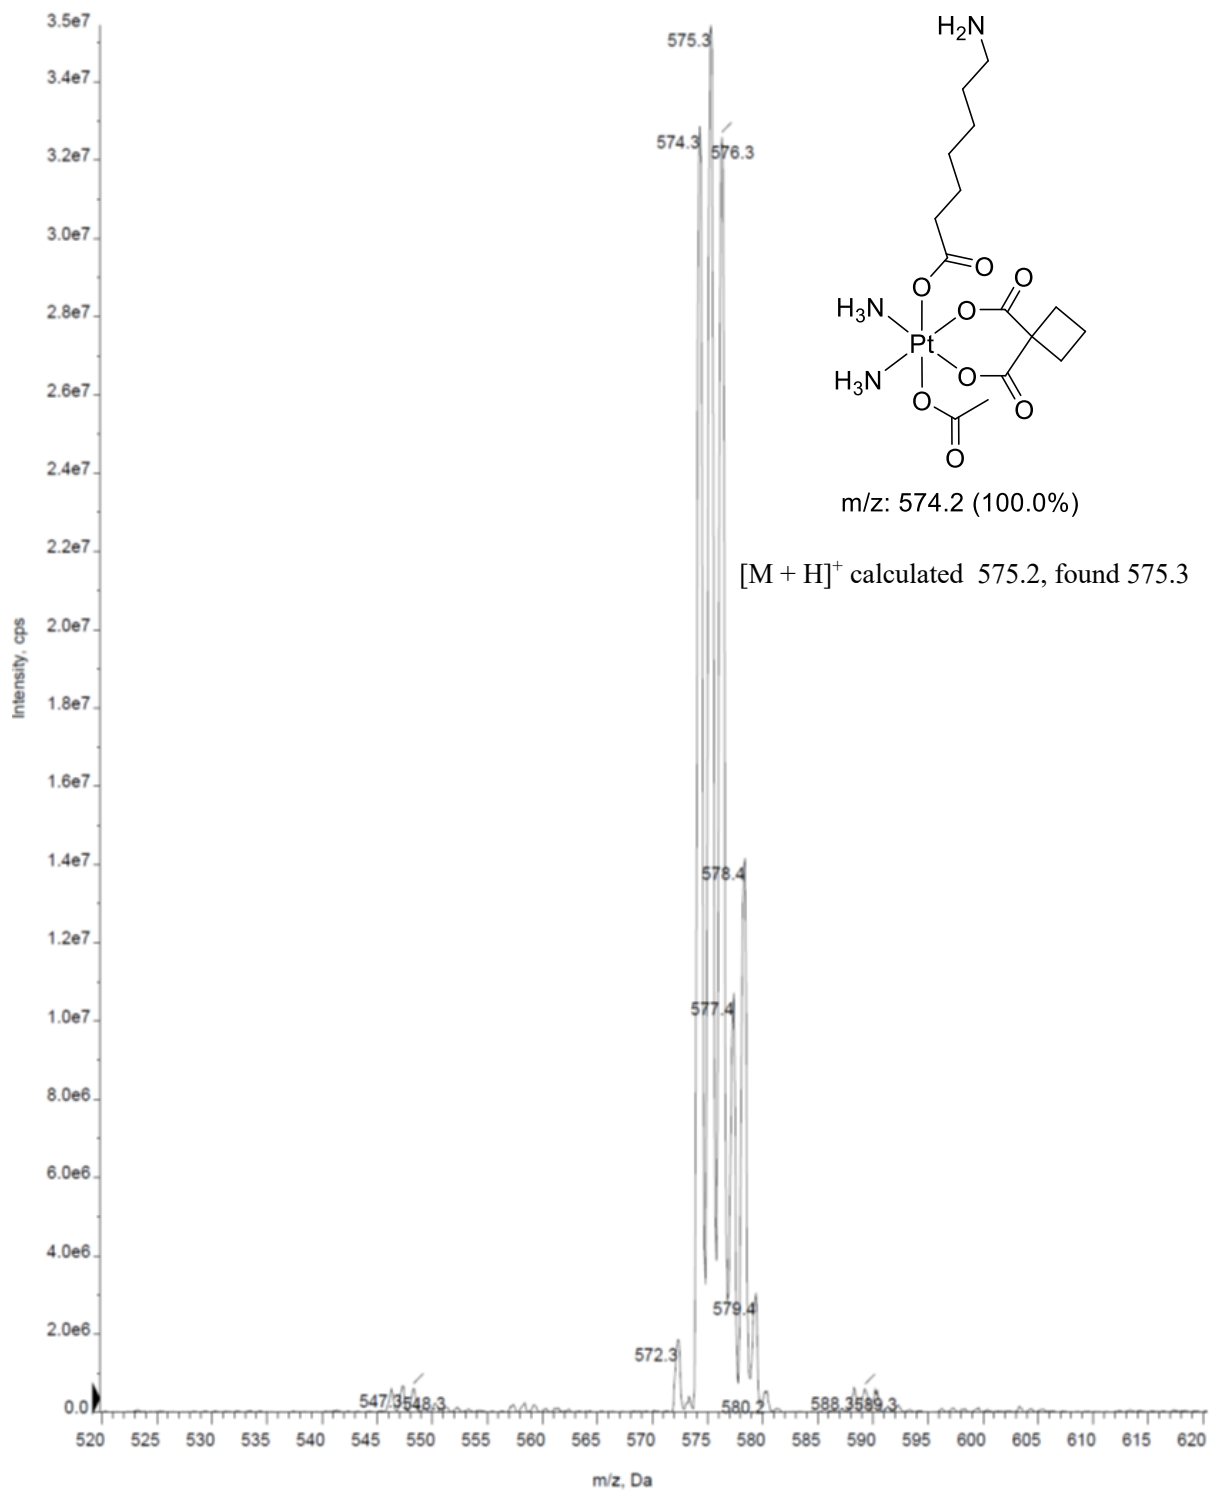

**Figure S58.** ESI-MS spectrum of compound **27**, positive mode in methanol.

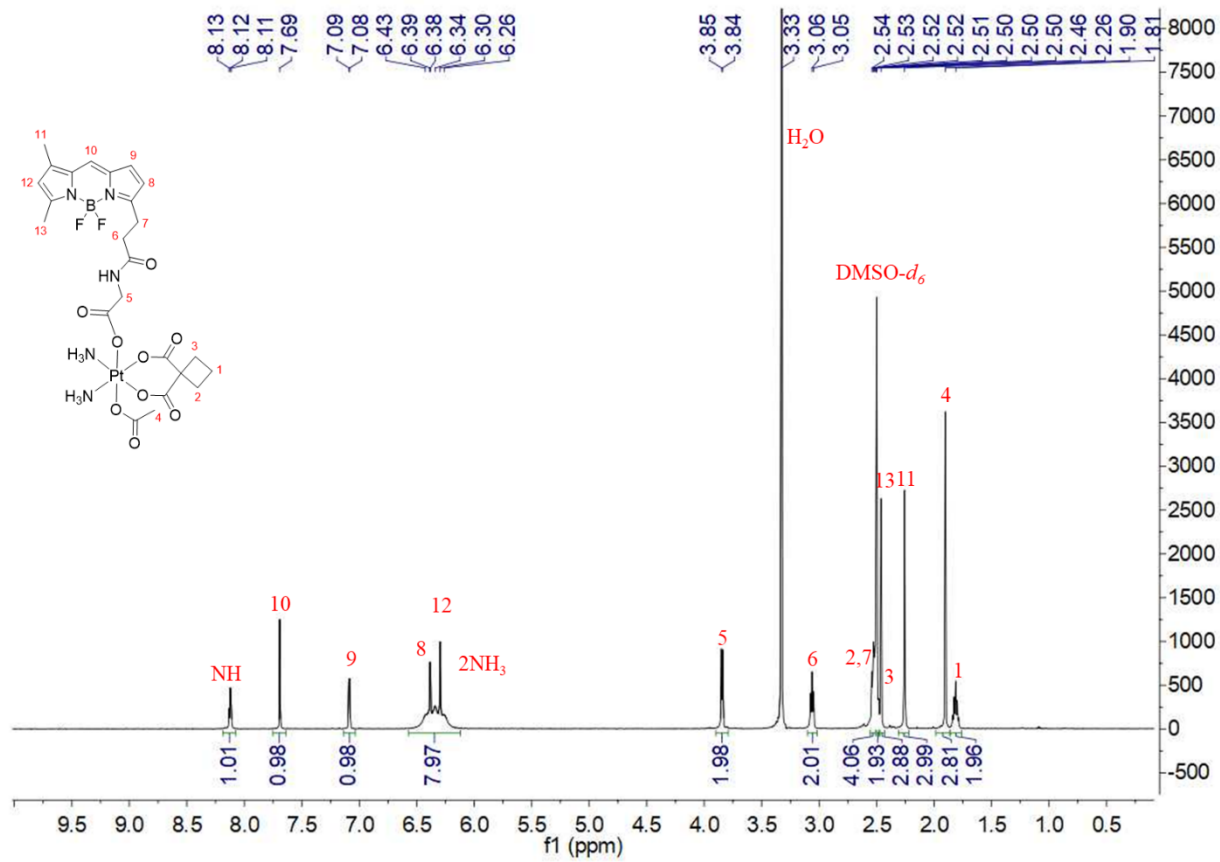

**Figure S59.** <sup>1</sup>H-NMR spectrum of complex AC3C in DMSO-*d*<sub>6</sub>.

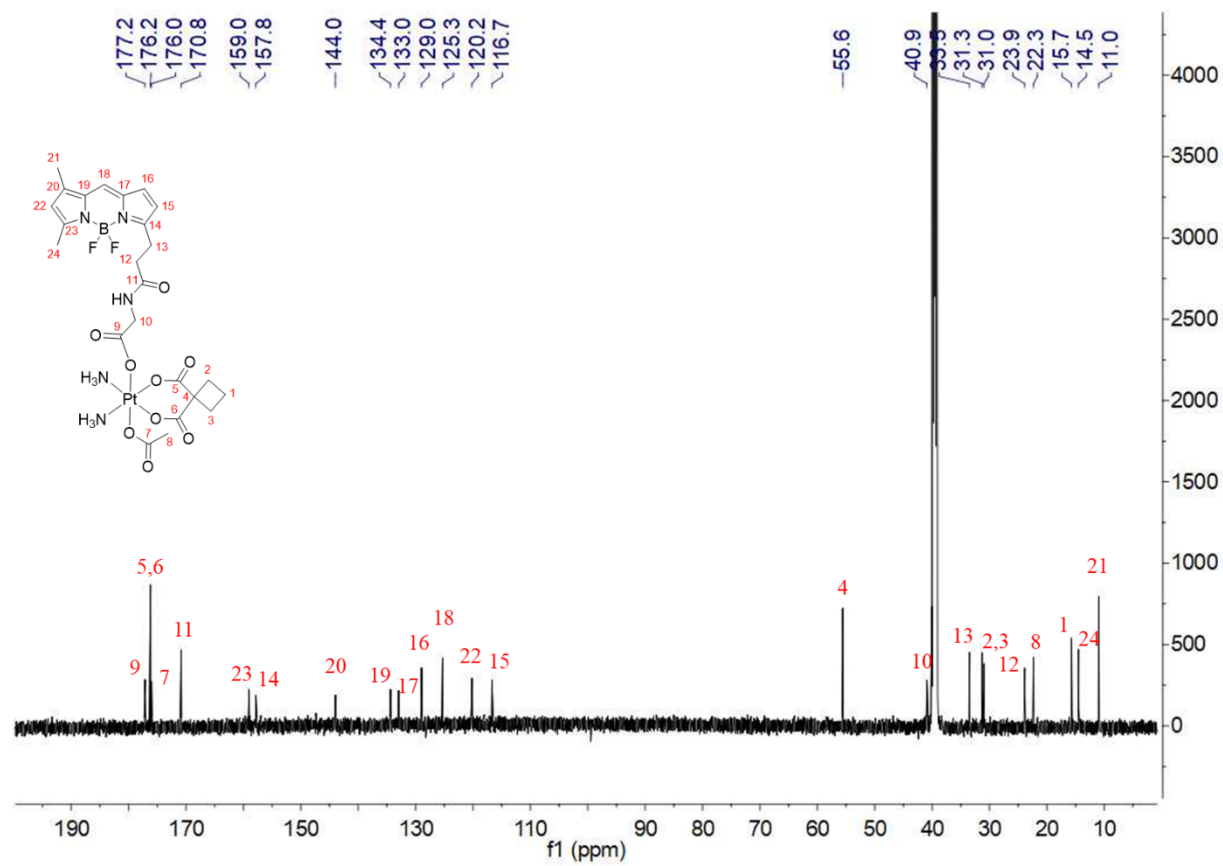

**Figure S60.**  $^{13}\text{C}$ -NMR spectrum of complex AC3C in  $\text{DMSO}-d_6$ .

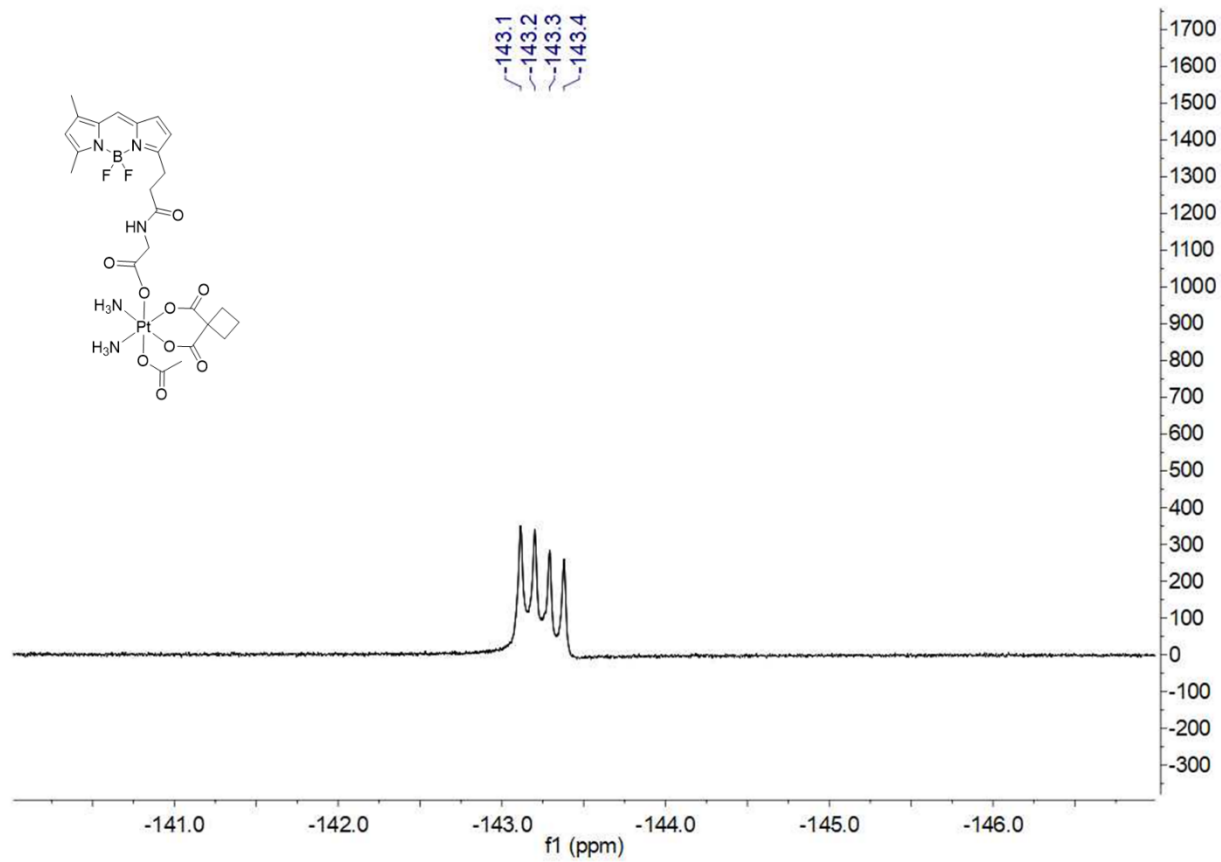

**Figure S61.**  $^{19}\text{F}$ -NMR spectrum of complex **AC3C** in  $\text{DMSO-}d_6$ .

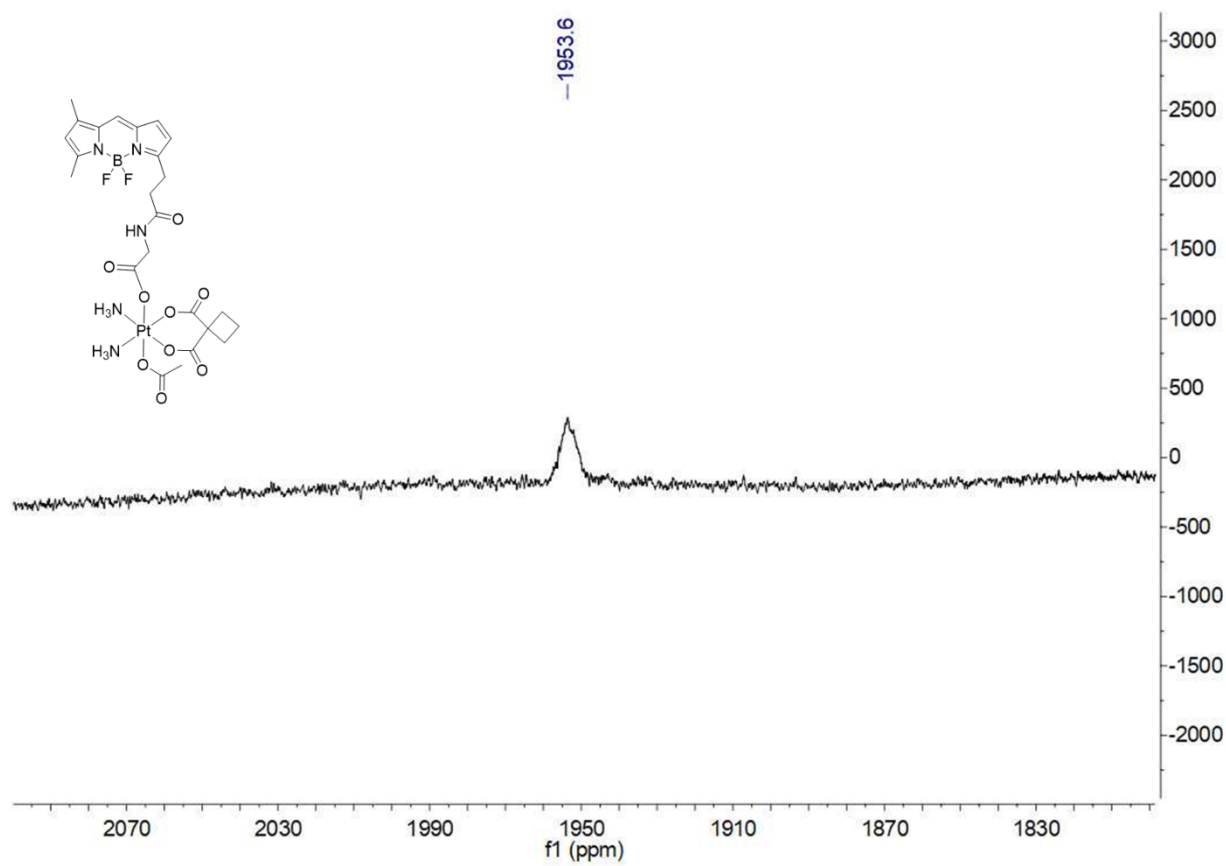

**Figure S62.**  $^{195}\text{Pt}$ -NMR spectrum of complex **AC3C** in  $\text{DMSO-}d_6$ .

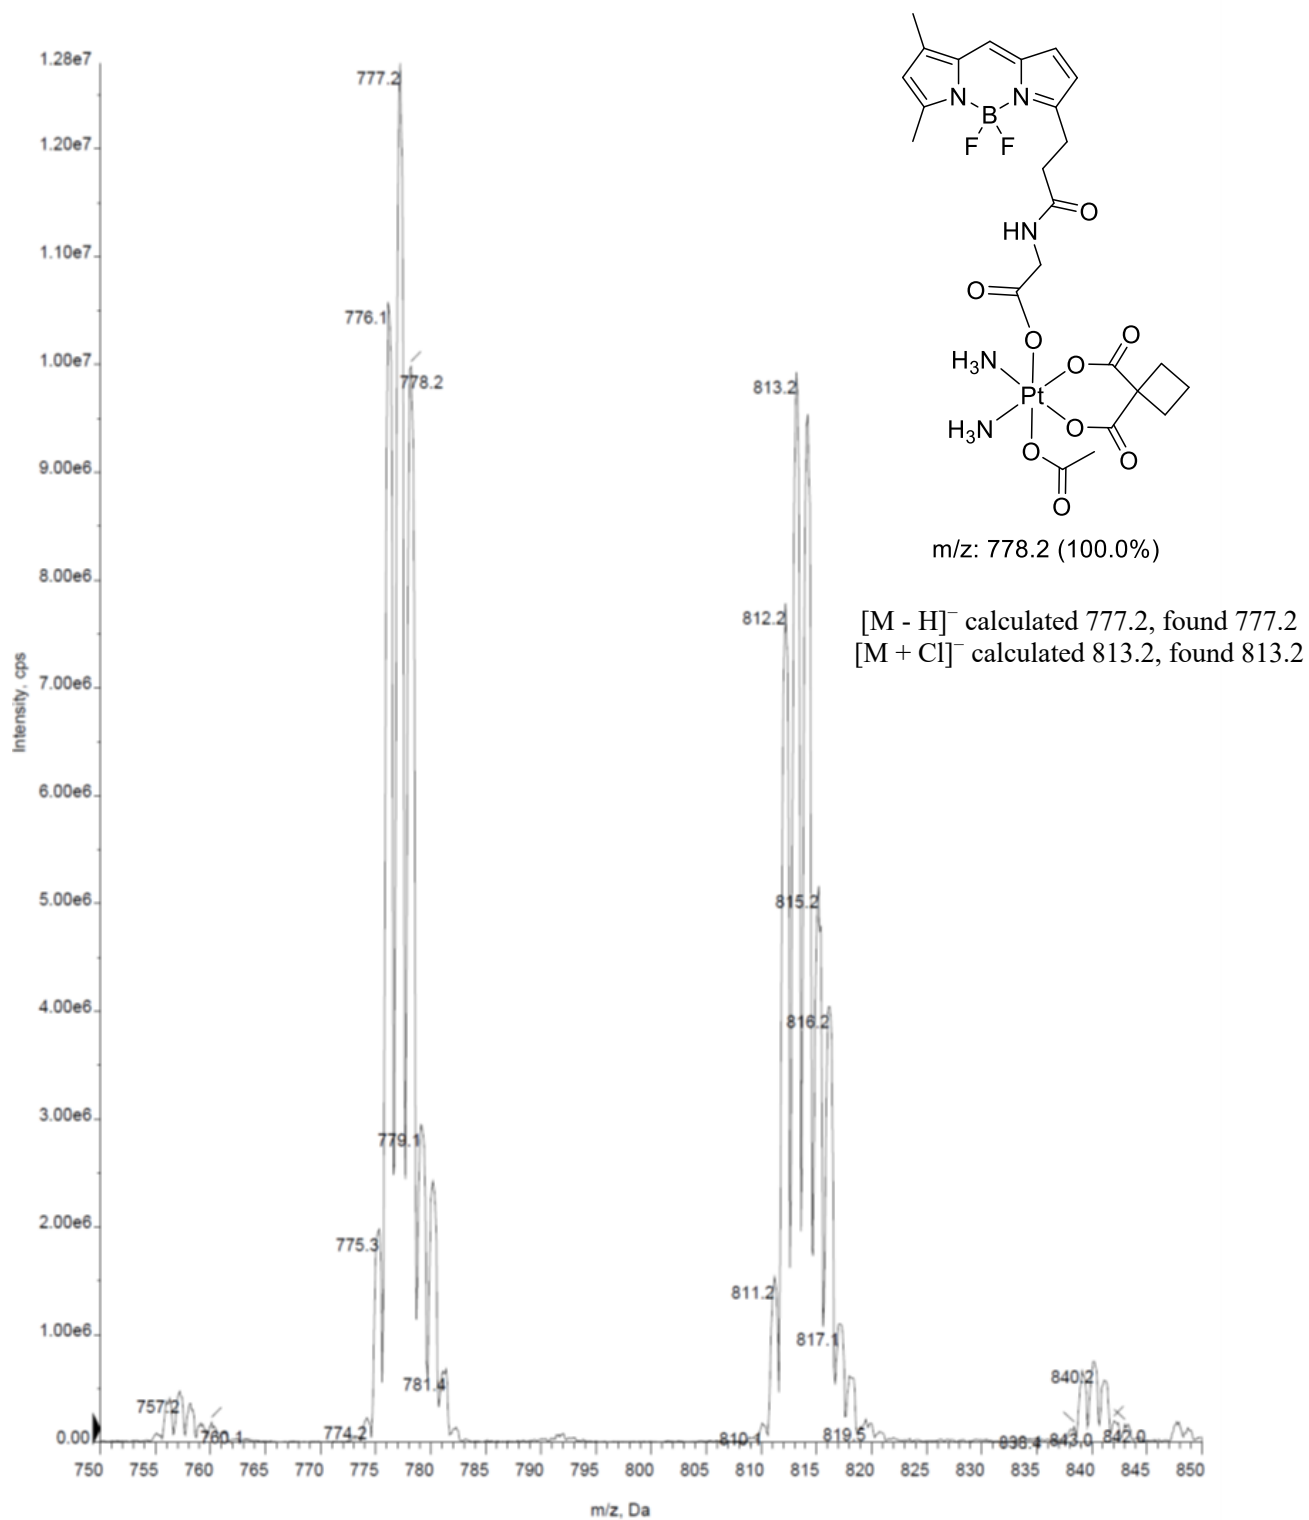

**Figure S63.** ESI-MS spectrum of complex AC3C, negative mode in methanol.

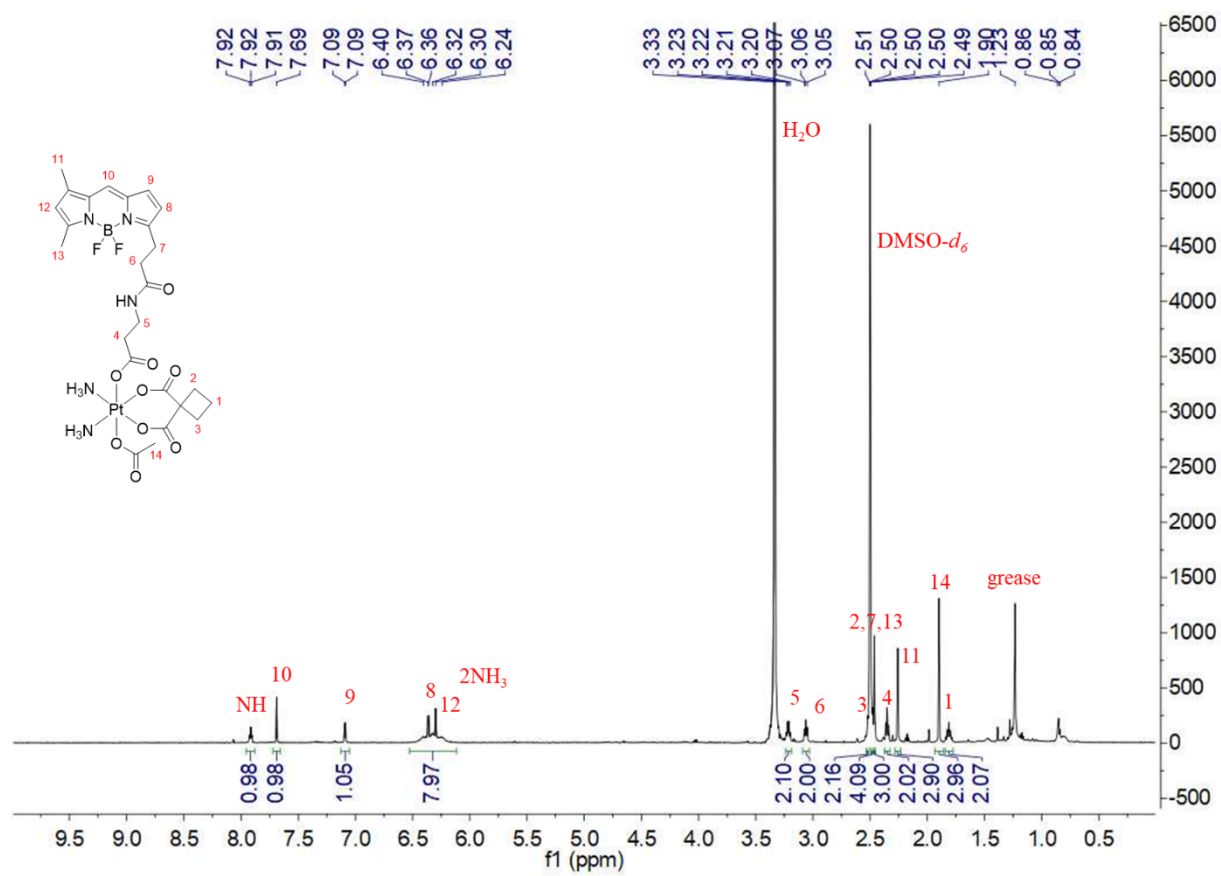

**Figure S64.** <sup>1</sup>H-NMR spectrum of complex AC4C in DMSO-*d*<sub>6</sub>.



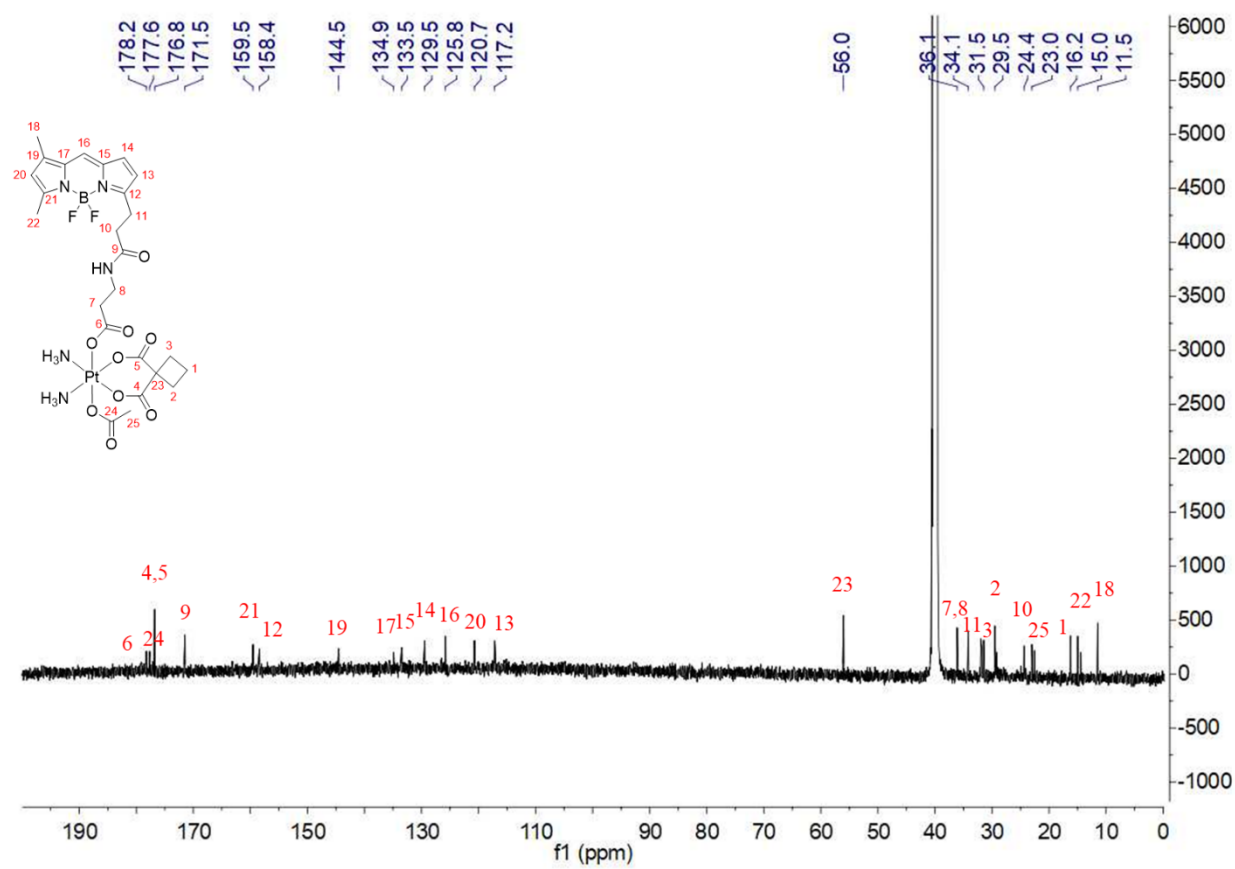

**Figure S65.** <sup>13</sup>C-NMR spectrum of complex AC4C in DMSO-*d*<sub>6</sub>.

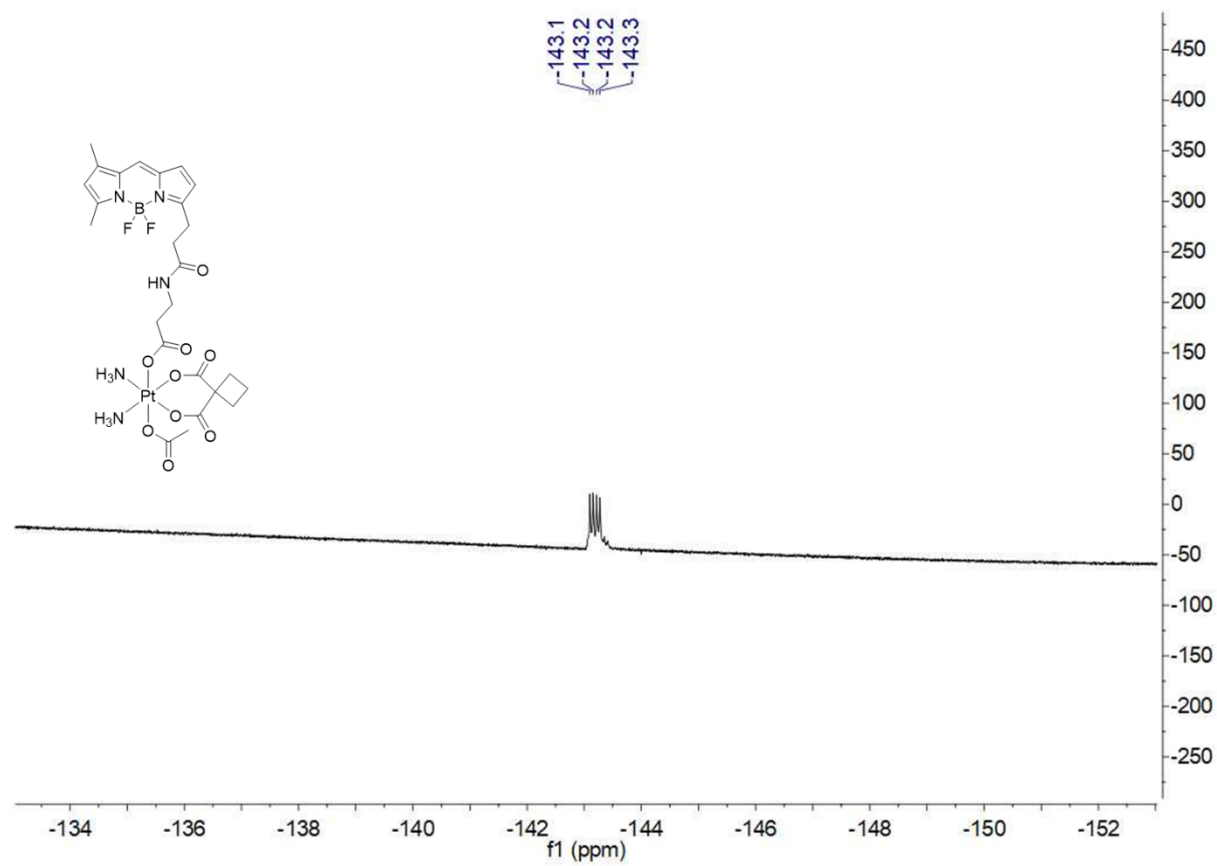

**Figure S66.**  $^{19}\text{F}$ -NMR spectrum of complex AC4C in  $\text{DMSO-}d_6$ .

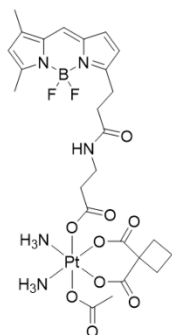

71

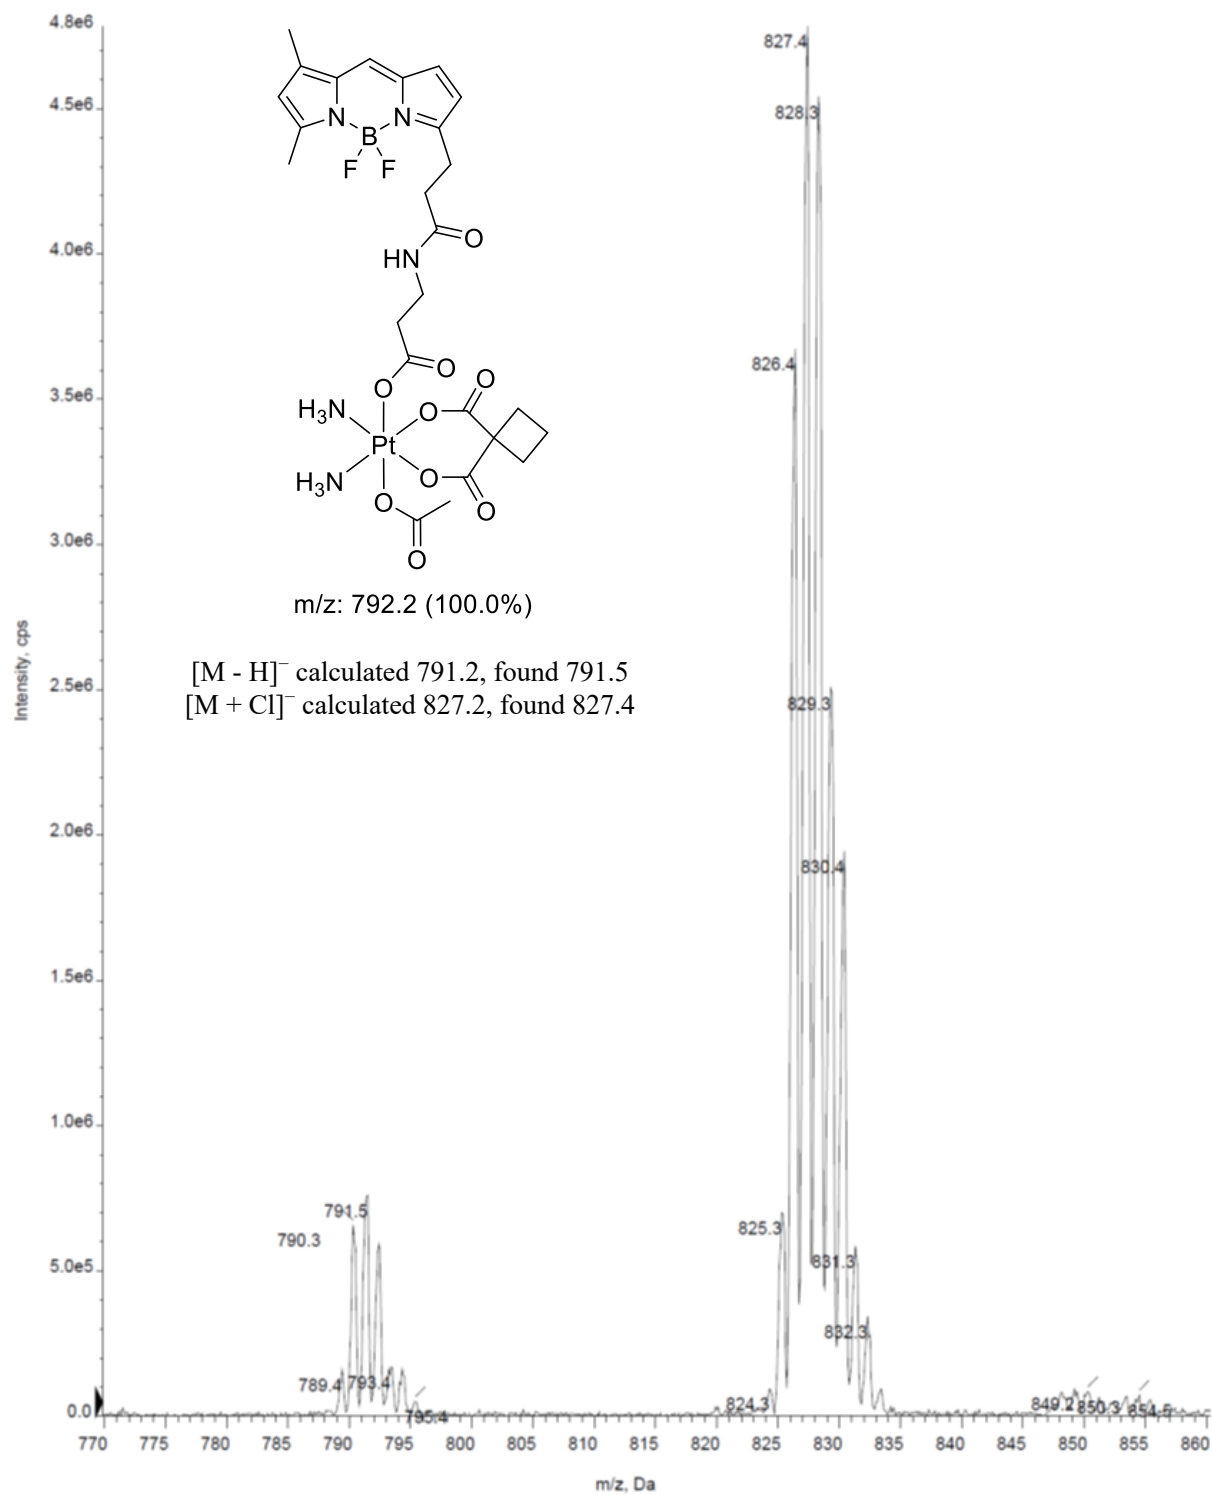

**Figure S68.** ESI-MS spectrum of complex **AC4C**, negative mode in methanol.



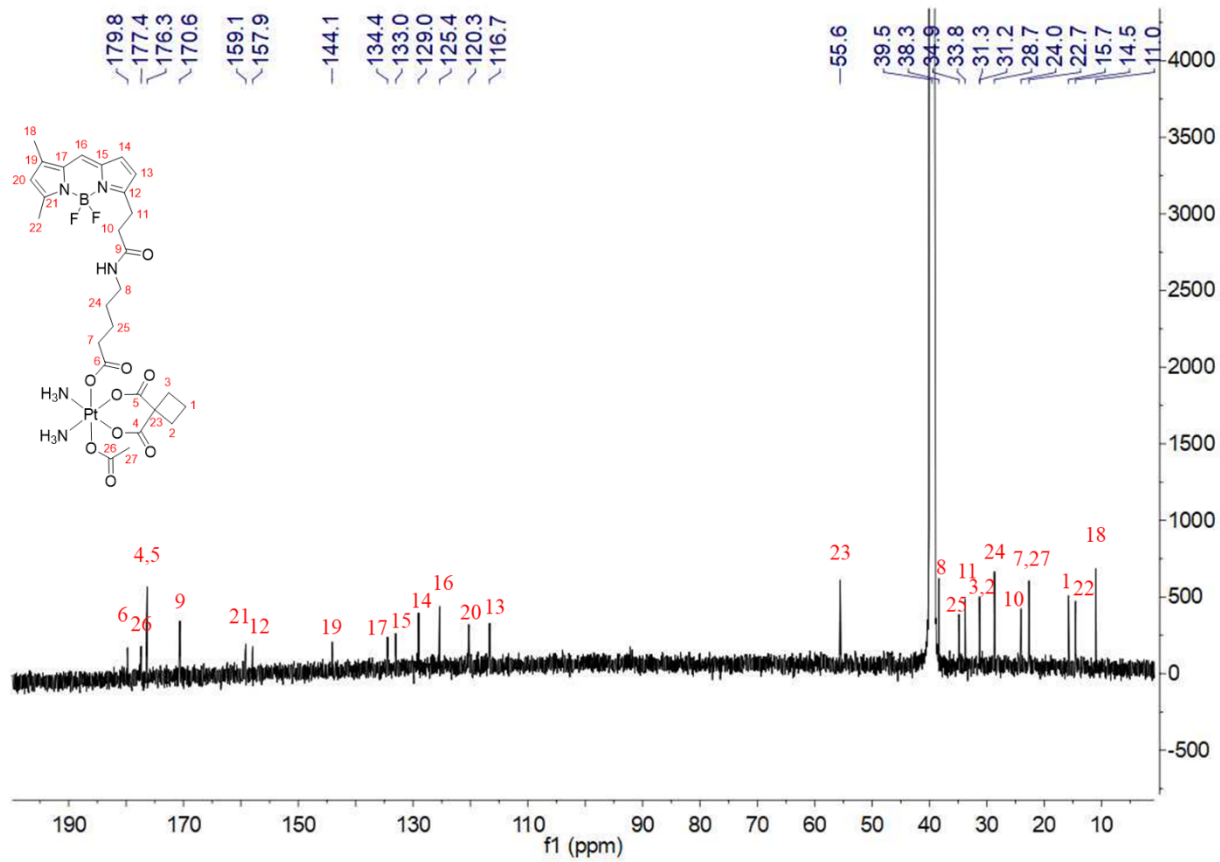

**Figure S70.**  $^{13}\text{C}$ -NMR spectrum of complex AC6C in  $\text{DMSO}-d_6$ .

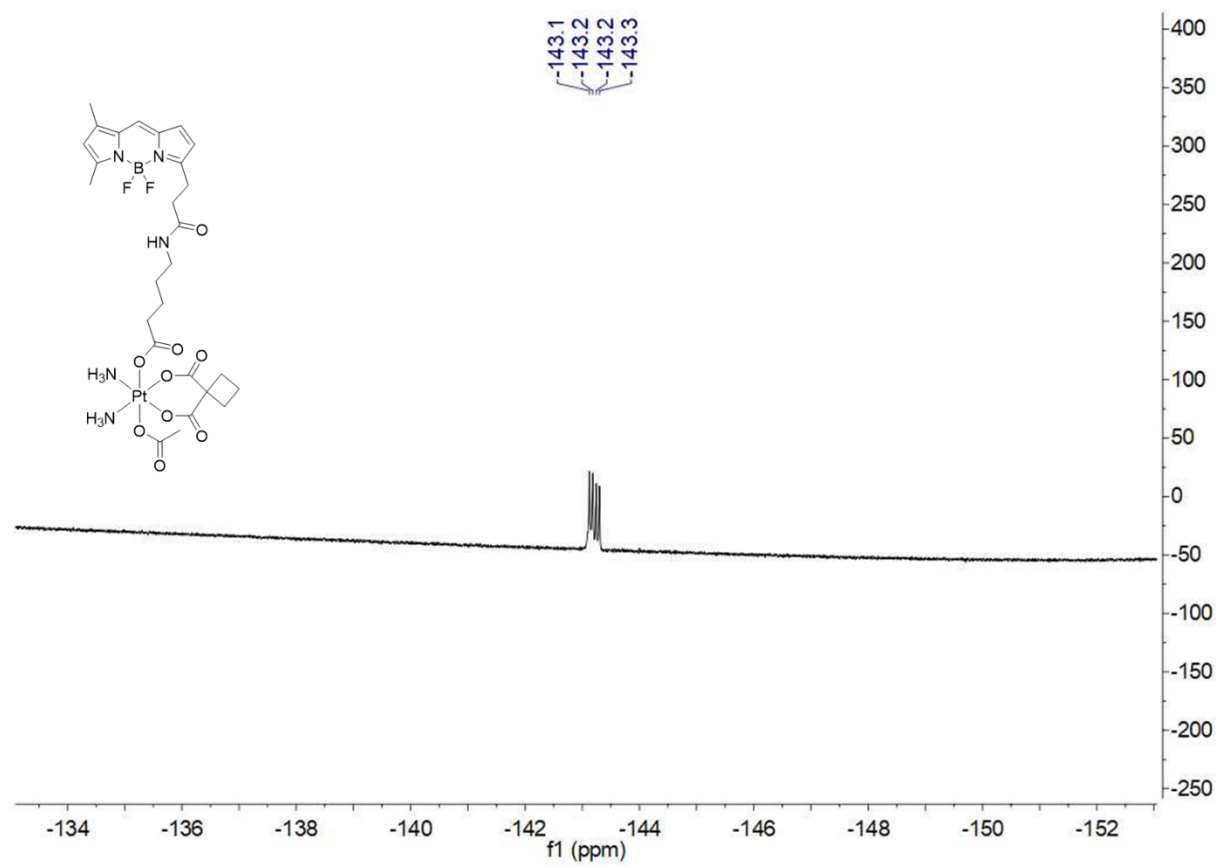

**Figure S71.**  $^{19}\text{F}$ -NMR spectrum of complex **AC6C** in  $\text{DMSO-}d_6$ .

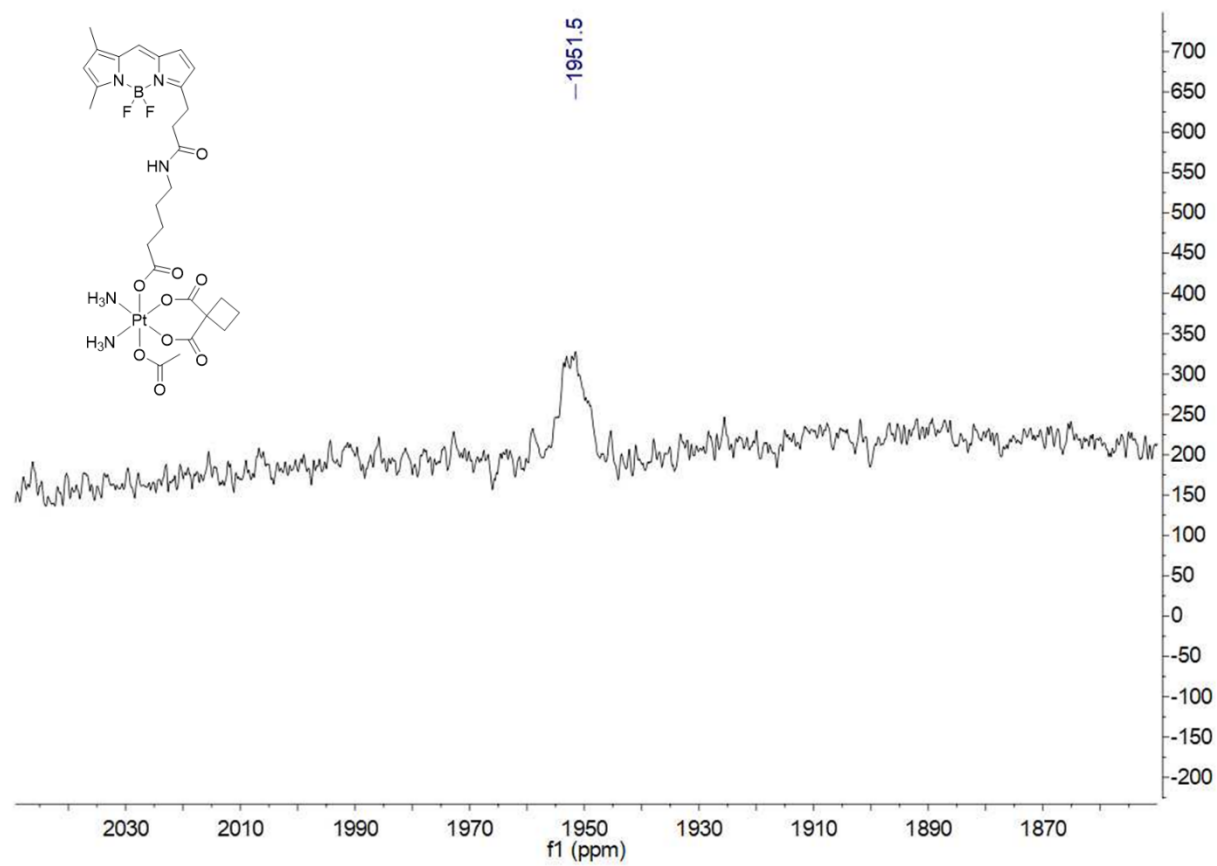

**Figure S72.**  $^{195}\text{Pt}$ -NMR spectrum of complex **AC6C** in  $\text{DMSO}-d_6$ .



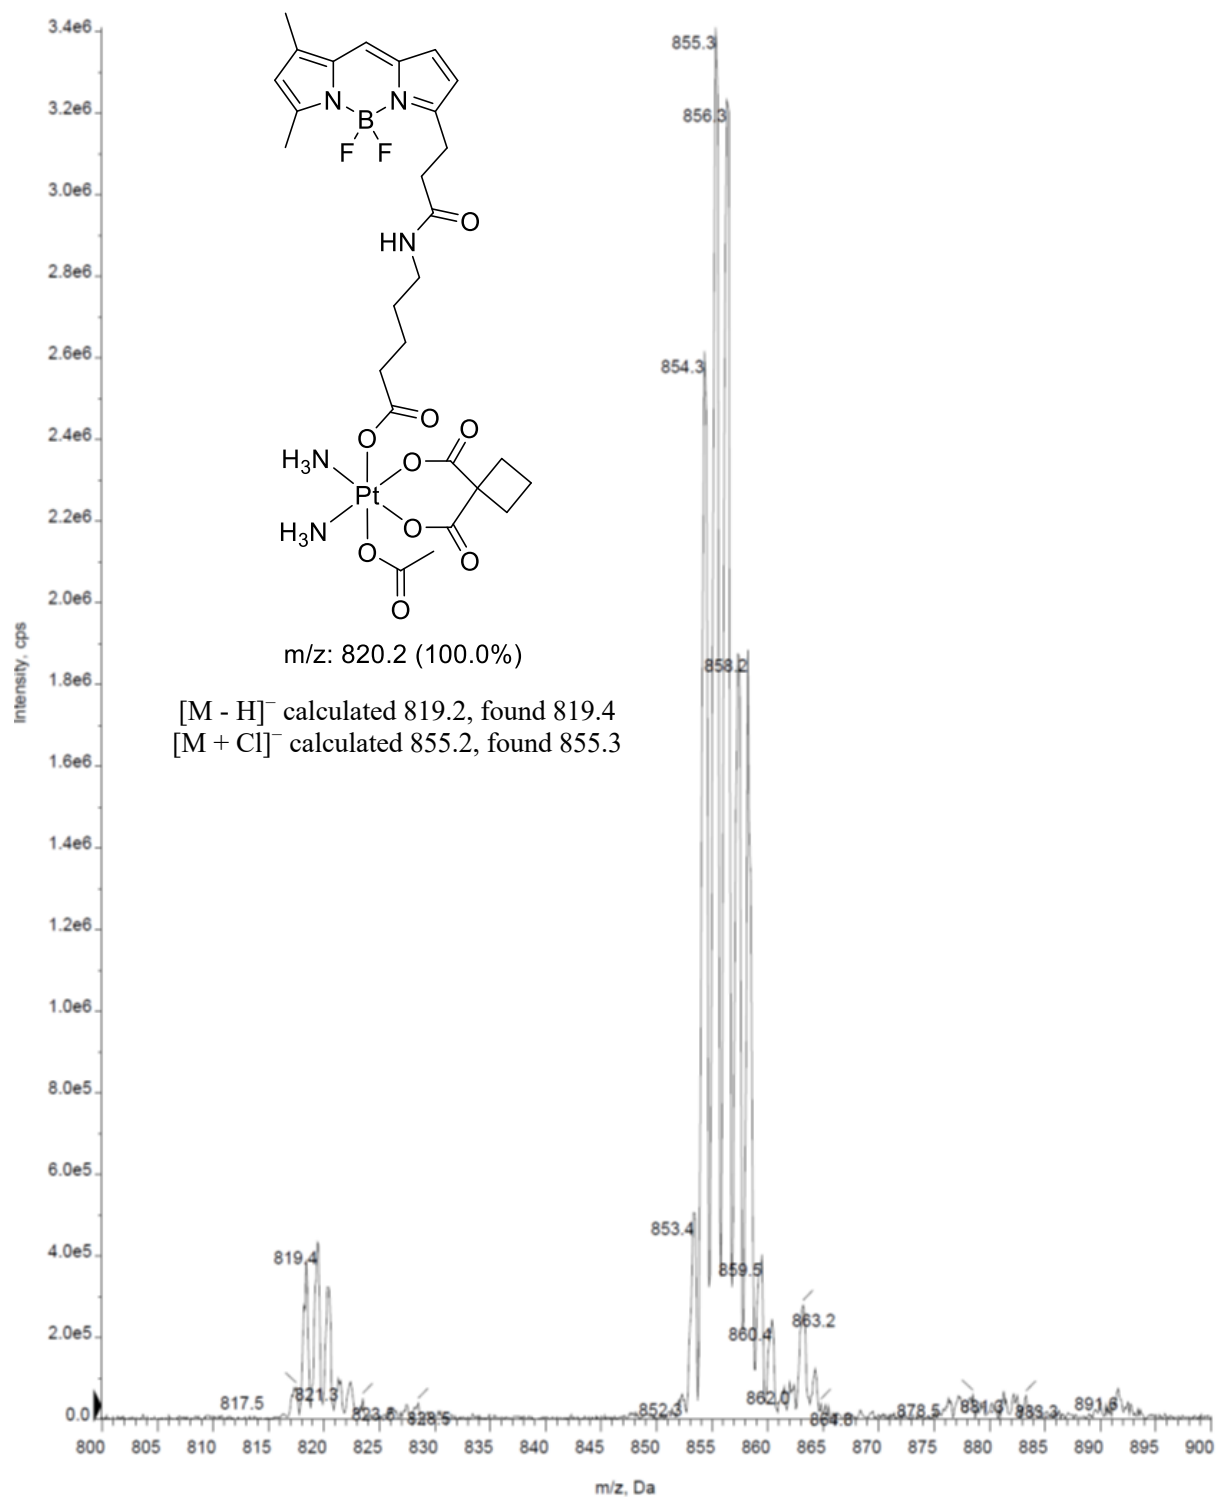

**Figure S73.** ESI-MS spectrum of complex **AC6C**, negative mode in methanol.

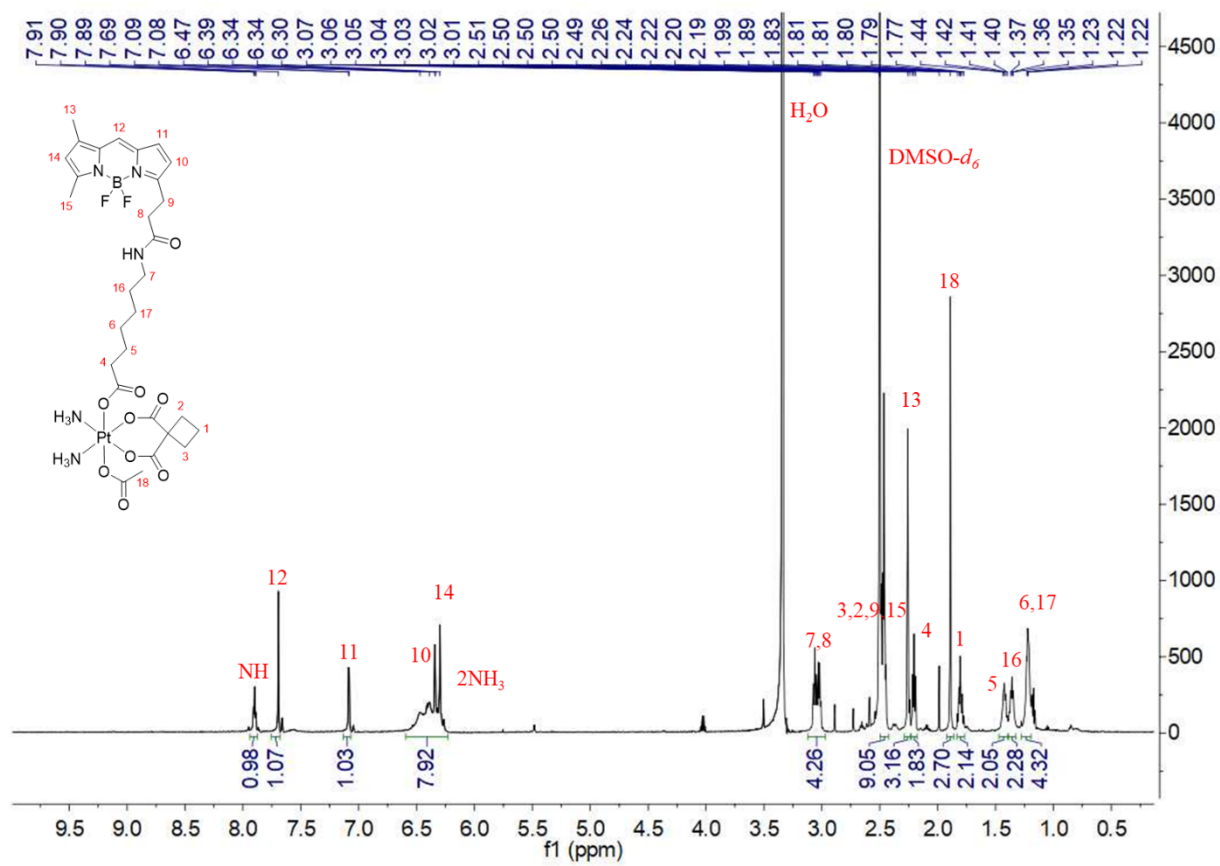

**Figure S74.**  $^1\text{H}$ -NMR spectrum of complex **AC8C** in  $\text{DMSO-}d_6$ .

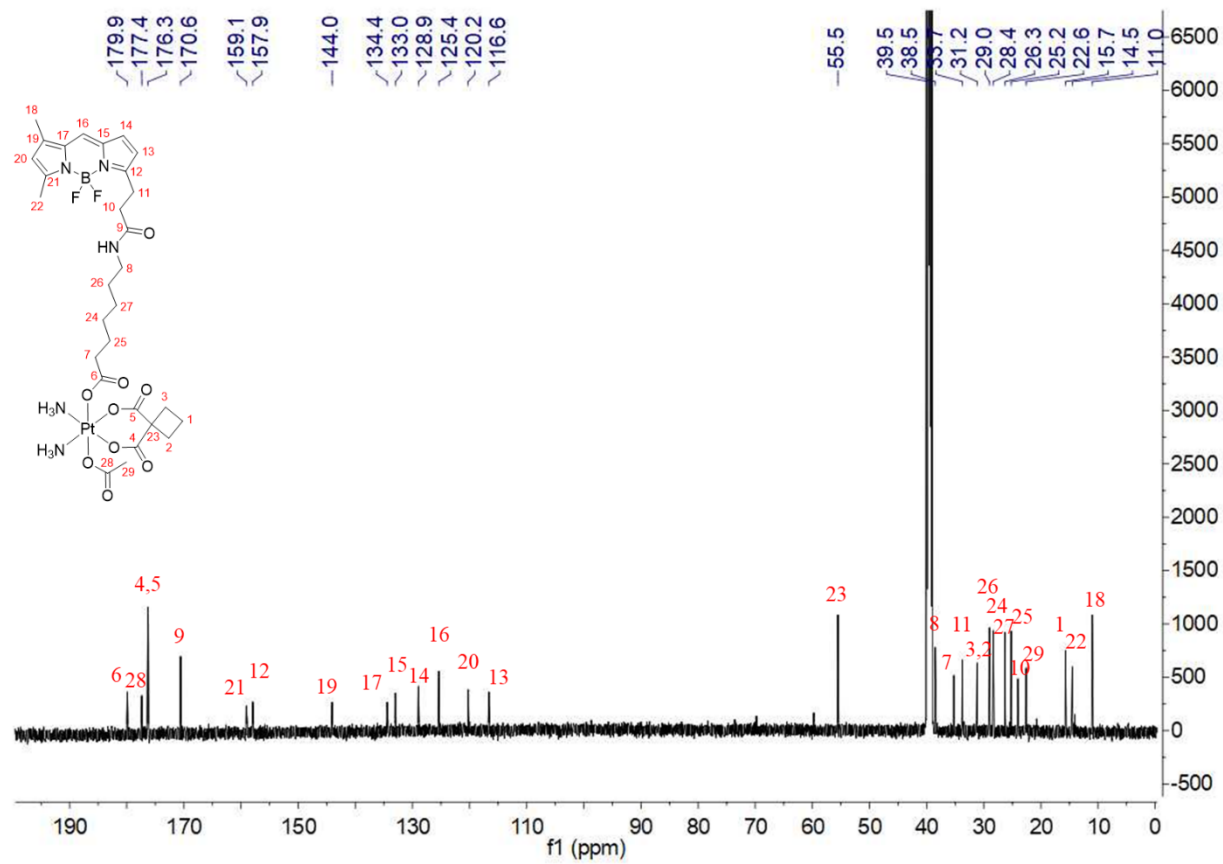

**Figure S75.**  $^{13}\text{C}$ -NMR spectrum of complex AC8C in  $\text{DMSO}-d_6$ .

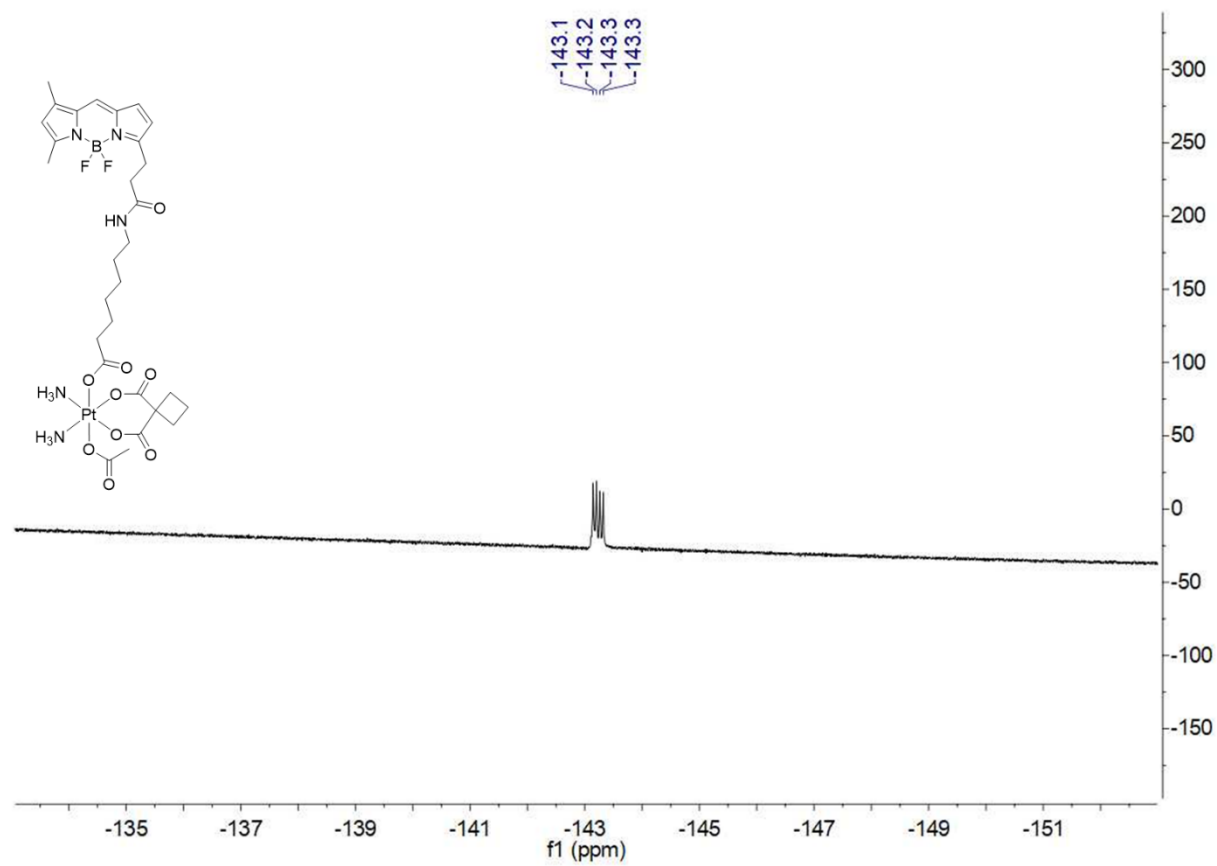

**Figure S76.**  $^{19}\text{F}$ -NMR spectrum of complex **AC8C** in  $\text{DMSO-}d_6$ .

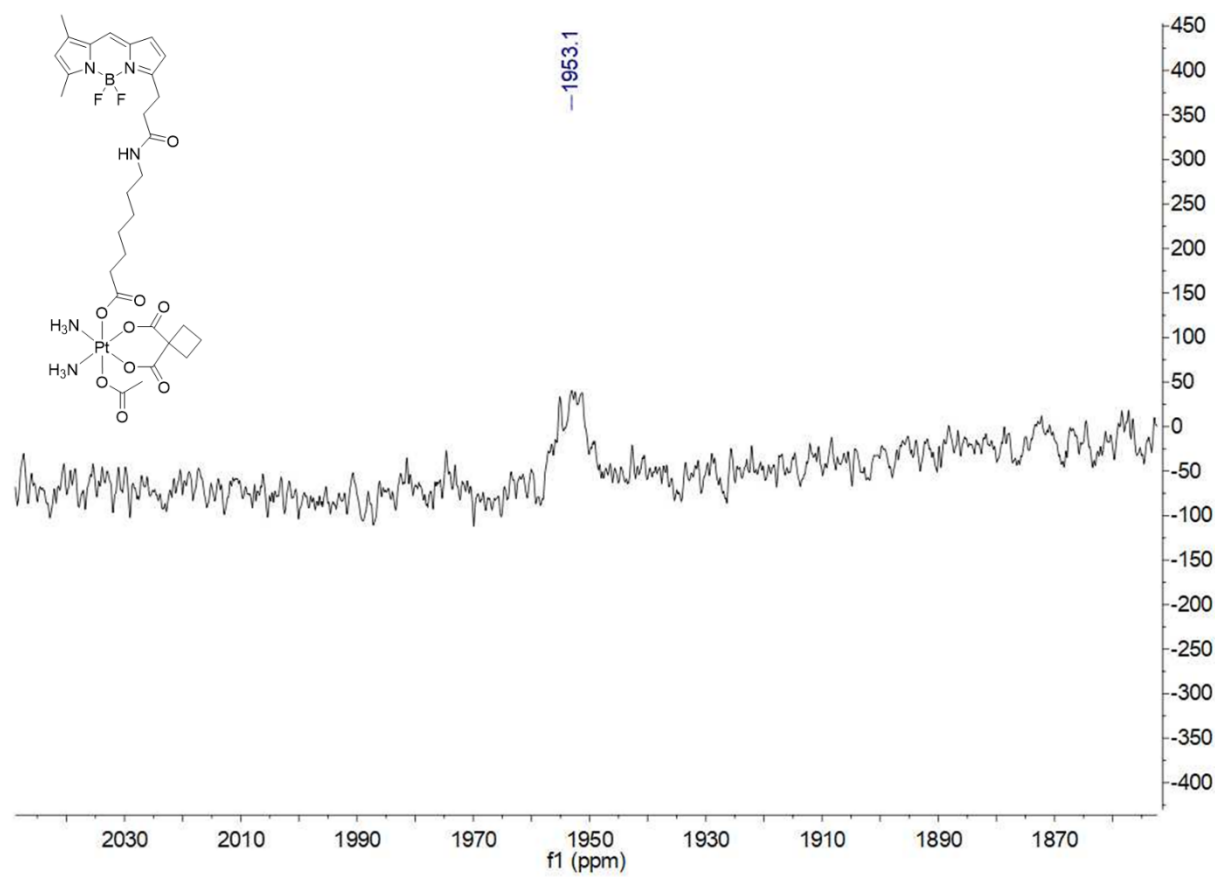

**Figure S77.**  $^{195}\text{Pt}$ -NMR spectrum of complex **AC8C** in  $\text{DMSO}-d_6$ .

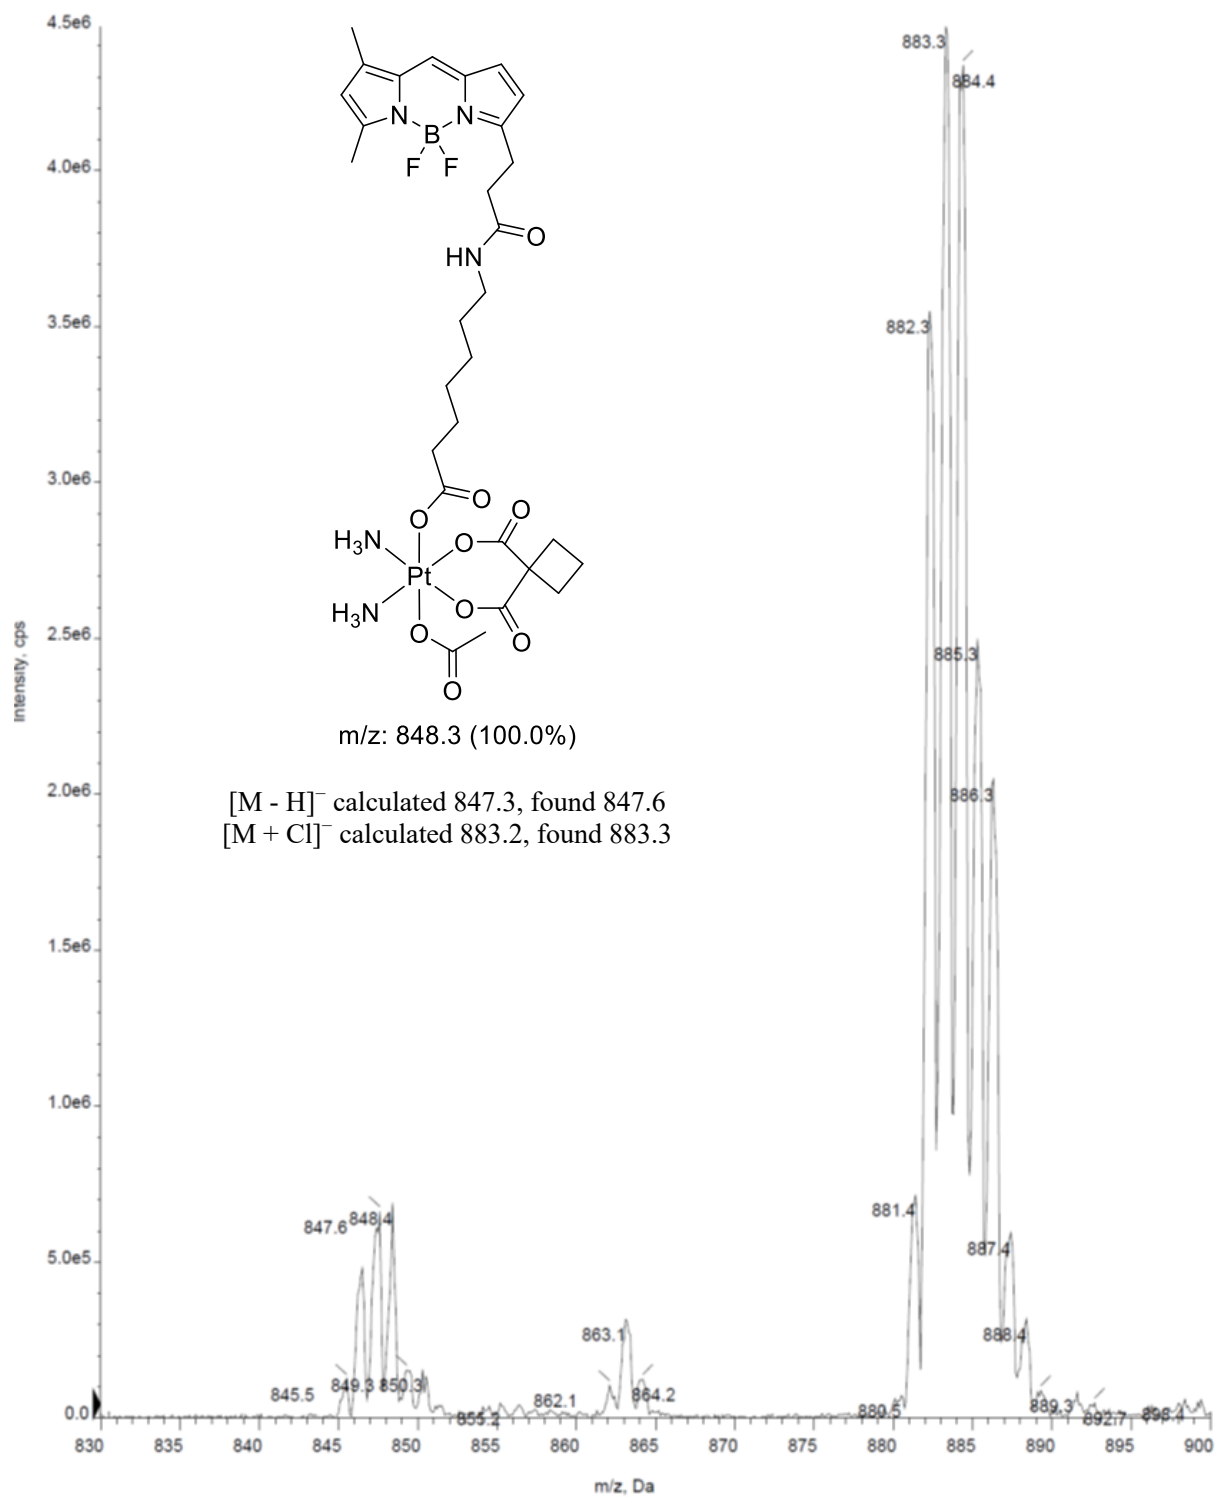

**Figure S78.** ESI-MS spectrum of complex **AC8C**, negative mode in methanol.

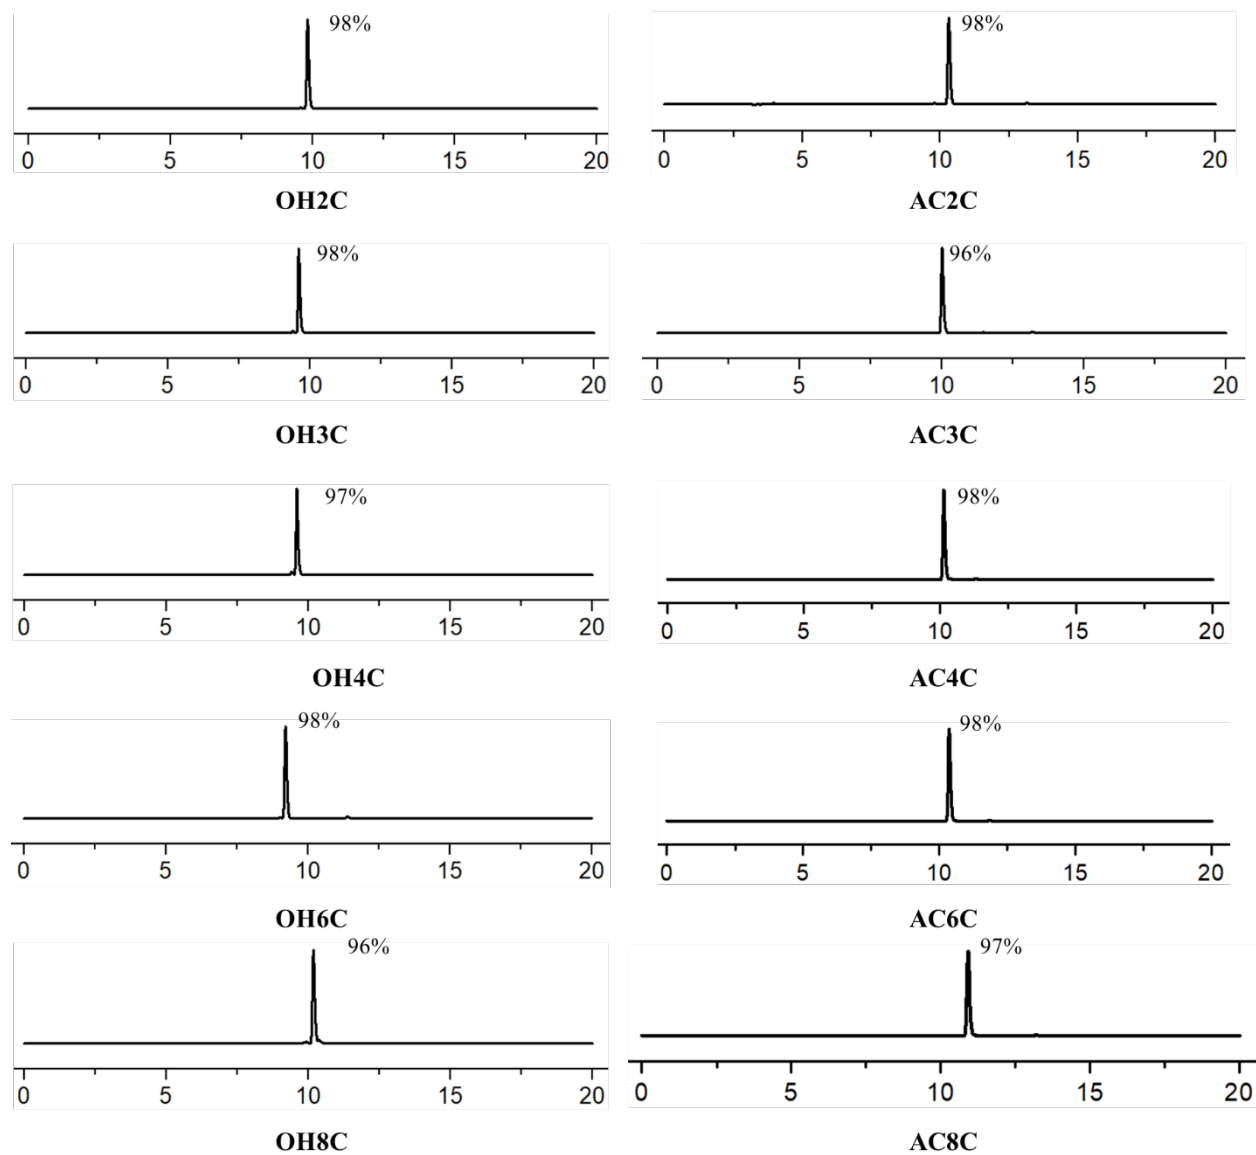

**Figure S79.** Purity of complexes **OH2C-OH8C** and **AC2C-AC8C**, determined by HPLC. HPLC condition: 0 - 3 - 16 - 17 - 20 min, 10 - 50 - 63 - 10 - 10% acetonitrile with 0.1% HCOOH. Flow rate: 1 mL/min. wavelength: 504 nm.

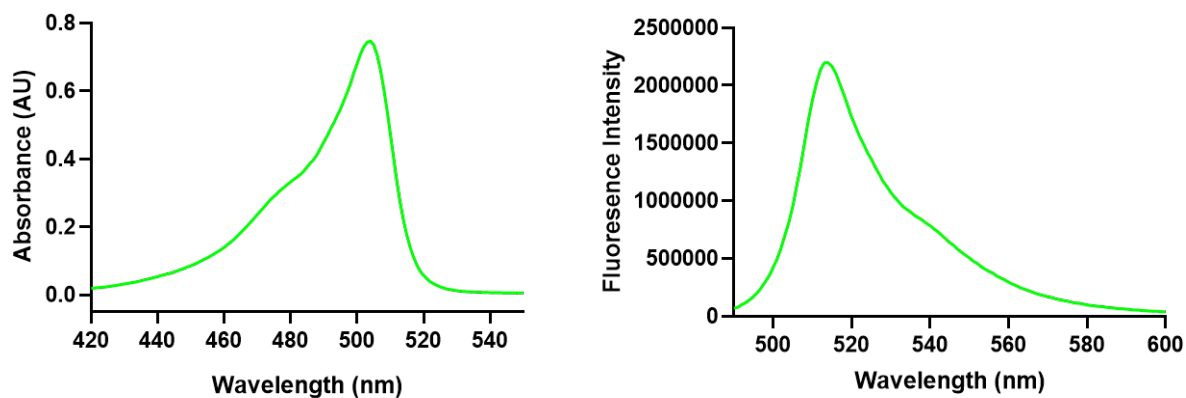

**Figure S80.** Absorbance and emission of the BODIPY ligand. 10  $\mu$ M compound was dissolved in PBS buffer (pH 7.4) with 1% DMF. Ex = 470 nm.



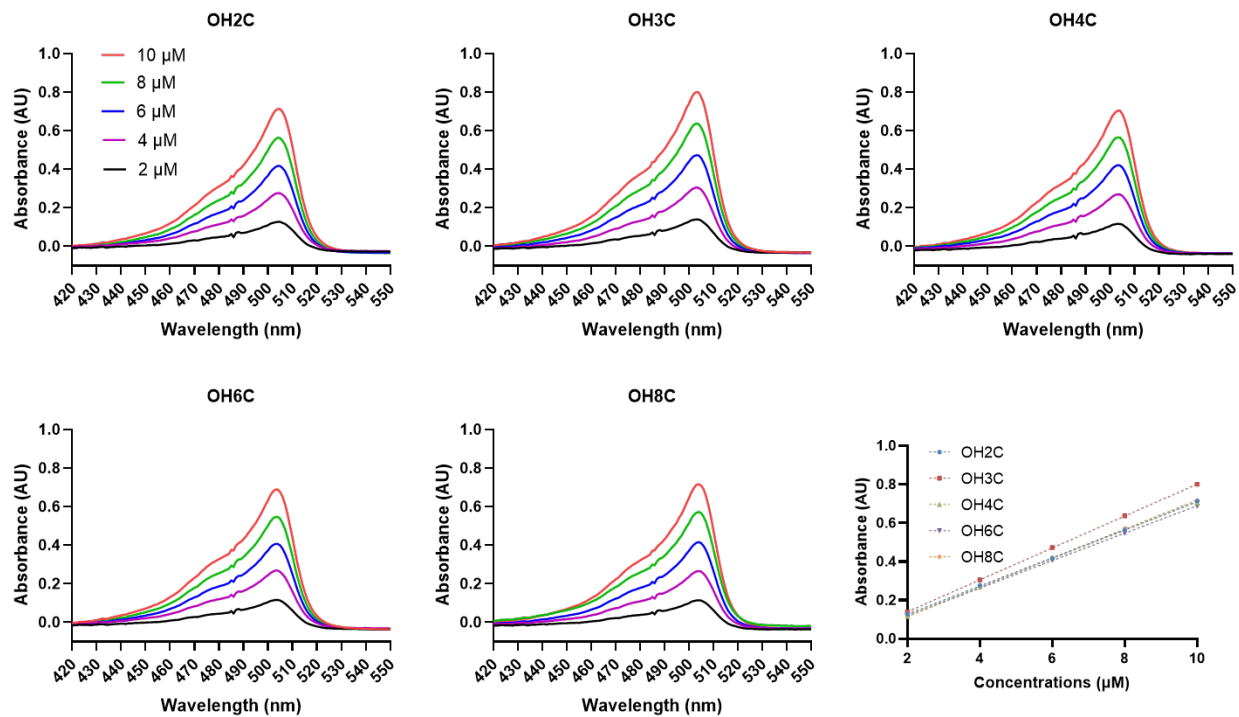

**Figure S81.** Molar extinction coefficients of complexes **OH2C-OH8C**. 10, 8, 6, 4, and 2  $\mu\text{M}$  of compounds were dissolved in PBS buffer (pH 7.4) with 1% DMF. The absorbances were recorded by a UV-Vis spectrophotometer. The maximum absorbances at each concentration were plotted with the concentrations of complexes.

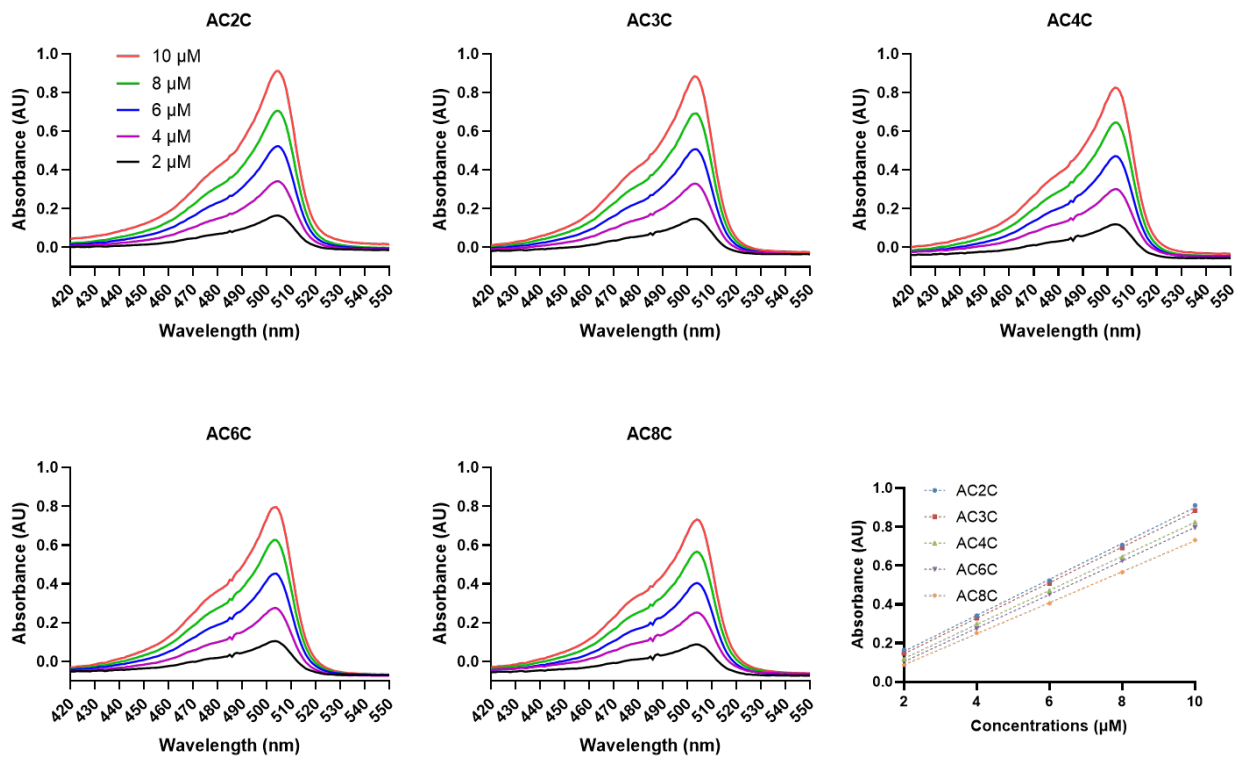

**Figure S82.** Molar extinction coefficients of complexes **AC2C-AC8C**. 10, 8, 6, 4, and 2  $\mu\text{M}$  of compounds were dissolved in PBS buffer (pH 7.4) with 1% DMF. The absorbances were recorded by a UV-Vis spectrophotometer. The maximum absorbances at each concentration were plotted with the concentrations of complexes.

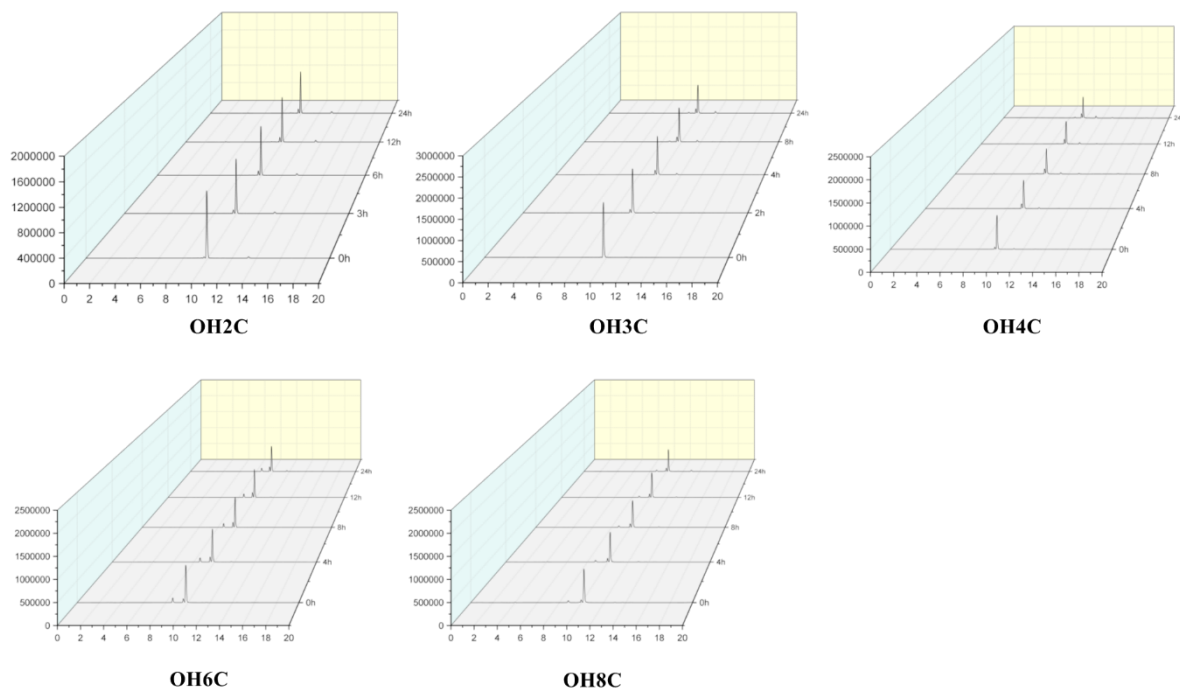

**Figure S83.** Stability of complexes **OH2C-OH8C** in PBS buffer (pH 7.4) at 37 °C in the dark.

HPLC condition: 0 - 3 - 16 - 17 - 20 min, 10 - 50 - 63 - 10 - 10% acetonitrile with 0.1% HCOOH.

1 mL/min. wavelength: 504 nm.

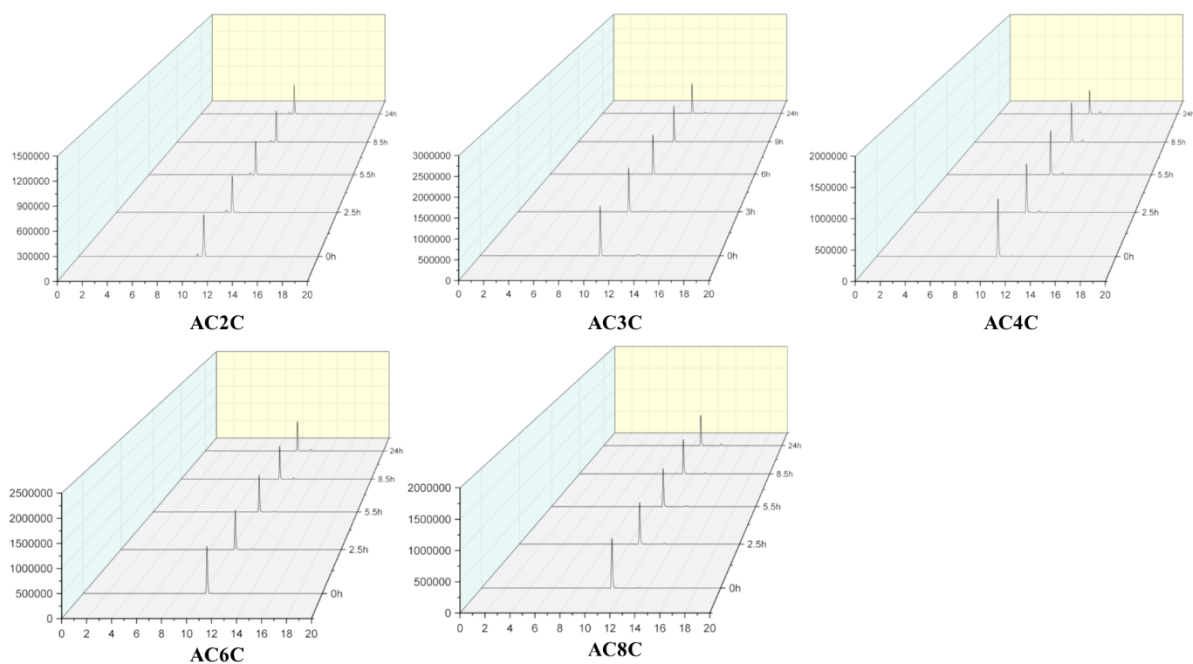

**Figure S84.** Stability of complexes **AC2C-AC8C** in PBS buffer (pH 7.4) at 37 °C in the dark.

HPLC condition: 0 - 3 - 16 - 17 - 20 min, 10 - 50 - 63 - 10 - 10% acetonitrile with 0.1% HCOOH.

1 mL/min. wavelength: 504 nm.

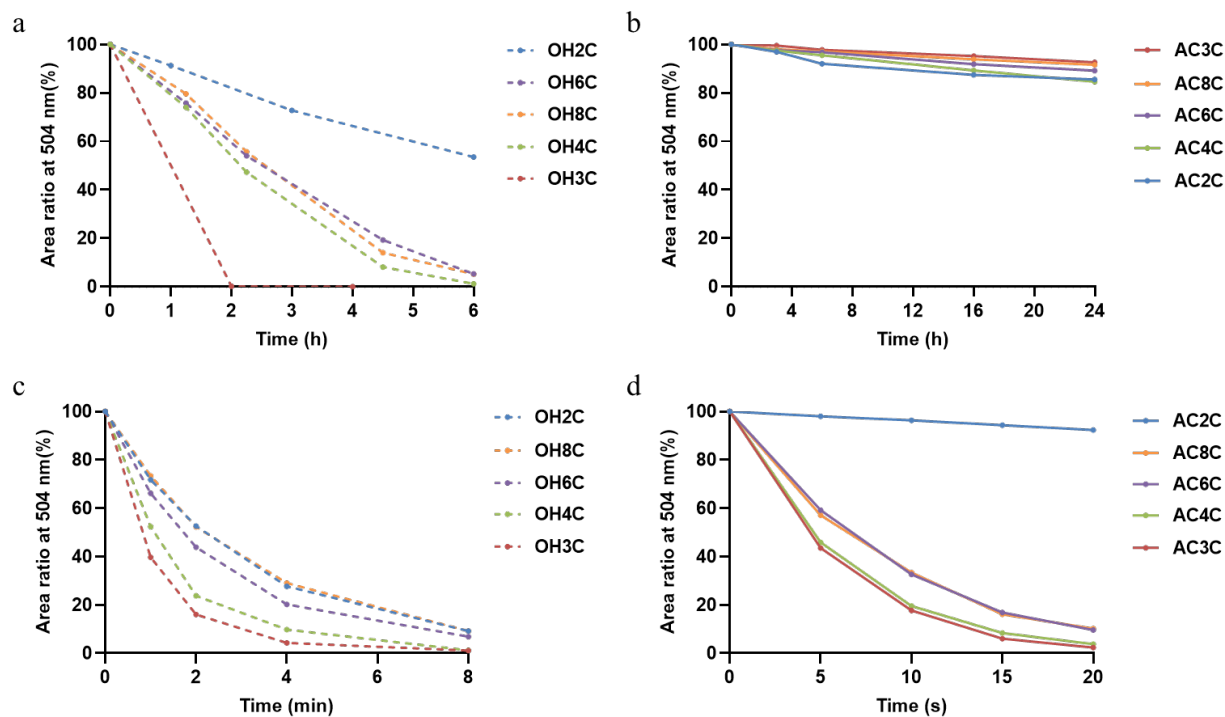

**Figure S85.** a. HPLC results of 10  $\mu$ M complexes **OH2C-OH8C** in PBS buffer (pH = 7.4) with 1 mM sodium ascorbate in the dark at 37  $^{\circ}$ C. b. HPLC results of 10  $\mu$ M complexes **AC2C-AC8C** in PBS buffer (pH = 7.4) with 1 mM sodium ascorbate in the dark at 37  $^{\circ}$ C. c. HPLC results of 10  $\mu$ M complexes **OH2C-OH8C** under white light (2 mW/cm<sup>2</sup>) in PBS buffer (pH = 7.4) with 1 mM sodium ascorbate. d. HPLC results of 10  $\mu$ M complexes **AC2C-AC8C** under white light (2 mW/cm<sup>2</sup>) in PBS buffer (pH = 7.4) with 1 mM sodium ascorbate.

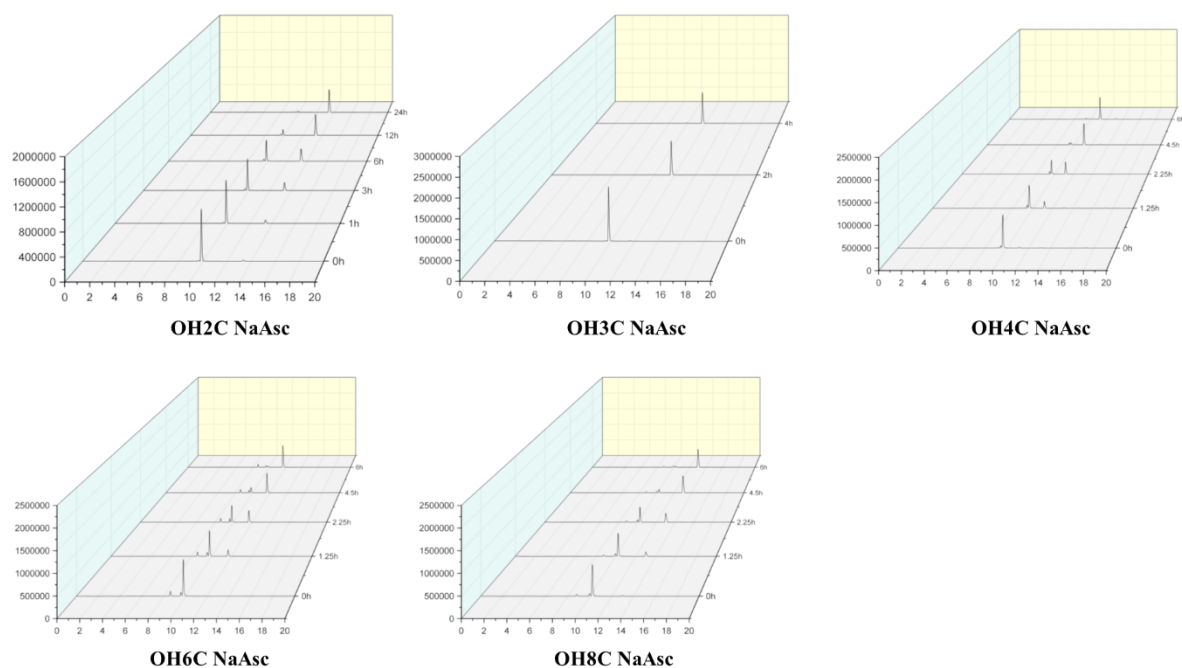

**Figure S86.** Reduction of complexes **OH2C-OH8C** in PBS buffer (pH 7.4) with 1 mM sodium ascorbate (NaAsc) at 37 °C in the dark. HPLC condition: 0 - 3 - 16 - 17 - 20 min, 10 - 50 - 63 - 10 - 10% acetonitrile with 0.1% HCOOH. 1 mL/min. wavelength: 504 nm.

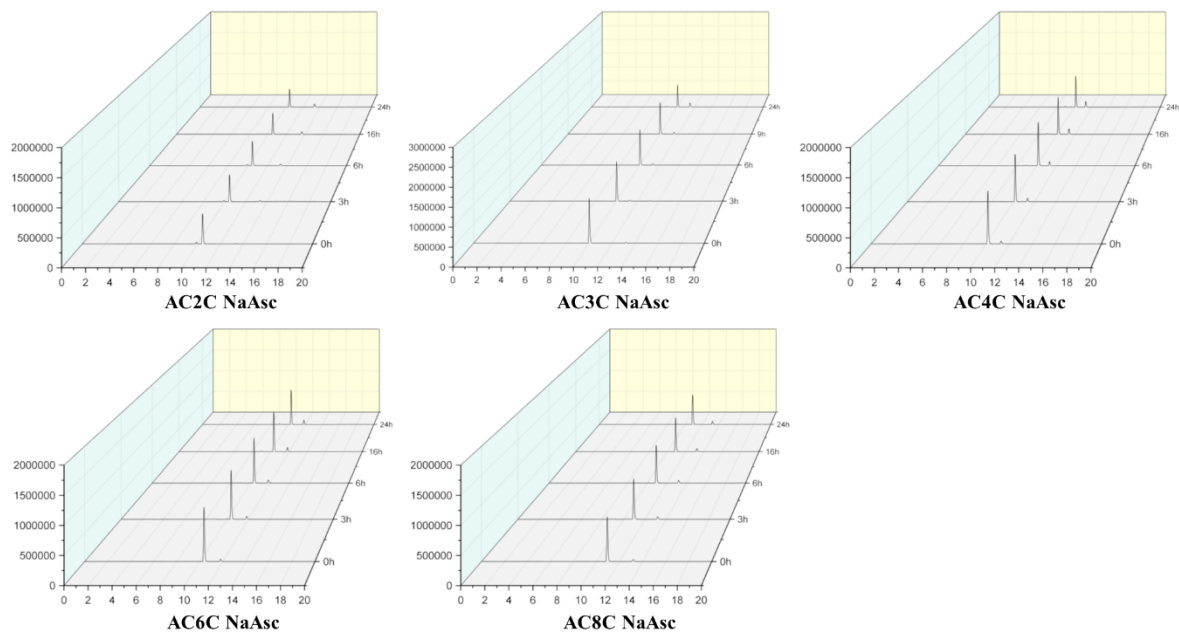

**Figure S87.** Reduction of complexes **AC2C-AC8C** in PBS buffer (pH 7.4) with 1 mM sodium ascorbate (NaAsc) at 37 °C in the dark. HPLC condition: 0 - 3 - 16 - 17 - 20 min, 10 - 50 - 63 - 10 - 10% acetonitrile with 0.1% HCOOH. 1 mL/min. wavelength: 504 nm.

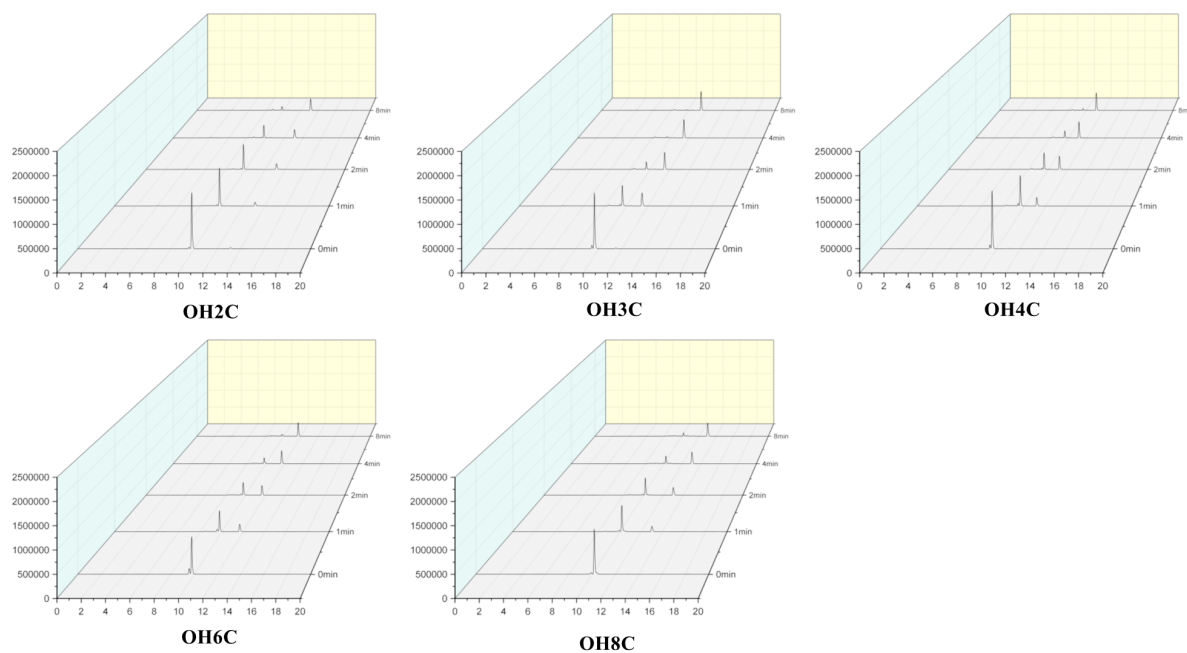

**Figure S88.** Photoactivation of complexes **OH2C-OH8C** under white light ( $2 \text{ mW/cm}^2$ ) in PBS buffer (pH 7.4). HPLC condition: 0 - 3 - 16 - 17 - 20 min, 10 - 50 - 63 - 10 - 10% acetonitrile with 0.1% HCOOH. 1 mL/min. wavelength: 504 nm.



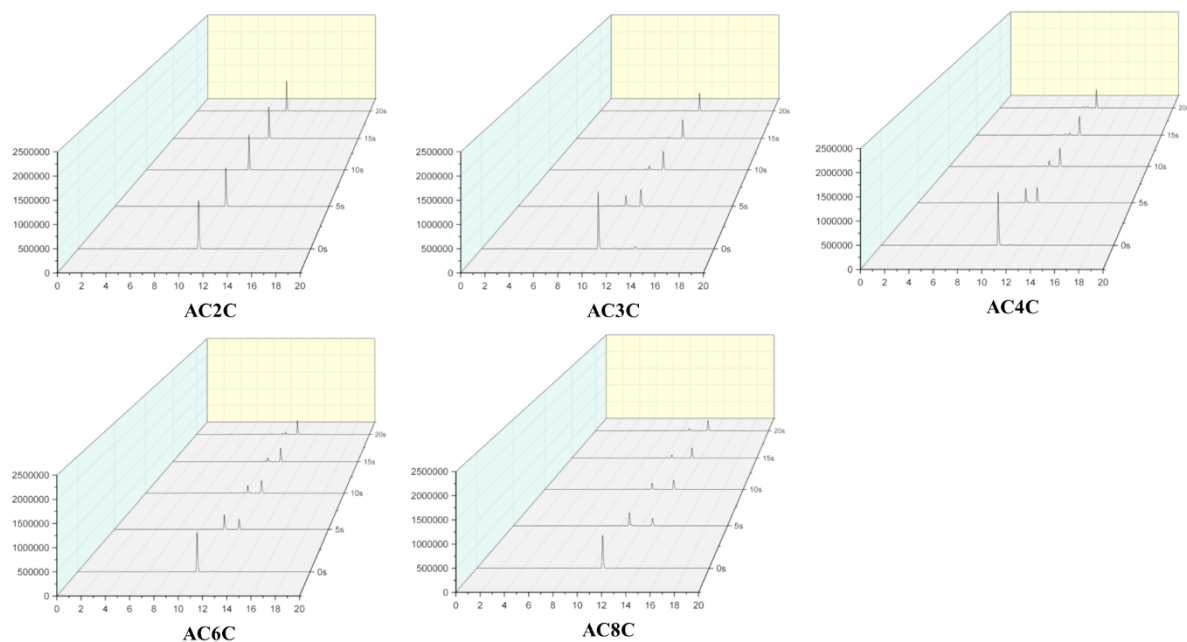

**Figure S89.** Photoactivation of complexes **AC2C-AC8C** under white light ( $2 \text{ mW/cm}^2$ ) in PBS buffer (pH 7.4). HPLC condition: 0 - 3 - 16 - 17 - 20 min, 10 - 50 - 63 - 10 - 10% acetonitrile with 0.1%  $\text{HCOOH}$ . 1 mL/min. wavelength: 504 nm.

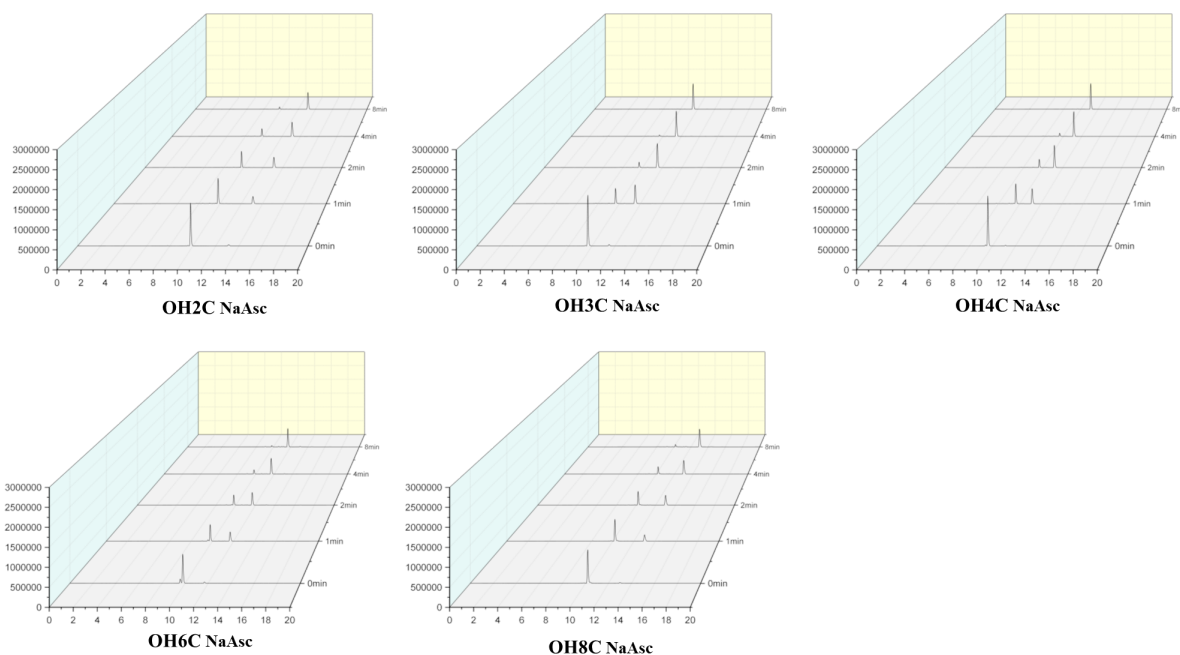

**Figure S90.** Photoactivation of complexes **OH2C-OH8C** under white light ( $2 \text{ mW/cm}^2$ ) in PBS buffer (pH 7.4) with 1 mM sodium ascorbate (NaAsc). HPLC condition: 0 - 3 - 16 - 17 - 20 min, 10 - 50 - 63 - 10 - 10% acetonitrile with 0.1%  $\text{HCOOH}$ . 1 mL/min. wavelength: 504 nm.

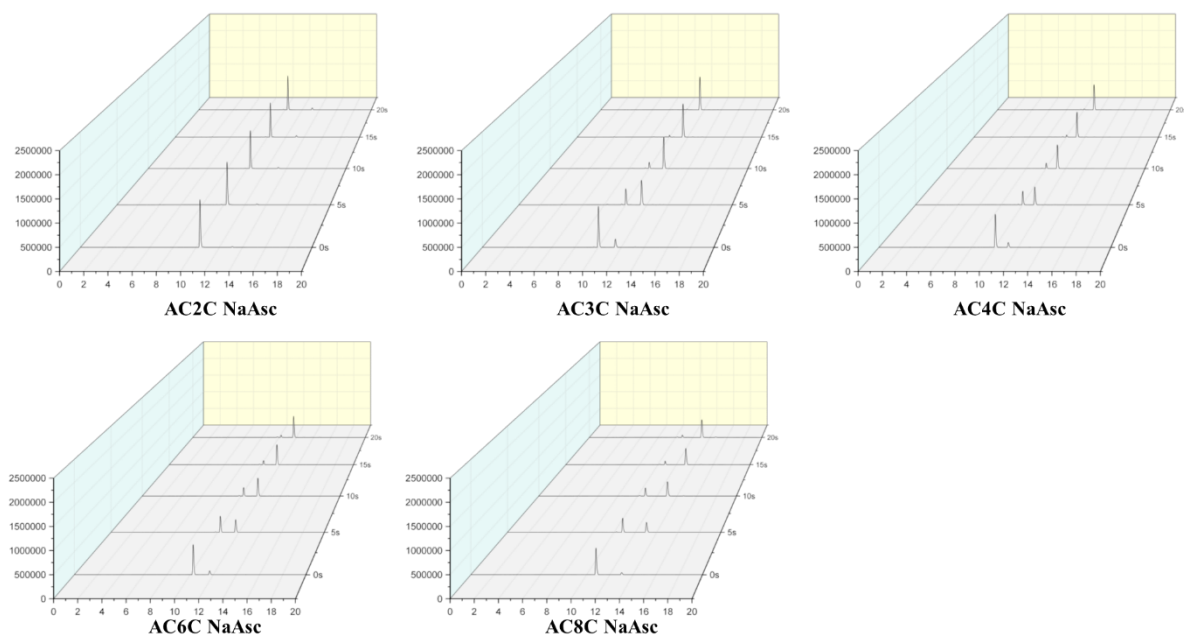

**Figure S91.** Photoactivation of complexes **AC2C-AC8C** under white light ( $2 \text{ mW/cm}^2$ ) in PBS buffer (pH 7.4) with 1 mM sodium ascorbate (NaAsc). HPLC condition: 0 - 3 - 16 - 17 - 20 min, 10 - 50 - 63 - 10 - 10% acetonitrile with 0.1%  $\text{HCOOH}$ . 1 mL/min. wavelength: 504 nm.

**Table S1.** Cellular accumulation of 10  $\mu$ M complexes carboplatin, **OH2C-OH8C**, and **AC2C-AC8C** in A2780 cells.

| Compounds   | Pt concentration (ng Pt/<br>10 <sup>6</sup> cells) |
|-------------|----------------------------------------------------|
| <b>OH2C</b> | 26.5 $\pm$ 2.5                                     |
| <b>OH3C</b> | 66.0 $\pm$ 6.0                                     |
| <b>OH4C</b> | 44.1 $\pm$ 3.9                                     |
| <b>OH6C</b> | 52.6 $\pm$ 1.9                                     |
| <b>OH8C</b> | 57.3 $\pm$ 2.8                                     |
| <b>AC2C</b> | 23.8 $\pm$ 3.7                                     |
| <b>AC3C</b> | 48.1 $\pm$ 4.0                                     |
| <b>AC4C</b> | 34.0 $\pm$ 4.7                                     |
| <b>AC6C</b> | 33.3 $\pm$ 3.4                                     |
| <b>AC8C</b> | 31.1 $\pm$ 2.6                                     |
| Carboplatin | 13.3 $\pm$ 1.0                                     |

**Table S2.** IC<sub>50</sub> (μM) of complexes carboplatin, **OH2C-OH8C**, and **AC2C-AC8C** in A2780 cells.

| Compounds   | Light (+)   | Light (-)   |
|-------------|-------------|-------------|
| <b>OH2C</b> | > 100       | > 100       |
| <b>OH3C</b> | 43.9 ± 5.2  | 69.8 ± 4.9  |
| <b>OH4C</b> | 48.3 ± 2.0  | 74.8 ± 8.2  |
| <b>OH6C</b> | 76.8 ± 9.9  | > 100       |
| <b>OH8C</b> | > 100       | > 100       |
| <b>AC2C</b> | 66.6 ± 7.0  | > 100       |
| <b>AC3C</b> | 43.8 ± 3.9  | > 100       |
| <b>AC4C</b> | 88.6 ± 15.7 | > 100       |
| <b>AC6C</b> | > 100       | > 100       |
| <b>AC8C</b> | > 100       | > 100       |
| Carboplatin | 104 ± 11.1  | 106.6 ± 8.4 |

Cells were treated with complexes carboplatin, **OH2C-OH8C**, and **AC2C-AC8C** at different concentrations for 12 h before irradiation under white light (2 mW/cm<sup>2</sup>) (+) or keep in the dark (-) for 30 min and then incubation in fresh media for another 72 h.
